# Supplementary material
Source: publisher figshare collection journal article supplement (https://acs.figshare.com/ndownloader/files/7396231)

## Supporting Information

### **Anionic Head Containing Oxacalix[2]arene[2]triazines: Synthesis and Anion- $\pi$ Directed Self-assembly in Solution and Solid State**

Rui-Bin Xu,<sup>1,2</sup> Qi-Qiang Wang,<sup>1,2,\*</sup> Yu-Fei Ao,<sup>1</sup> Zhi-Yan Li,<sup>1</sup> Zhi-Tang Huang,<sup>1</sup>  
De-Xian Wang<sup>1,2,\*</sup>

<sup>1</sup> Beijing National Laboratory for Molecular Sciences, CAS Key Laboratory of  
Molecular Recognition and Function, Institute of Chemistry, Chinese Academy of  
Sciences, Beijing 100190, China

<sup>2</sup> University of Chinese Academy of Sciences, Beijing 100049, China

## Table of Contents

|                                                                                     |     |
|-------------------------------------------------------------------------------------|-----|
| 1. General information                                                              | S3  |
| 2. Synthesis procedure                                                              | S3  |
| 3. Spectroscopic titrations                                                         | S12 |
| 4. Fluorescent spectra of <b>5a-d</b>                                               | S14 |
| 5. Variable temperature and concentration <sup>1</sup> H NMR spectra of <b>5a-d</b> | S16 |
| 6. DOSY results for <b>5a-d</b> at variable concentrations                          | S21 |
| 7. DLS measurements for <b>5a-d</b> at variable concentrations                      | S25 |
| 8. ESI-MS spectra                                                                   | S29 |
| 9. X-ray crystallography study of <b>5a-c</b>                                       | S38 |
| 10. Copies of NMR spectra for new compounds                                         | S41 |

## 1. General information

$^1\text{H}$  and  $^{13}\text{C}$  NMR spectra were recorded on 300, 400, 500 and 600 MHz NMR spectrometers. Chemical shifts are reported in ppm with either tetramethylsilane or the residual solvent as an internal standard. Melting points are uncorrected. Elemental analyses were performed with Vario ELIII and Carlo Erba 1106 analytical instruments. The fluorescence spectra were measured with a Hitachi F-7000 fluorescence spectrophotometer. All anhydrous solvents were dried according to standard procedures prior to use. All chemicals were obtained from commercial sources and used without further purification.

Fluorescence titration experiments were carried out with the concentration of oxacalix[2]arene[2]triazine being constant, spectral changes were recorded with the increase of anion concentrations (in tetraalkylammonium salts). The spectroscopic titration data were fitted by a Hyperquad 2003 program to calculate the association constants.

Colorless single crystal of **5a** was obtained by slowly cooling the hot saturated solution of **5a** in acetonitrile. Slow evaporation of the sample solutions from acetonitrile/toluene/hexane and dichloromethane/toluene/hexane afforded the colorless single crystals of **5b** and **5c** respectively.

## 2. Synthesis procedure

Scheme S1 Synthesis of **2b**

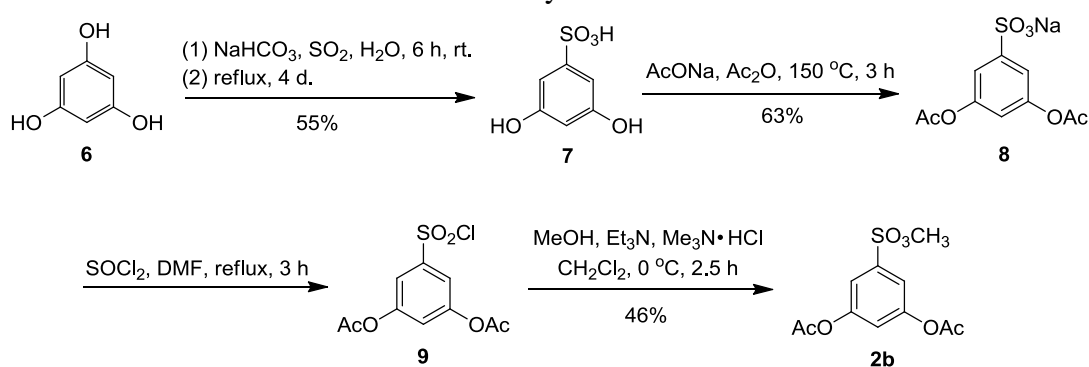

### Synthesis of **8**

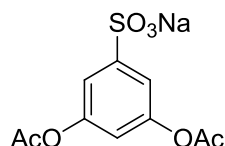

A mixture of 3,5-dihydroxybenzene sulfonic acid **7**<sup>[S1]</sup> (1 g, 5.30 mmol), sodium acetate (1.30 g, 15.90 mmol) and acetic anhydride (25 mL) was heated at reflux for 3 h, then cooled to room temperature. To the mixture was added ether/hexane (75

<sup>[S1]</sup> Ghosh, A. K.; Bilcer, G. M.; Devasamudram, T. *PCT Int. Appl.* **2003**, 224.

mL/75 mL), the solids were collected by filtration and redissolved in methanol and purified with a column of silica gel (100-200 mesh, dichloromethane/methanol = 10:1) to afford the compound **8** as a light yellow solid (1.13 g, 78%): mp 195-196 °C; IR (KBr) 1765, 1441, 1199 cm<sup>-1</sup>; <sup>1</sup>H NMR (400 MHz, *d*<sub>6</sub>-DMSO, ppm) 7.22 (d, *J* = 2 Hz, 2H), 6.93 (t, *J* = 2 Hz, 1H), 2.27 (s, 6H); <sup>13</sup>C NMR (100 MHz, *d*<sub>6</sub>-DMSO, ppm) 168.9, 150.4, 150.1, 116.5, 115.9, 20.8; HRMS (ESI, positive): *m/z* Calcd. for C<sub>10</sub>H<sub>10</sub>NaO<sub>7</sub>S [M+H]<sup>+</sup> 297.00449, found 297.00394; Calcd. for C<sub>10</sub>H<sub>9</sub>Na<sub>2</sub>O<sub>7</sub>S [M+Na]<sup>+</sup> 318.98644, found 318.98584.

### Synthesis of 2b

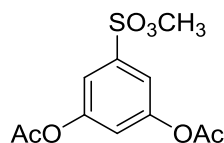

A mixture of compound **8** (296 mg, 1 mmol) and SOCl<sub>2</sub> (5 mL) was refluxed in the presence of DMF (0.1 mL) for 3 h. The resulting mixture was concentrated to afford the compound **9** which was directly used in the next step.

To a solution of triethylamine (0.76 mL, 5.14 mmol), trimethylamine hydrochloride (325 mg, 3.42 mmol) and methanol (0.28 mL, 6.85 mmol) in anhydrous dichloromethane (30 mL) at 0°C was added a solution of **9** (1 g, 3.42 mL) in anhydrous dichloromethane (10 mL). The reaction mixture was stirred for another 2.5 h, then washed with H<sub>2</sub>O (30 mL × 2) and brine (20 mL). The organic layer was dried with Na<sub>2</sub>SO<sub>4</sub>, concentrated *in vacuo* and the residue was purified by chromatography on silica gel (100-200 mesh, petroleum ether/ethyl acetate = 1:1) to yield pure compound **2b** as a light yellow solid (450 mg, 46% for the two steps): mp 101-102 °C; IR (KBr) 1774, 1368, 1179, 1130 cm<sup>-1</sup>; <sup>1</sup>H NMR (400 MHz, CDCl<sub>3</sub>, ppm) 7.55 (d, *J* = 2 Hz, 2H), 7.26 (t, *J* = 2.2 Hz, 1H), 3.81 (s, 3H), 2.33 (s, 6H); <sup>13</sup>C NMR (125 MHz, CDCl<sub>3</sub>, ppm) 168.4, 151.5, 137.0, 121.3, 118.9, 57.1, 21.1; HRMS (ESI, positive): *m/z* Calcd. for C<sub>11</sub>H<sub>12</sub>NaO<sub>7</sub>S [M+Na]<sup>+</sup> 311.02014, found 311.01970. Anal. Calcd. for C<sub>11</sub>H<sub>12</sub>O<sub>7</sub>S: C, 45.83; H, 4.20; S, 11.12. Found: C, 45.78; H, 4.11; S, 10.99.

### Synthesis of 3a

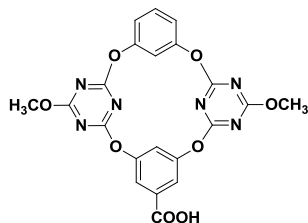

To a three-necked flask containing potassium carbonate (1.55 g, 11.2 mmol) and acetonitrile (400 mL) was added dropwise a mixed solution of trimer **1**<sup>[S2]</sup> (1.85 g, 4.68 mmol) and benzyl 3,5-dihydroxybenzoate **2a** (1.14 g, 4.68 mmol) in acetonitrile

<sup>[S2]</sup> Pan, S.; Wang, D.-X.; Zhao, L.; Wang, M.-X. *Tetrahedron* **2012**, 68, 9464-9477.

(200 mL) within 5 h. The mixture was stirred for another 2 h under reflux, then cooled to room temperature. After filtration, the filtrate was concentrated and the residue was dissolved in tetrahydrofuran/methanol (50 mL/50 mL). To this solution was added 10% Pd/C (500 mg, 0.2 equiv.). The mixture was stirred overnight at room temperature under H<sub>2</sub> (1 atm, balloon). The resulting mixture was filtered and the filtrate was concentrated. The residue was then purified by a column of silica gel (100-200 mesh, acetone/dichloromethane = 1:10) to afford the compound **3a** as a white solid (828 mg, 37%): mp 156-157 °C; IR (KBr) 3461, 1715, 1574, 1362 cm<sup>-1</sup>; <sup>1</sup>H NMR (400 MHz, *d*<sub>6</sub>-DMSO, ppm) 13.41 (br, s, 1H), 7.47 (d, *J* = 2.4 Hz, 2H), 7.37 (t, *J* = 2.2 Hz, 1H), 7.31 (t, *J* = 8 Hz, 1H), 7.04 (t, *J* = 2.2 Hz, 1H), 7.00-6.98 (dd, *J*<sub>1</sub> = 2.4 Hz, *J*<sub>2</sub> = 8 Hz, 2H), 4.03 (s, 6H); <sup>13</sup>C NMR (100 MHz, *d*<sub>6</sub>-DMSO, ppm) 174.2, 172.6, 172.5, 165.5, 151.7, 151.6, 133.4, 130.4, 121.3, 119.7, 118.9, 116.4, 55.8; HRMS (ESI, negative): *m/z* Calcd. for C<sub>21</sub>H<sub>13</sub>N<sub>6</sub>O<sub>8</sub> [M-H]<sup>-</sup> 477.07949, found 477.07779. Anal. Calcd. for C<sub>21</sub>H<sub>14</sub>N<sub>6</sub>O<sub>8</sub> 0.1CH<sub>2</sub>Cl<sub>2</sub>: C, 52.05; H, 2.94; N, 17.26. Found: C, 52.32; H, 3.16; N, 16.85.

### Synthesis of 3b

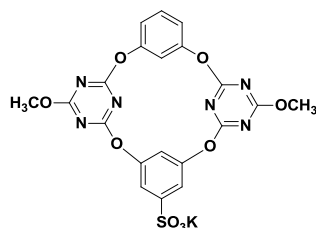

A mixture of compound **2b** (50 mg, 0.17 mmol), trimer **1** (69 mg, 0.17 mmol), K<sub>2</sub>CO<sub>3</sub> (144 mg, 1.05 mmol) and acetonitrile (50 mL) was heated at reflux for 2 h, then cooled to room temperature. The resulting mixture was filtered and the filtrate was concentrated and purified on a column of silica gel (100-200 mesh, dichloromethane/methanol = 10:1) to afford the compound **3b** as a white solid (17 mg, 18%): <sup>1</sup>H NMR (400 MHz, *d*<sub>6</sub>-DMSO, ppm) 7.37 (t, *J* = 8.4 Hz, 1H), 7.11 (m, 4H), 7.02-7.00 (dd, *J*<sub>1</sub> = 1.6 Hz, *J*<sub>2</sub> = 8 Hz, 2H), 4.04 (s, 6H); <sup>13</sup>C NMR (100 MHz, *d*<sub>6</sub>-DMSO, ppm) 174.1, 172.5, 172.4, 151.5, 150.8, 150.6, 130.6, 118.9, 116.6, 116.3, 115.7, 55.7; HRMS (ESI, negative): *m/z* Calcd. for C<sub>20</sub>H<sub>13</sub>N<sub>6</sub>O<sub>9</sub>S [M-K]<sup>-</sup> 513.04647, found 513.04492.

### Synthesis of 3c

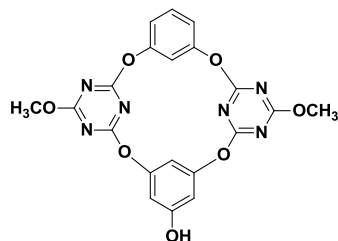

To a three-necked flask containing potassium carbonate (994 mg, 7.2 mmol) and

acetonitrile (400 mL) was added dropwise a solution of 5-(benzyloxy)-benzene-1,3-diol **2c** (648 mg, 3 mmol) and trimer **1** (1.85 g, 4.68 mmol) in acetonitrile (250 mL) under reflux within 5 h. The mixture was stirred for another 2 h, then cooled to room temperature. After filtration, the filtrate was concentrated, and then dissolved in tetrahydrofuran/methanol (50 mL/50 mL). To this solution was added 10% Pd/C (500 mg, 0.2 equiv.), stirred overnight at room temperature under H<sub>2</sub> (1 atm, balloon). After filtration, the filtrate was concentrated, and then purified on a column of silica gel (100-200 mesh, petroleum/ethyl acetate = 2:1) to afford the pure compound **3c** as a white solid (800 mg, 27% for the two steps): mp 207-208 °C; IR (KBr) 1570, 1430, 1363 cm<sup>-1</sup>; <sup>1</sup>H NMR (400 MHz, *d*<sub>6</sub>-DMSO) 10.04 (s, 1H), 7.38 (t, *J* = 8.2 Hz, 1H), 7.07 (t, *J* = 2.2 Hz, 1H), 7.04- 7.02 (dd, *J*<sub>1</sub> = 2 Hz, *J*<sub>2</sub> = 8 Hz, 2H), 6.45 (t, *J* = 2 Hz, 1H), 6.35 (d, *J* = 2 Hz, 2H), 4.02 (s, 6H); <sup>13</sup>C NMR (100 MHz, *d*<sub>6</sub>-DMSO) 174.1, 172.6, 172.5, 158.8, 152.1, 151.7, 130.4, 118.8, 116.5, 106.7, 106.0, 55.7; HRMS (ESI, negative): *m/z* Calcd. for C<sub>20</sub>H<sub>13</sub>N<sub>6</sub>O<sub>7</sub> [M-H]<sup>-</sup> 449.08457, found 449.08472. Anal. Calcd. for C<sub>20</sub>H<sub>14</sub>N<sub>6</sub>O<sub>7</sub> 0.5CH<sub>2</sub>Cl<sub>2</sub>: C, 49.96; H, 3.07; N, 17.05. Found: C, 50.01; H, 3.12; N, 16.99.

### Synthesis of **4a**

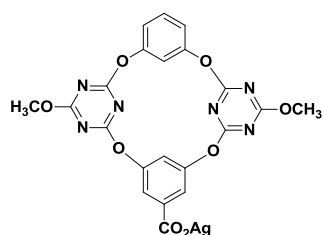

To a solution of **3a** (500 mg, 1.05 mmol) in anhydrous DMF (25 mL) was added sodium hydride (25.2 mg, 1.05 mmol). After stirring at room temperature for 1 h, the resulting mixture was filtered. To the filtrate was added a solution of silver nitrate (268 mg, 1.58 mmol) in water (30 mL). The mixture was stirred at room temperature for another 15 minutes, and the precipitates were collected by filtration to give the compound **4a** as a white solid (550 mg, 90%): <sup>1</sup>H NMR (400 MHz, *d*<sub>6</sub>-DMSO, ppm) 7.40 (d, *J* = 2 Hz, 2H), 7.33 (t, *J* = 8 Hz, 1H), 7.12 (s, 1H), 7.05 (s, 1H), 6.98-7.01 (dd, *J*<sub>1</sub> = 2 Hz, *J*<sub>2</sub> = 8 Hz, 2H), 4.04 (s, 6H); <sup>13</sup>C NMR (100 MHz, *d*<sub>6</sub>-DMSO, ppm) 174.1, 172.6, 172.5, 167.6, 151.6, 151.1, 130.4, 119.4, 118.9, 118.1, 116.4, 55.7. HRMS (ESI, negative): *m/z* Calcd. for C<sub>21</sub>H<sub>13</sub>N<sub>6</sub>O<sub>8</sub> [M-Ag]<sup>-</sup> 477.07949, found 477.07999; Calcd. for C<sub>42</sub>H<sub>26</sub>AgN<sub>12</sub>O<sub>16</sub> [2M-Ag]<sup>-</sup> 1063.06373, found 1063.06587.

### Synthesis of 4b

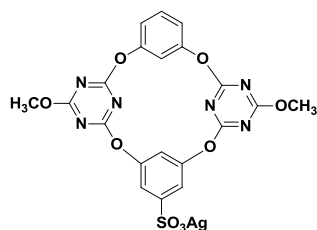

To a solution of **3b** (17 mg, 0.03 mmol) in methanol (10 mL) was added a solution of silver nitrate (44 mg, 0.26 mmol) in DMF (5 mL), the resulting mixture was stirred for 15 minutes at room temperature, then filtered to give compound **4b** (18 mg, 96%) as a white solid:  $^1\text{H}$  NMR (400 MHz,  $d_6$ -DMSO, ppm) 7.37 (t,  $J = 8$  Hz, 1H), 7.10-7.08 (m, 4H), 7.02-7.00 (dd,  $J_1 = 2$  Hz,  $J_2 = 8$  Hz, 2H), 4.04 (s, 6H);  $^{13}\text{C}$  NMR (100 MHz,  $d_6$ -DMSO, ppm) 174.1, 172.5, 172.4, 151.5, 150.8, 150.7, 55.7. HRMS (ESI, negative):  $m/z$  Calcd. for  $\text{C}_{20}\text{H}_{13}\text{N}_6\text{O}_9\text{S} [\text{M-Ag}]^-$  513.04647, found 513.04608; Calcd. for  $\text{C}_{40}\text{H}_{26}\text{AgN}_{12}\text{O}_{18}\text{S}_2 [2\text{M-Ag}]^-$  1134.99770, found 1134.99744.

### Synthesis of 4c

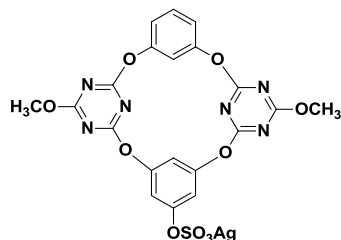

A solution of compound **3c** (150 mg, 0.33 mmol), pyridine sulfur trioxide (530 mg, 3.33 mmol), pyridine (0.27 mL, 3.33 mmol) and anhydrous acetonitrile (25 mL) was heated at reflux for 1 h. After cooling to room temperature, the solution was concentrated, and the residue was redissolved in methanol (30 mL). After filtration, to the filtrate was added a solution of silver nitrate (84 mg, 0.50 mmol) in DMF (10 mL). The mixture was stirred for 15 minutes, then filtered to give the compound **4c** as a white solid (185 mg, 88%):  $^1\text{H}$  NMR (400 MHz,  $d_6$ -DMSO, ppm) 7.38 (t,  $J = 8$  Hz, 1H), 7.11 (s, 1H), 7.04-7.02 (m, 2H), 6.81 (s, 2H), 6.77 (s, 1H), 4.03 (s, 6H);  $^{13}\text{C}$  NMR (100 MHz,  $d_6$ -DMSO, ppm) 174.1, 172.6, 172.3, 154.8, 151.6, 151.4, 130.6, 118.9, 116.4, 110.4, 110.0, 55.7. HRMS (ESI, negative):  $m/z$  Calcd. for  $\text{C}_{20}\text{H}_{13}\text{N}_6\text{O}_{10}\text{S} [\text{M-Ag}]^-$  529.04139, found 529.04161; Calcd. for  $\text{C}_{40}\text{H}_{26}\text{AgN}_{12}\text{O}_{20}\text{S}_2 [2\text{M-Ag}]^-$  1166.98753, found 1166.98807.

**Scheme S2** Synthesis of phosphorylated tetraoxacalix[2]arene[2]triazine **4d**

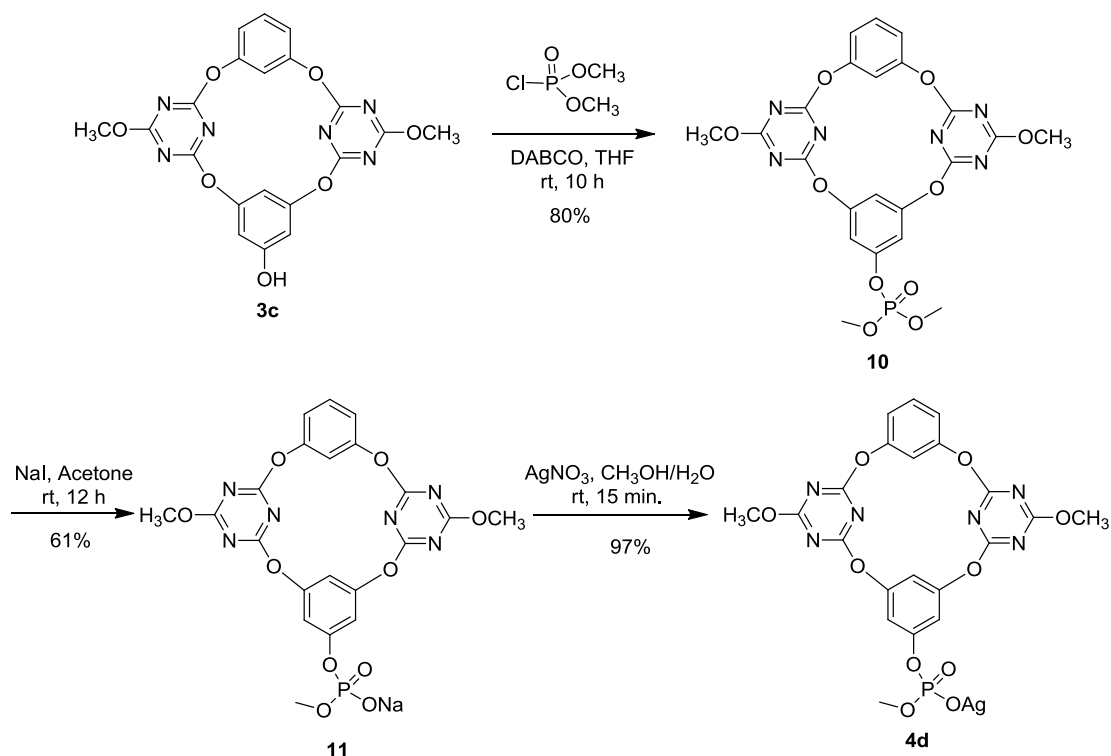

**Synthesis of 10**

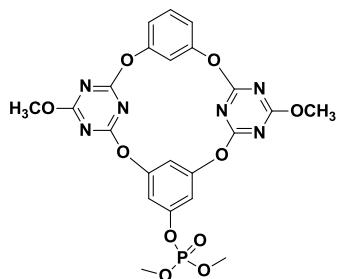

To a solution of **3c** (900 mg, 2 mmol) and 1,4-Diaza[2.2.2]bicyclooctane (DABCO, 336 mg, 3 mmol) in dry THF (25 mL) was added dropwise a solution of dimethyl chlorophosphate (435 mg, 3 mmol) in dry THF (5 mL). The resulting mixture was stirred for 10 h at room temperature, then poured into dichloromethane and washed with aq. HCl (5%) and brine. The organic layer was dried with  $\text{Na}_2\text{SO}_4$  and filtered. The filtrate was concentrated and the residue was purified by silica gel chromatography (100-200 mesh, petroleum/ethyl acetate = 1 : 2) to give compound **10** as a white solid (889 mg, 80%): mp 111-112 °C; IR (KBr) 1586, 1427, 1385, 1361, 1148  $\text{cm}^{-1}$ ;  $^1\text{H}$  NMR (500 MHz,  $\text{CDCl}_3$ , ppm) 7.27 (t,  $J$  = 8 Hz, 1H), 6.90-6.88 (dd,  $J_1$  = 2.5 Hz,  $J_2$  = 8 Hz, 2H), 6.81-6.80 (dd,  $J_1$  = 1 Hz,  $J_2$  = 2 Hz, 2H), 6.71 (t,  $J$  = 2.2 Hz, 1H), 6.58 (t,  $J$  = 1 Hz, 1H), 4.13 (s, 6H), 3.77 (d,  $J$  = 11.5 Hz, 3H);  $^{13}\text{C}$  NMR (100 MHz,  $d_6$ -DMSO, ppm) 174.9, 173.5, 173.3, 152.4, 152.0, 151.6, 151.5, 130.4, 119.4, 116.7, 113.9, 111.8, 111.7, 56.1, 55.3, 55.2; HRMS (ESI, positive):  $m/z$  Calcd. for  $\text{C}_{22}\text{H}_{20}\text{N}_6\text{O}_{10}\text{P}$   $[\text{M}+\text{H}]^+$  559.09809, found 559.09785. Anal. Calcd. for  $\text{C}_{22}\text{H}_{19}\text{N}_6\text{O}_{10}\text{P}$ : C, 47.32; H, 3.43; N, 15.05. Found: C, 46.95; H, 3.43; N, 15.05.



## Synthesis of **11**

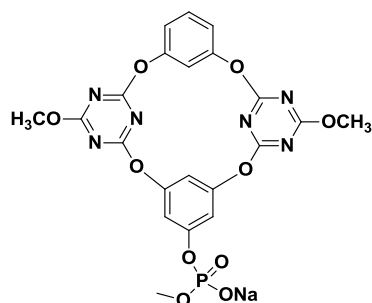

To a solution of **10** (65 mg, 0.1 mmol) in acetone (15 mL) was added sodium iodide (30 mg, 0.2 mmol) and the mixture was stirred at room temperature for 12 h. The solids were collected by filtration and washed by a large excess of ice acetone to give compound **11** as a white solid (38 mg, 61%): mp 235-236 °C; IR (KBr) 1586, 1429, 1386, 1363, 1150  $\text{cm}^{-1}$ ;  $^1\text{H}$  NMR (500 MHz,  $d_6$ -DMSO, ppm) 7.37 (t,  $J = 8$  Hz, 1H), 6.08 (t,  $J = 2$  Hz, 1H), 7.03-7.01 (dd,  $J_1 = 2.5$  Hz,  $J_2 = 8.5$  Hz, 2H), 6.79 (d,  $J = 1.5$  Hz, 1H), 6.63 (t,  $J = 0.5$  Hz, 1H), 4.03 (s, 6H), 3.27 (d,  $J = 11$  Hz, 3H);  $^{13}\text{C}$  NMR (125 MHz,  $d_6$ -DMSO, ppm) 174.1, 172.6, 172.5, 155.7, 155.6, 151.6, 151.4, 130.5, 118.9, 116.5, 109.9, 109.8, 109.1, 55.7, 52.1, 52.0; HRMS (ESI, negative):  $m/z$  Calcd. for  $\text{C}_{21}\text{H}_{16}\text{N}_6\text{O}_{10}\text{P} [\text{M}-\text{Na}]^-$  543.06655, found 543.06665.

## Synthesis of **4d**

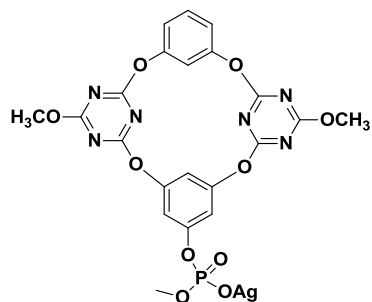

To a solution of **11** (250 mg, 0.44 mmol) in methanol (25 mL) was added a solution of silver nitrate (113 mg, 0.66 mmol) in water (5 mL), the mixture was stirred at room temperature for 15 minutes and filtered to give compound **4d** (279 mg, 97%) as a white solid:  $^1\text{H}$  NMR (400 MHz,  $d_6$ -DMSO, ppm) 7.37 (t,  $J = 8$  Hz, 1H), 7.07 (s, 1H), 7.04-7.02 (m, 2H), 6.81 (s, 1H), 6.68 (s, 1H), 4.03 (s, 6H), 3.32 (d,  $J = 10.8$  Hz, 3H);  $^{13}\text{C}$  NMR (100 MHz,  $d_6$ -DMSO, ppm) 174.1, 172.6, 172.4, 151.6, 151.5, 130.5, 118.9, 116.5, 110.1, 110.0, 109.6, 55.7, 52.4, 52.3. HRMS (ESI, negative):  $m/z$  Calcd. for  $\text{C}_{21}\text{H}_{16}\text{N}_6\text{O}_{10}\text{P} [\text{M}-\text{Ag}]^-$  543.06655, found 543.06704; Calcd. for  $\text{C}_{42}\text{H}_{32}\text{AgN}_{12}\text{O}_{20}\text{P}_2 [2\text{M}-\text{Ag}]^-$  1195.03786, found 1195.03947.

## Synthesis of 5a

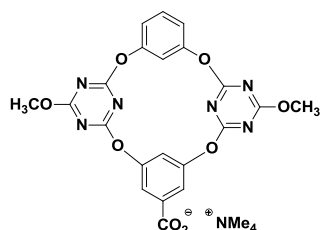

The mixture of compound **4a** (550 mg, 0.94 mmol) and tetramethylammonium chloride (94 mg, 0.86 mmol) in acetonitrile (250 mL) was stirred at room temperature for 10 h. After filtration, the filtrate was concentrated and recrystallized from dichloromethane and hexane to give pure compound **5a** as a white solid (400 mg, 77%): mp 218-219 °C; IR (KBr) 1568, 1485, 1361  $\text{cm}^{-1}$ ;  $^1\text{H}$  NMR (500 MHz,  $d_3$ - $\text{CD}_3\text{CN}$ , ppm) 7.39 (d,  $J = 2.5$  Hz, 2H), 7.33 (t,  $J = 8$  Hz, 1H), 6.95-6.93 (dd,  $J_1 = 2$  Hz,  $J_2 = 8$  Hz, 2H), 6.87 (t,  $J = 2.2$  Hz, 1H), 6.75 (t,  $J = 2.5$  Hz, 1H), 4.05 (s, 6H);  $^{13}\text{C}$  NMR (125 MHz,  $d_3$ - $\text{CD}_3\text{CN}$ , ppm) 175.7, 174.4, 174.1, 167.4, 153.0, 152.1, 146.7, 131.3, 120.0, 119.7, 117.8, 117.0, 56.4, 56.0; HRMS (ESI, negative):  $m/z$  Calcd. for  $\text{C}_{21}\text{H}_{13}\text{N}_6\text{O}_8$   $[\text{M}-\text{NMe}_4]^-$  477.07949, found 477.07941. Anal. Calcd. for  $\text{C}_{21}\text{H}_{14}\text{N}_6\text{O}_8 \cdot 0.25\text{CH}_2\text{Cl}_2$ : C, 52.95; H, 4.49; N, 17.12. Found: C, 52.68; H, 4.79; N, 17.47.

## Synthesis of 5b

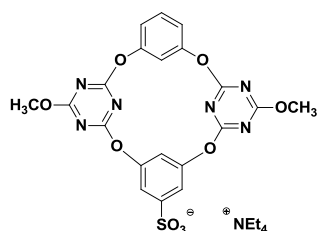

Compound **4b** (91 mg, 0.17 mmol) and tetraethylammonium chloride (26 mg, 0.16 mmol) were dissolved in acetonitrile/methanol (20 mL/20 mL). The resulting solution was stirred at room temperature for 3 h. After filtration, the filtrate was concentrated and recrystallized from dichloromethane/hexane to give pure compound **5b** as a white solid (66 mg, 60%): mp 231-232 °C; IR (KBr) 1573, 1427, 1385, 1361  $\text{cm}^{-1}$ ;  $^1\text{H}$  NMR (500 MHz,  $d_6$ -DMSO, ppm) 7.37 (t,  $J = 8$  Hz, 1H), 7.11-7.08 (m, 4H), 7.02-7.00 (dd,  $J_1 = 2.5$  Hz,  $J_2 = 8$  Hz, 2H), 4.04 (s, 6H), 3.20 (q,  $J = 22$  Hz, 8H), 1.17-1.14 (m, 12H);  $^{13}\text{C}$  NMR (100 MHz,  $d_6$ -DMSO, ppm) 174.1, 172.5, 172.4, 151.5, 150.8, 150.7, 130.6, 118.9, 116.5, 116.3, 115.7, 55.7, 51.4, 7.1; HRMS (ESI, negative):  $m/z$  Calcd. for  $\text{C}_{20}\text{H}_{13}\text{N}_6\text{O}_9\text{S}$   $[\text{M}-\text{NEt}_4]^-$  513.04647, found 513.04602. Anal. Calcd. for  $\text{C}_{28}\text{H}_{33}\text{N}_7\text{O}_9\text{S} \cdot \text{H}_2\text{O}$ : C, 50.82; H, 5.33; N, 14.82, S, 4.85. Found: C, 51.19; H, 5.28; N, 14.88, S, 4.77.

## Synthesis of 5c

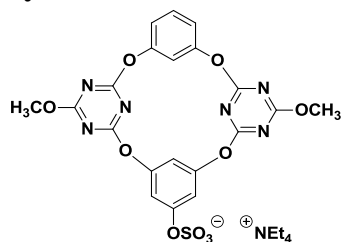

Compound **4c** (170 mg, 0.27 mmol) and tetraethylammonium chloride (40 mg, 0.24 mmol) were dissolved in acetonitrile/methanol (20 mL/20 mL). The mixture was stirred for 3 h at room temperature. After filtration, the filtrate was concentrated and recrystallized from dichloromethane/hexane to afford pure compound **5c** as a white solid (116 mg, 66%): mp 228-229 °C; IR (KBr) 1574, 1428, 1385, 1361 cm<sup>-1</sup>; <sup>1</sup>H NMR (400 MHz, *d*<sub>6</sub>-DMSO, ppm) 7.38 (t, *J* = 8 Hz, 1H), 7.10 (t, *J* = 2.2 Hz, 1H), 7.04-7.01 (dd, *J*<sub>1</sub> = 2.4 Hz, *J*<sub>2</sub> = 8 Hz, 2H), 6.80 (d, *J* = 2 Hz, 2H), 6.76 (t, *J* = 2 Hz, 1H), 4.03 (s, 6H); <sup>13</sup>C NMR (100 MHz, *d*<sub>6</sub>-DMSO, ppm) 174.1, 172.6, 172.4, 154.8, 151.6, 151.4, 130.6, 118.9, 116.4, 110.4, 109.9, 55.7, 51.4, 7.0; HRMS (ESI, negative): *m/z* Calcd. for C<sub>20</sub>H<sub>13</sub>N<sub>6</sub>O<sub>10</sub>S [M-NEt<sub>4</sub>]<sup>-</sup> 529.04139, found 529.04127. Anal. Calcd. for C<sub>28</sub>H<sub>33</sub>N<sub>7</sub>O<sub>10</sub>S 0.5H<sub>2</sub>O: C, 50.29; H, 5.13; N, 14.66, S, 4.80. Found: C, 50.01; H, 5.06; N, 14.61, S, 4.74.

## Synthesis of 5d

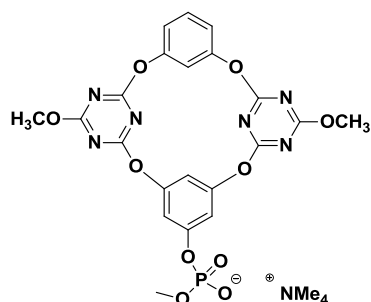

Compound **4d** (300 mg, 0.46 mmol) and tetramethylammonium chloride (46 mg, 0.42 mmol) were dissolved in acetonitrile/methanol (20 mL/20 mL) and the mixture was stirred at room temperature for 3 h. After filtration, the filtrate was concentrated and recrystallized from dichloromethane/hexane to give pure compound **5d** as a white solid (185 mg, 65%): mp 195-196 °C; IR (KBr) 1585, 1574, 1428, 1385, 1362, 1150 cm<sup>-1</sup>; <sup>1</sup>H NMR (500 MHz, *d*<sub>6</sub>-DMSO, ppm) 7.37 (t, *J* = 8 Hz, 1H), 7.08 (s, 1H), 7.03-7.01 (dd, *J*<sub>1</sub> = 2 Hz, *J*<sub>2</sub> = 8 Hz, 2H), 6.78 (d, *J* = 1 Hz, 1H), 6.60 (s, 1H), 4.02 (s, 6H), 3.23 (d, *J* = 11 Hz, 3H), 3.10 (s, 12H); <sup>13</sup>C NMR (125 MHz, *d*<sub>6</sub>-DMSO, ppm) 174.1, 172.6, 172.5, 155.9, 155.8, 151.6, 151.4, 130.5, 118.9, 116.5, 109.8, 108.8, 109.1, 55.7, 54.4, 54.3, 52.0, 51.9; HRMS (ESI, negative): *m/z* Calcd. for C<sub>21</sub>H<sub>16</sub>N<sub>6</sub>O<sub>10</sub>P [M-NMe<sub>4</sub>]<sup>-</sup> 543.06655, found 543.06595. Anal. Calcd. for C<sub>25</sub>H<sub>28</sub>N<sub>7</sub>O<sub>10</sub>P 2.2H<sub>2</sub>O: C, 45.69; H, 4.97; N, 14.92. Found: C, 45.36; H, 4.93; N, 14.85.

### 3. Spectroscopic titrations

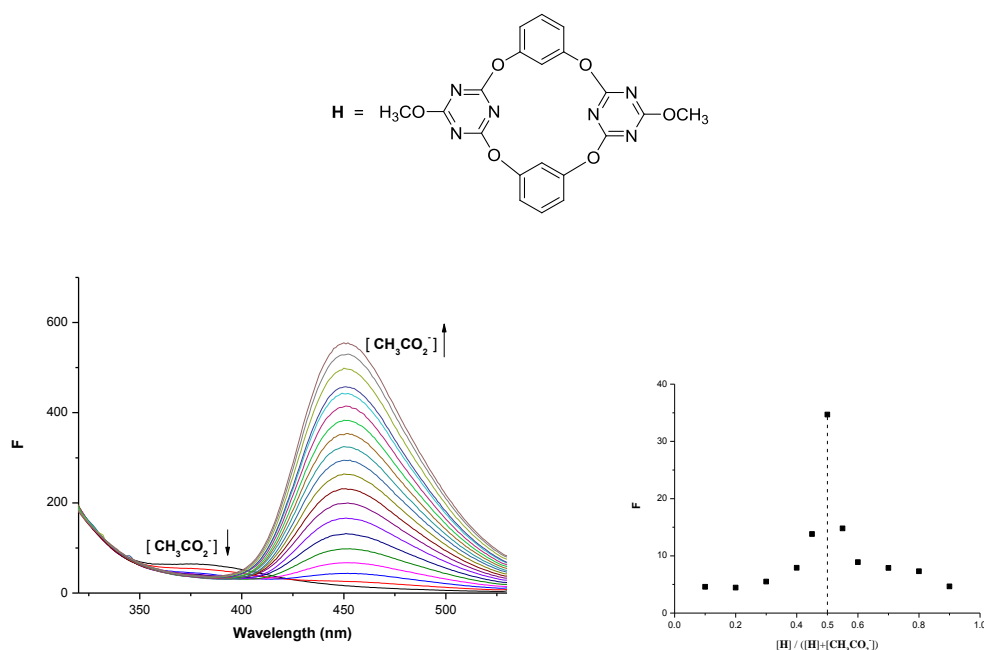

**Figure S1.** Left: Fluorescence titration of **H** ( $2.00 \times 10^{-4}$  M in 2 mL acetonitrile) upon the addition of tetrabutylammonium acetate (0, 0.04, 0.08, 0.12, 0.16, 0.20, 0.24, 0.28, 0.32, 0.36, 0.40, 0.44, 0.48, 0.52, 0.56, 0.60, 0.64, 0.72, 0.8, 0.88, 0.96  $\times 10^{-4}$  M), respectively. The excitation wavelength was 278 nm and the excitation and emission slits were set at 10 nm. Right: Job's plot of the complex of **H** and tetrabutylammonium acetate with a total concentration being  $5.30 \times 10^{-4}$  M. Calculated association constant is  $9598 \text{ M}^{-1}$ .

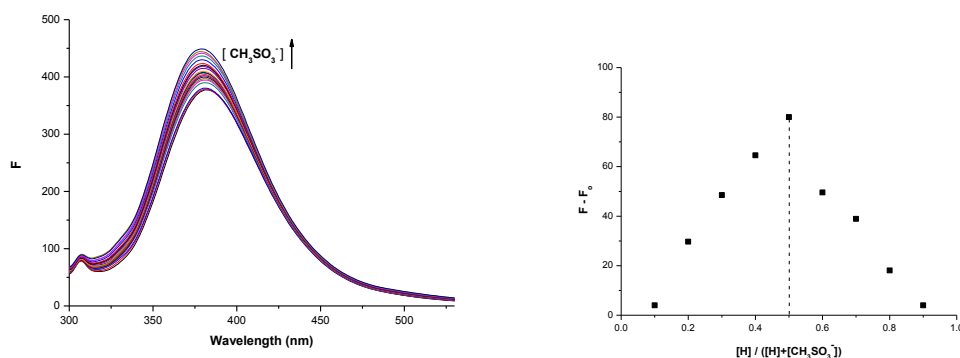

**Figure S2.** Left: Fluorescence titration of **H** ( $5.00 \times 10^{-4}$  M in 2 mL acetonitrile) upon the addition of tetraethylammonium methanesulfonate (0, 0.40, 0.50, 0.80, 0.90, 1.00, 1.10, 1.20, 1.30, 1.40, 1.50, 1.60, 1.70, 1.90, 2.10, 2.30, 2.60, 2.90, 3.20, 3.50  $\times 10^{-3}$  M), respectively. The excitation wavelength was 278 nm and the excitation and emission slits were set at 10 nm. Right: Job's plot of the complex of **H** and tetraethylammonium methanesulfonate with a total concentration being  $5.00 \times 10^{-4}$  M. Calculated association constant is  $1089 \text{ M}^{-1}$ .

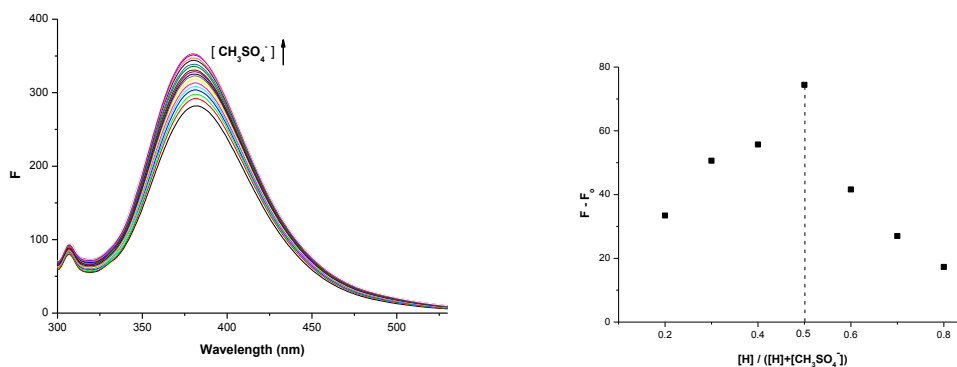

**Figure S3.** Left: Fluorescence titration of **H** ( $5.00 \times 10^{-4}$  M in 2 mL acetonitrile) upon the addition of tetrabutylammonium methylsulfate (0, 0.10, 0.20, 0.30, 0.40, 0.50, 0.60, 0.70, 0.80, 0.90, 1.00, 1.10, 1.20, 1.30, 1.40, 1.50, 1.60, 1.70  $\times 10^{-3}$  M), respectively. The excitation wavelength was 278 nm and the excitation and emission slits were set at 10 nm. Right: Job's plot of the complex of **H** and tetrabutylammonium methylsulfate with a total concentration being  $5.00 \times 10^{-4}$  M. Calculated association constant is  $2839 \text{ M}^{-1}$ .

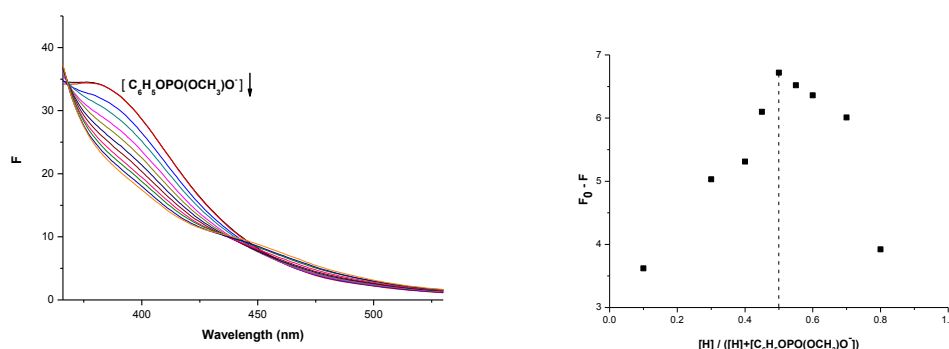

**Figure S4.** Left: Fluorescence titration of **H** ( $2.00 \times 10^{-4}$  M in 2 mL acetonitrile) upon the addition of tetramethylammonium methylphenylphosphate (0, 0.24, 0.44, 0.54, 0.64, 0.74, 0.84, 0.94, 1.04, 1.14, 1.24, 1.34, 1.44, 1.54  $\times 10^{-3}$  M), respectively. The excitation wavelength was 278 nm and the excitation and emission slits were set at 10 nm. Right: Job's plot of the complex of **H** and tetramethylammonium methylphenylphosphate with a total concentration being  $2.00 \times 10^{-4}$  M. Calculated association constant is  $1131 \text{ M}^{-1}$ .

#### 4. Fluorescent spectra of 5a-5d

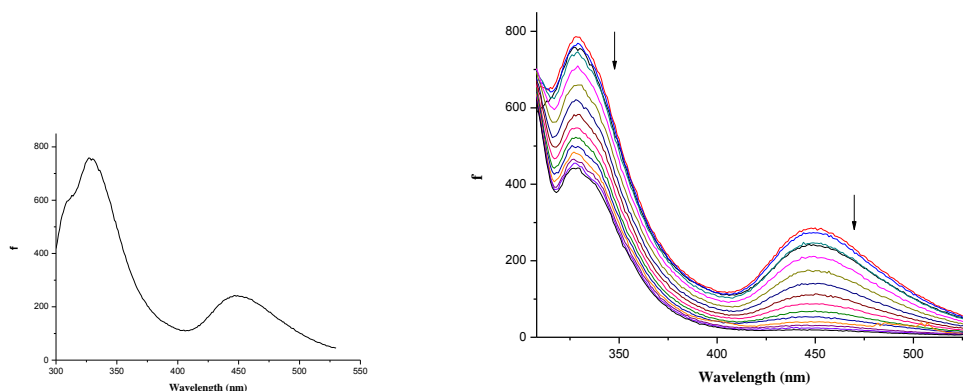

**Figure S5.** Fluorescent spectroscopy of **5a**. Left:  $10^{-3}$  M in  $\text{CH}_3\text{CN}$ . Right: Fluorescent intensity changes in the range of  $1.0 \times 10^{-3}$  to  $1.3 \times 10^{-5}$  M,  $\text{ex} = 278$  nm.

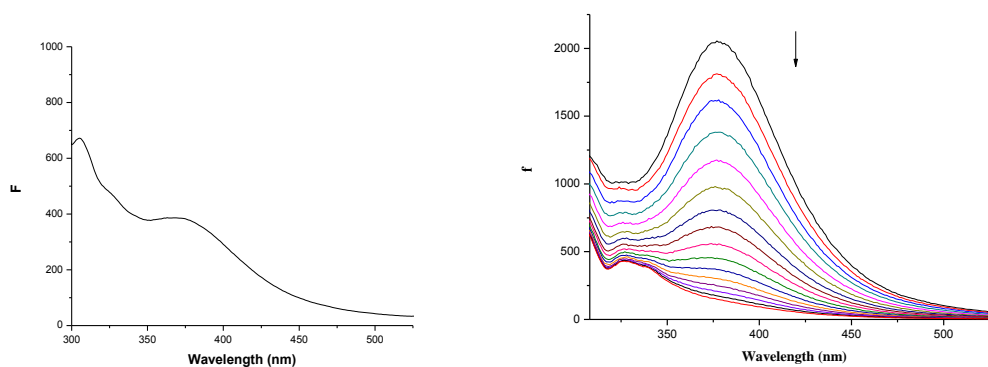

**Figure S6.** Fluorescent spectroscopy of **5b**. Left:  $10^{-3}$  mol/L in  $\text{CH}_3\text{CN}$ . Right: Fluorescent intensity changes in the range of  $1.0 \times 10^{-3}$  to  $1.3 \times 10^{-5}$  M,  $\text{ex} = 278$  nm.

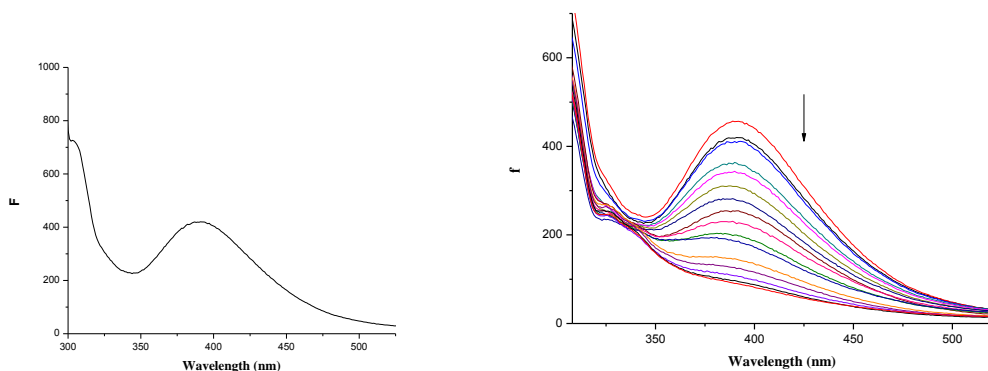

**Figure S7.** Fluorescent spectroscopy of **5c**. Left:  $10^{-3}$  mol/L in  $\text{CH}_3\text{CN}$ . Right: Fluorescent intensities change in the range of  $1.0 \times 10^{-3}$  to  $1.3 \times 10^{-5}$  M,  $\text{ex} = 278$  nm.

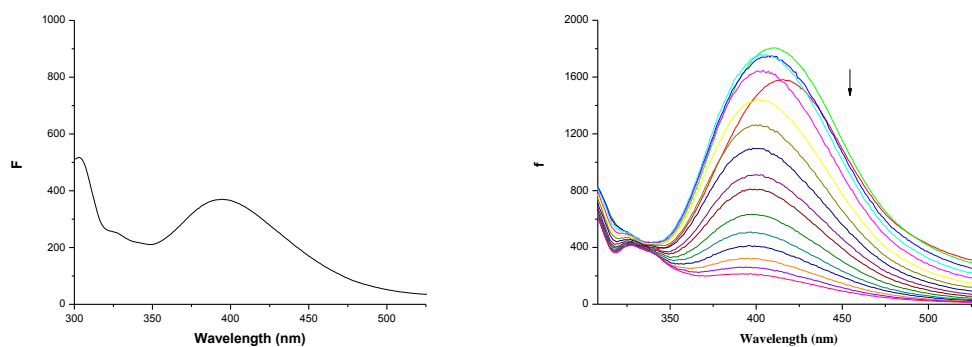

**Figure S8.** Fluorescent spectroscopy of **5d**. Left:  $10^{-3}$  mol/L in  $\text{CH}_3\text{CN}$ . Right: Fluorescent intensity changes in the range of  $1.0 \times 10^{-3}$  to  $1.3 \times 10^{-5}$  M,  $\text{ex} = 278$  nm.

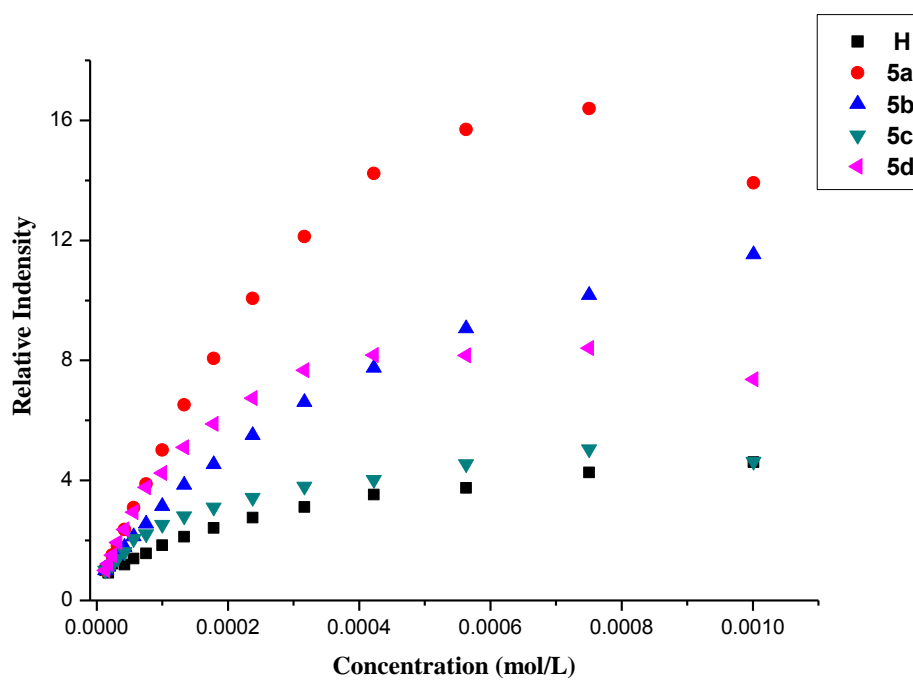

**Figure S9.** Relative fluorescent intensities of **5a-d** and **H** at different concentrations ranging from  $1.0 \times 10^{-3}$  to  $1.3 \times 10^{-5}$  M. The fluorescent intensities for all the compounds at the initial concentrations of  $1.3 \times 10^{-5}$  M were normalized.

## 5. Variable temperature and concentration $^1\text{H}$ NMR spectra of 5a-d

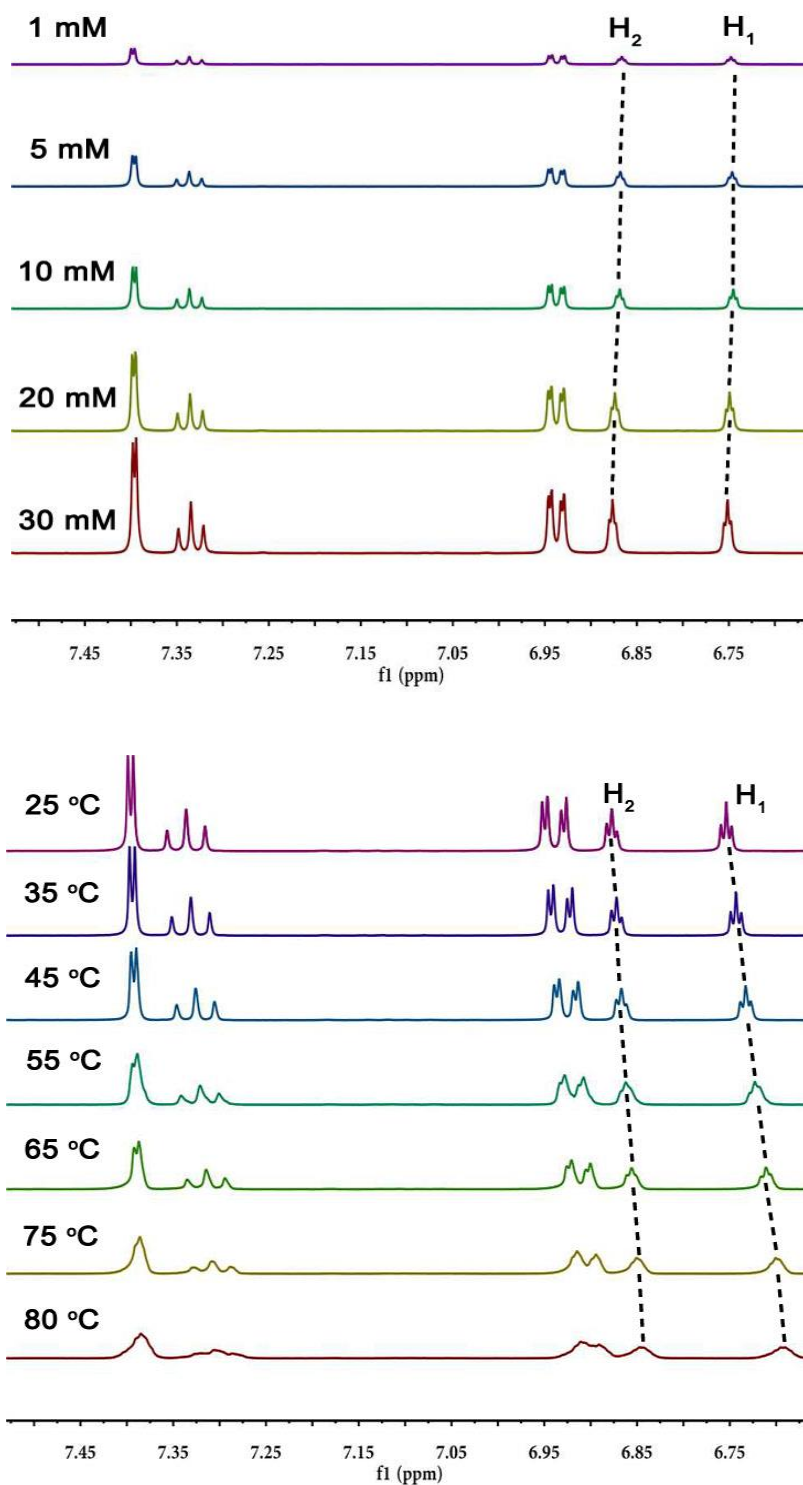

**Figure S10.**  $^1\text{H}$  NMR spectra of **5a** in  $\text{CD}_3\text{CN}$ . Top, variable concentrations (298 K). Bottom, variable temperatures (20 mM).



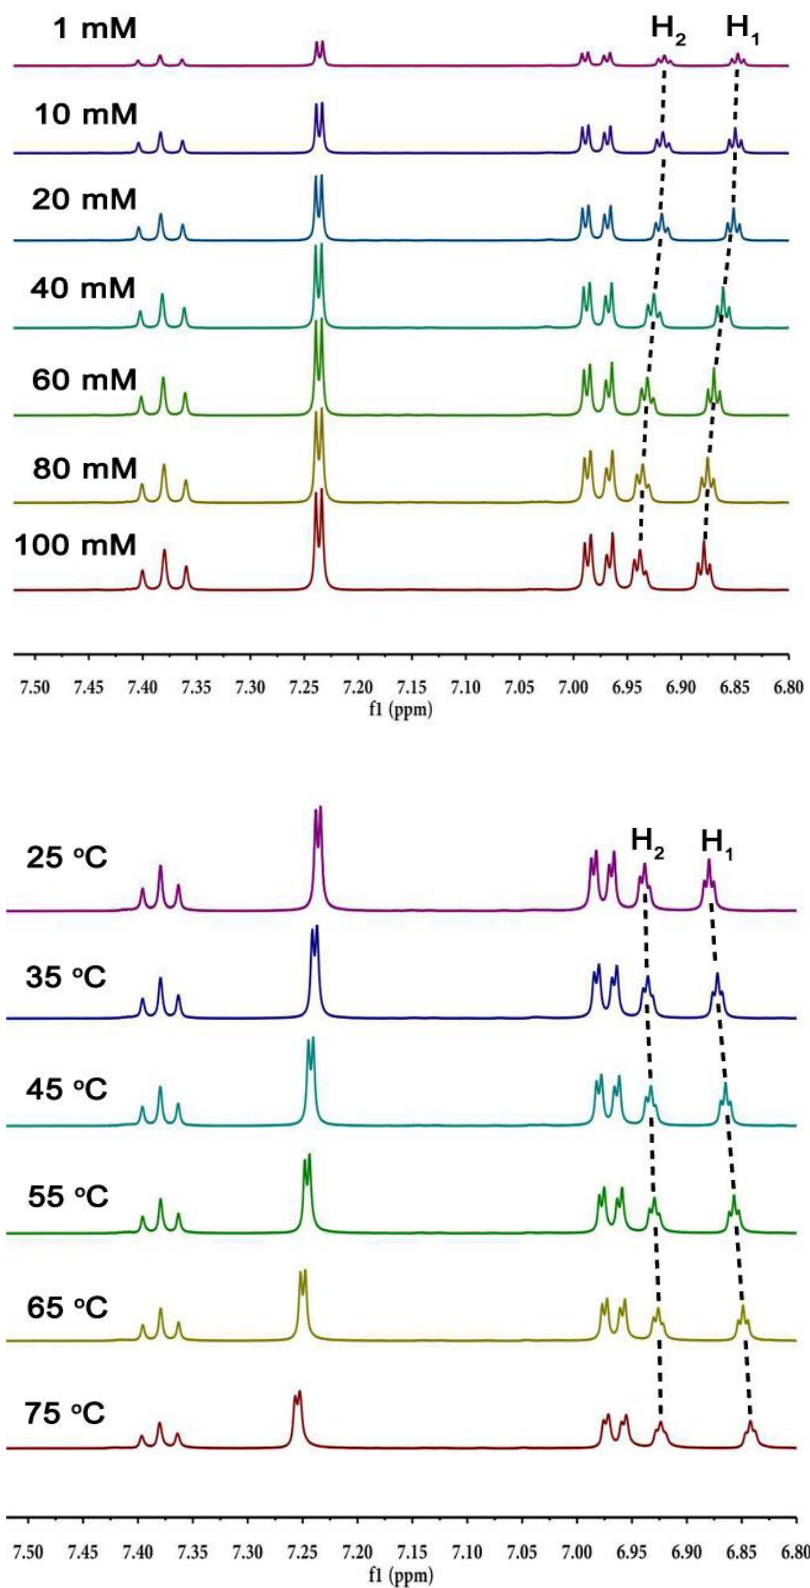

**Figure S11.**  $^1\text{H}$  NMR spectra of **5b** in  $\text{CD}_3\text{CN}$ . Top, variable concentrations (298 K). Bottom, variable temperatures (100 mM).

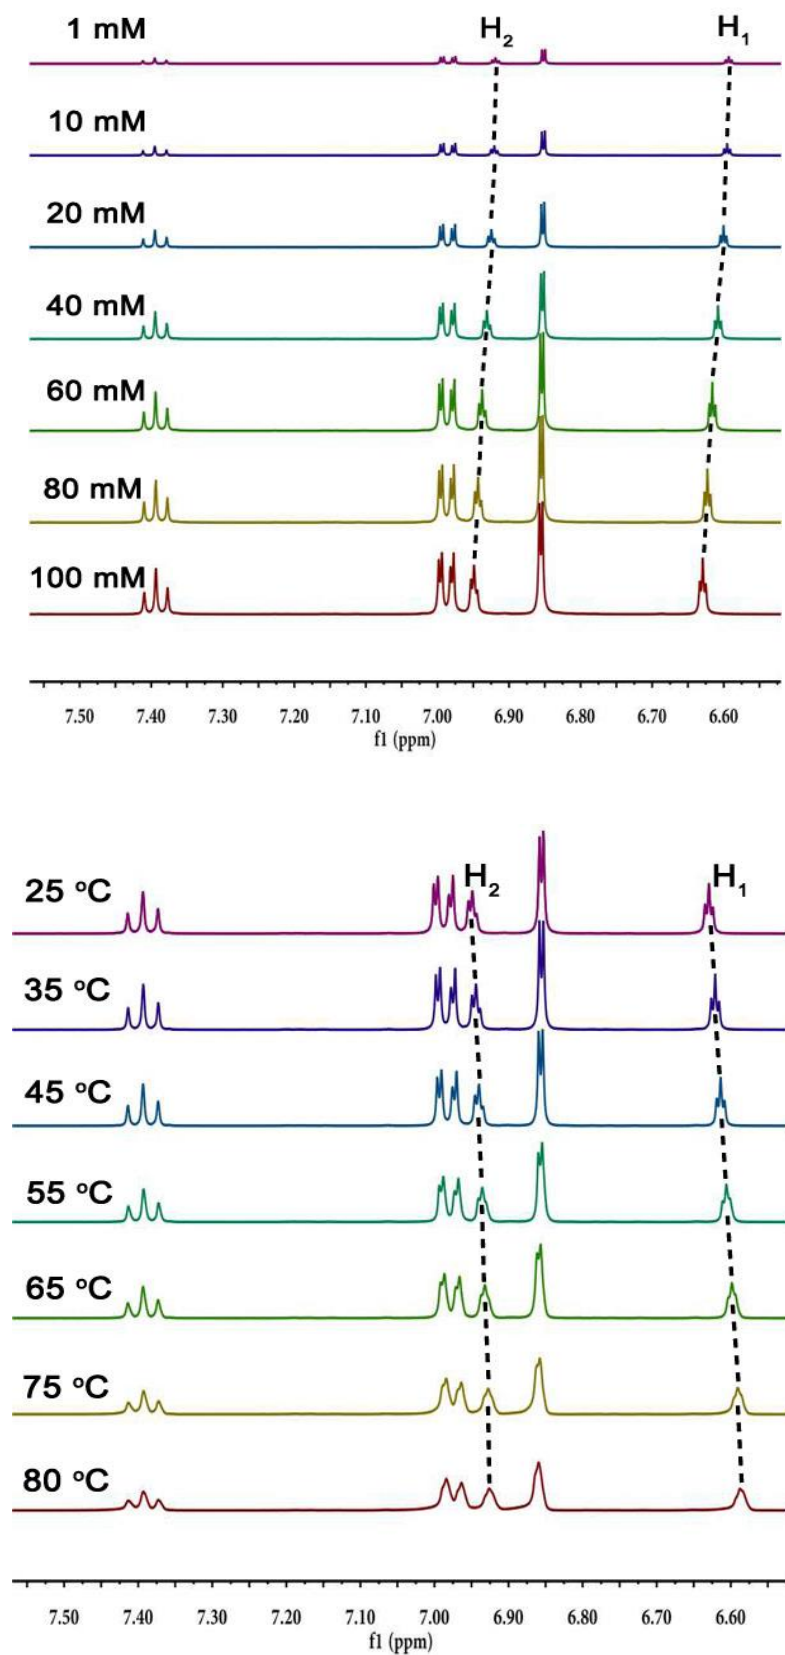

**Figure S12.**  $^1\text{H}$  NMR spectra of **5c** in  $\text{CD}_3\text{CN}$ . Top, variable concentrations (298 K). Bottom, variable temperatures (100 mM).

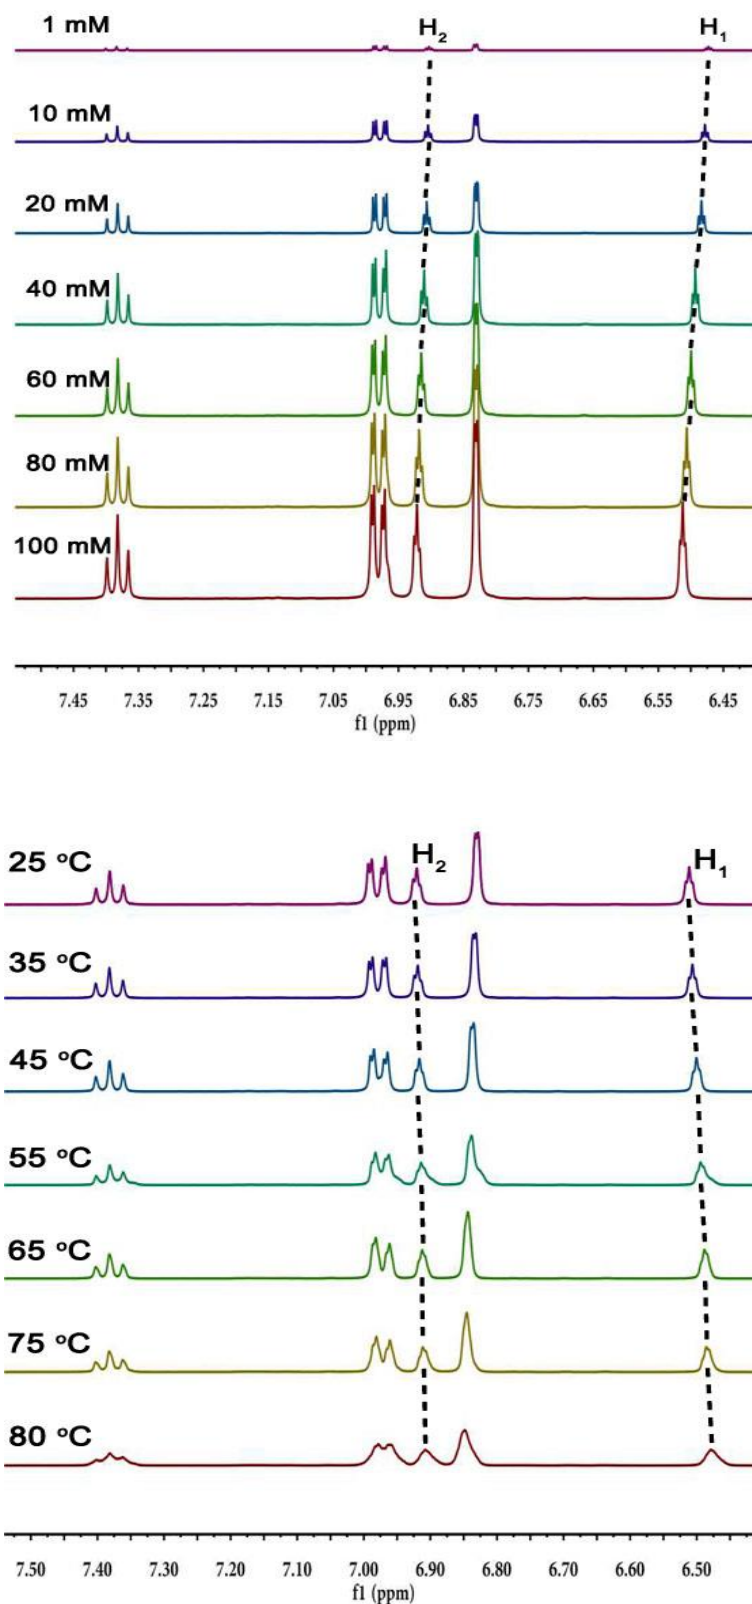

**Figure S13.**  $^1\text{H}$  NMR spectra of **5d** in  $\text{CD}_3\text{CN}$ . Top, variable concentrations (298 K). Bottom, variable temperatures (100 mM).

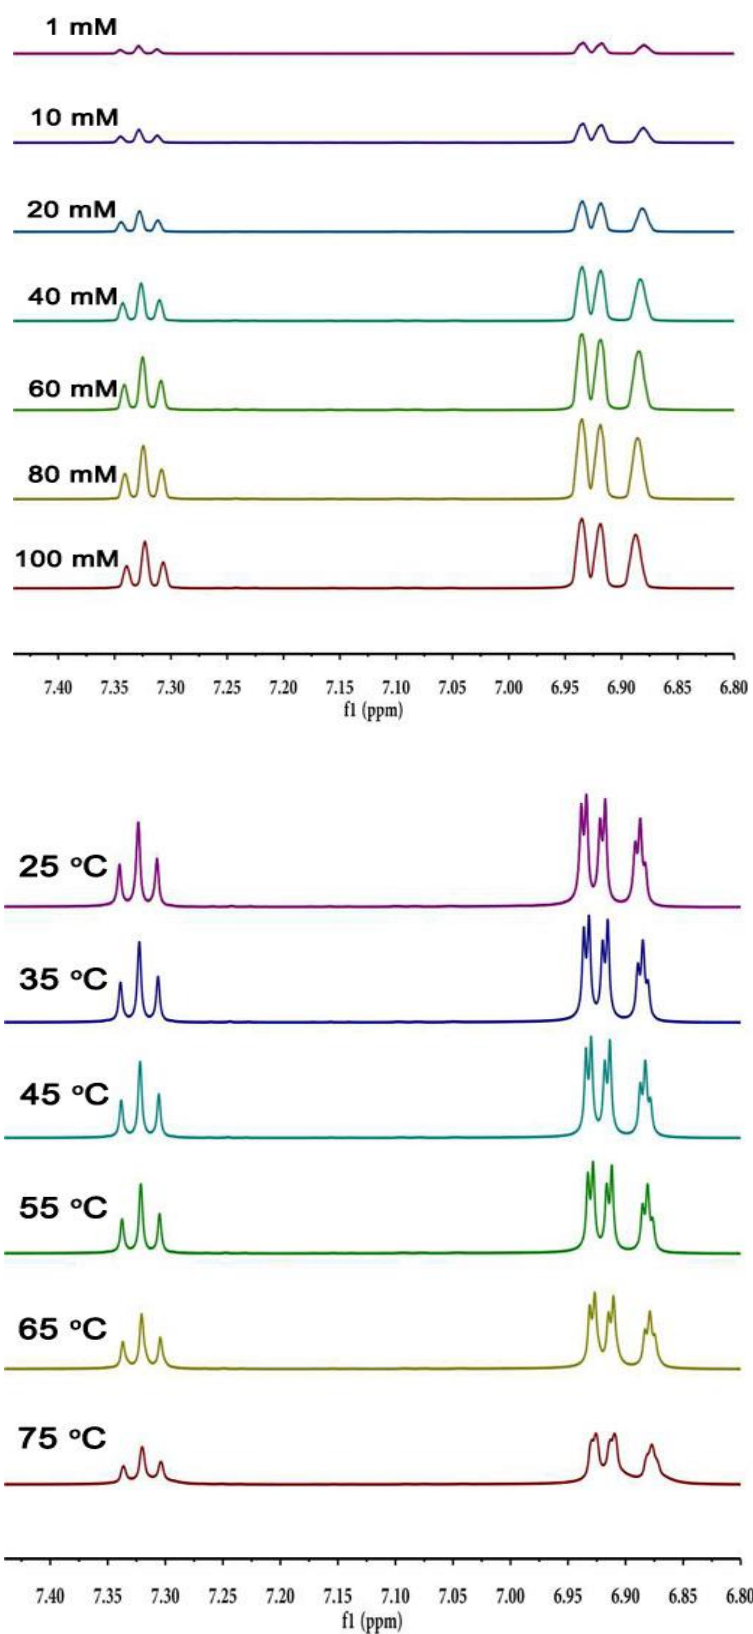

**Figure S14.**  $^1\text{H}$  NMR spectra of **H** in  $\text{CD}_3\text{CN}$ . Top, variable concentrations (298 K). Bottom, variable temperatures (100 mM).

## 6. DOSY results for **5a-d** at variable concentrations

**Table S1.** Diffusion coefficients of **5a** and the solvent  $\text{CD}_2\text{Cl}_2$  at different concentrations

| Concentration<br>(mM) | $D(\mathbf{5a})$<br>( $10^{-10} \text{ m}^2 \text{ S}^{-1}$ ) | $D(\text{CH}_2\text{Cl}_2)$<br>( $10^{-10} \text{ m}^2 \text{ S}^{-1}$ ) | $D(\mathbf{5a})/D(\text{CH}_2\text{Cl}_2)$ |
|-----------------------|---------------------------------------------------------------|--------------------------------------------------------------------------|--------------------------------------------|
| 0.50                  | 7.42                                                          | 27.83                                                                    | 0.27                                       |
| 1.00                  | 7.02                                                          | 27.80                                                                    | 0.25                                       |
| 2.50                  | 6.99                                                          | 27.76                                                                    | 0.25                                       |
| 5.00                  | 6.85                                                          | 28.08                                                                    | 0.24                                       |
| 10.00                 | 6.69                                                          | 27.72                                                                    | 0.24                                       |

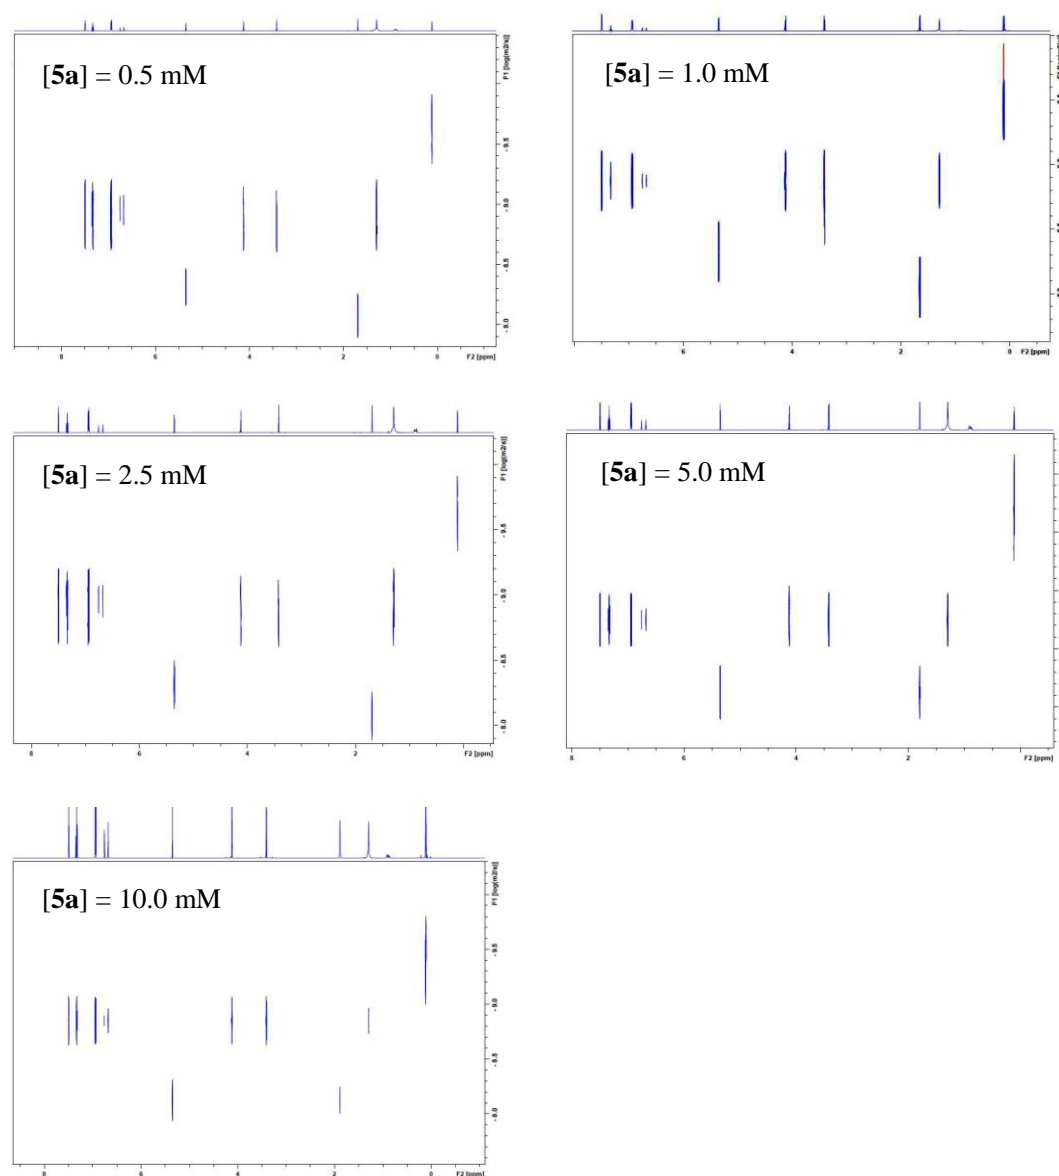

**Figure S15.** DOSY spectra of **5a** at different concentrations (600 MHz,  $\text{CD}_2\text{Cl}_2$ ).

**Table S2.** Diffusion coefficients of **5b** and the solvent CD<sub>2</sub>Cl<sub>2</sub> at different concentrations

| Concentration<br>(mM) | D( <b>5b</b> )<br>(10 <sup>-10</sup> m <sup>2</sup> S <sup>-1</sup> ) | D(CH <sub>2</sub> Cl <sub>2</sub> )<br>(10 <sup>-10</sup> m <sup>2</sup> S <sup>-1</sup> ) | D( <b>5b</b> )/D(CH <sub>2</sub> Cl <sub>2</sub> ) |
|-----------------------|-----------------------------------------------------------------------|--------------------------------------------------------------------------------------------|----------------------------------------------------|
| 1.00                  | 6.60                                                                  | 27.92                                                                                      | 0.24                                               |
| 10.00                 | 6.33                                                                  | 30.40                                                                                      | 0.21                                               |
| 20.00                 | 6.19                                                                  | 29.84                                                                                      | 0.20                                               |
| 30.00                 | 6.08                                                                  | 34.66                                                                                      | 0.18                                               |
| 40.00                 | 5.81                                                                  | 36.89                                                                                      | 0.16                                               |

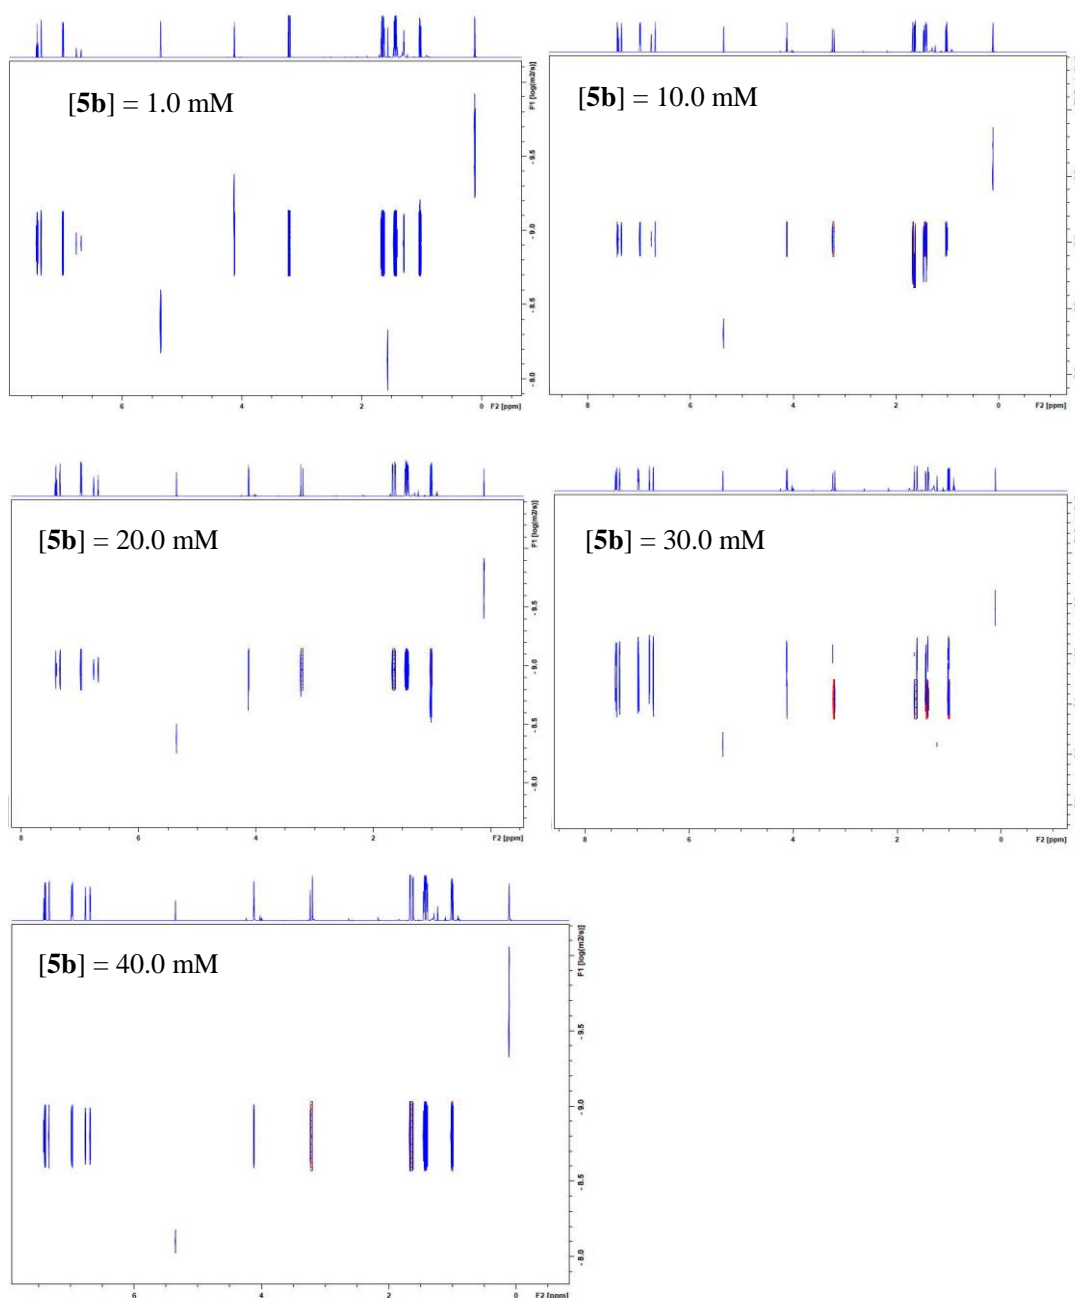

**Figure S16.** DOSY spectra of **5b** at different concentrations (600 MHz, CD<sub>2</sub>Cl<sub>2</sub>).

**Table S3.** Diffusion coefficients of **5c** and the solvent CD<sub>2</sub>Cl<sub>2</sub> at different concentrations

| Concentration<br>(mM) | D( <b>5c</b> )<br>(10 <sup>-10</sup> m <sup>2</sup> S <sup>-1</sup> ) | D(CH <sub>2</sub> Cl <sub>2</sub> )<br>(10 <sup>-10</sup> m <sup>2</sup> S <sup>-1</sup> ) | D( <b>5c</b> )/D(CH <sub>2</sub> Cl <sub>2</sub> ) |
|-----------------------|-----------------------------------------------------------------------|--------------------------------------------------------------------------------------------|----------------------------------------------------|
| 1.00                  | 13.45                                                                 | 37.80                                                                                      | 0.36                                               |
| 5.00                  | 10.62                                                                 | 39.02                                                                                      | 0.27                                               |
| 10.00                 | 10.36                                                                 | 38.77                                                                                      | 0.27                                               |
| 20.00                 | 10.05                                                                 | 39.07                                                                                      | 0.26                                               |
| 30.00                 | 10.05                                                                 | 40.33                                                                                      | 0.25                                               |

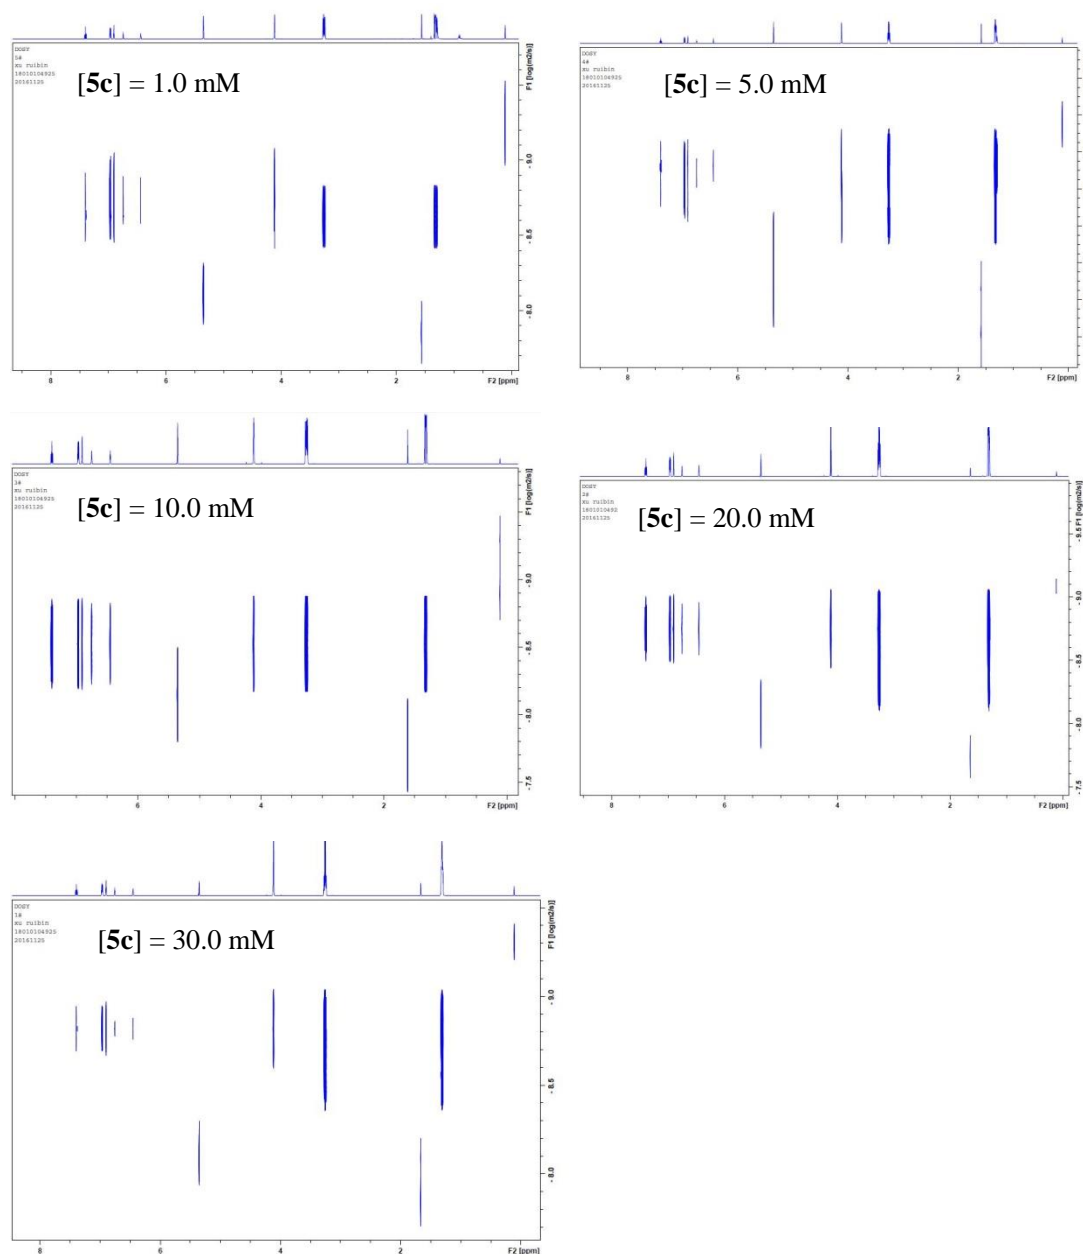

**Figure S17.** DOSY spectra of **5c** at different concentrations (600 MHz, CD<sub>2</sub>Cl<sub>2</sub>).

**Table S4.** Diffusion coefficients of **5d** and the solvent CD<sub>2</sub>Cl<sub>2</sub> at different concentrations

| Concentration<br>(mM) | D( <b>5d</b> )<br>(10 <sup>-10</sup> m <sup>2</sup> S <sup>-1</sup> ) | D(CH <sub>2</sub> Cl <sub>2</sub> )<br>(10 <sup>-10</sup> m <sup>2</sup> S <sup>-1</sup> ) | D( <b>5d</b> )/D(CH <sub>2</sub> Cl <sub>2</sub> ) |
|-----------------------|-----------------------------------------------------------------------|--------------------------------------------------------------------------------------------|----------------------------------------------------|
| 1.00                  | 6.29                                                                  | 29.44                                                                                      | 0.22                                               |
| 5.00                  | 6.03                                                                  | 29.05                                                                                      | 0.21                                               |
| 10.00                 | 6.01                                                                  | 29.51                                                                                      | 0.20                                               |
| 20.00                 | 5.57                                                                  | 34.61                                                                                      | 0.16                                               |
| 30.00                 | 5.33                                                                  | 45.15                                                                                      | 0.12                                               |

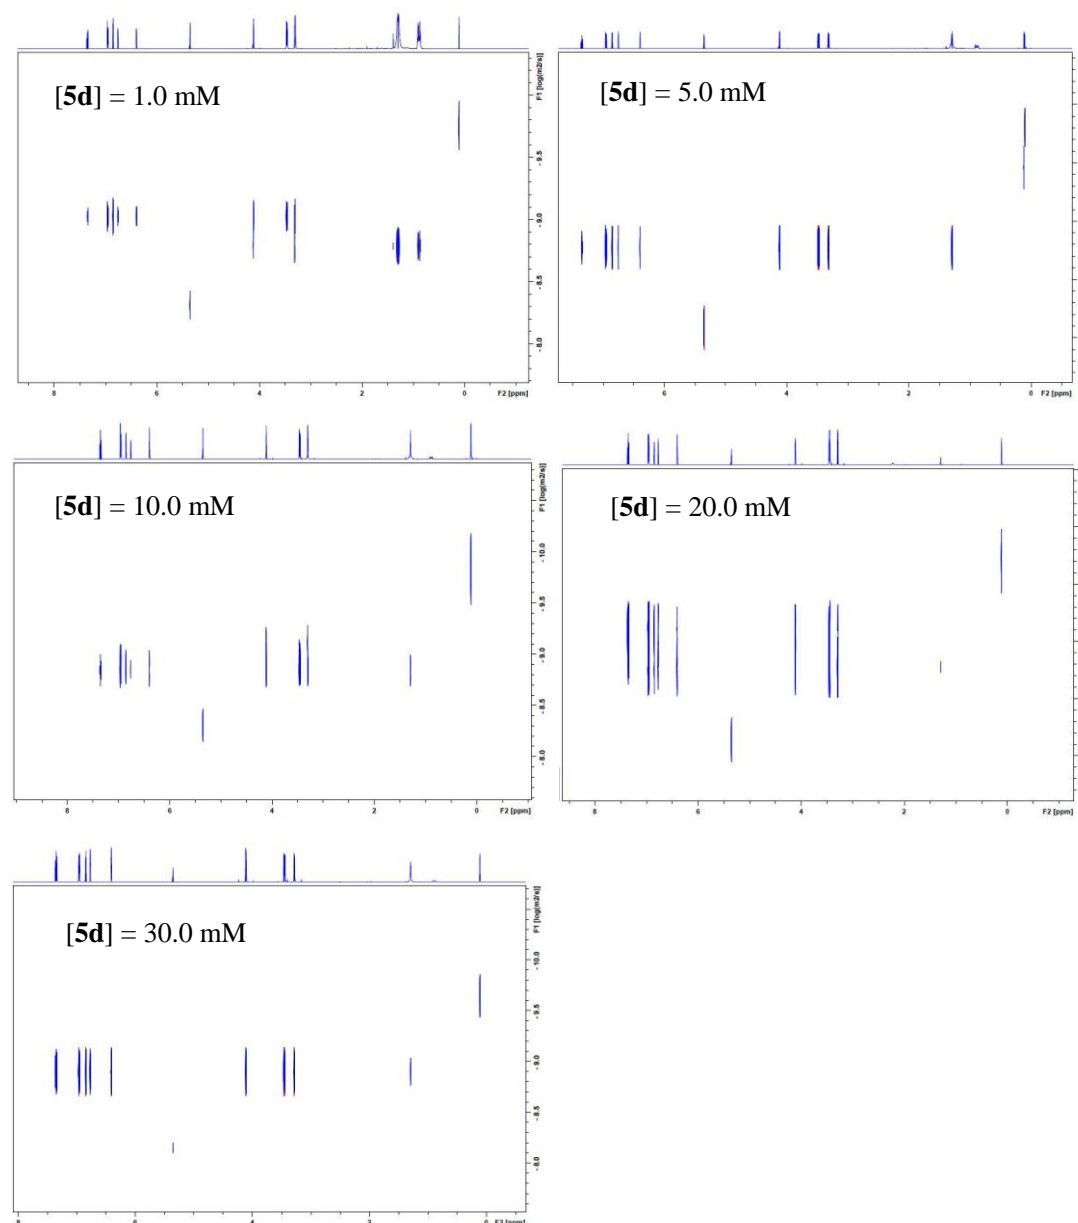

**Figure S18.** DOSY spectra of **5d** at different concentrations (600 MHz, CD<sub>2</sub>Cl<sub>2</sub>).



## 7. DLS measurements for 5a-d at variable concentrations

Measurements were carried out at  $25 \pm 0.5$  °C using an LLS spectrometer (ALV/SP-125) with a multi- $\tau$  digital time correlator (ALV-5000). A solid-state He-Ne laser (output power of 22 mW at  $\lambda = 632.8$  nm) was used as a light source, and the measurements were conducted at a scattering angle of 90 °. The freshly prepared samples were injected into a 7 mL glass bottle. The correlation function of scattering data was analyzed via the CONTIN method to obtain the distribution of diffusion coefficients (D) of the solutes, and then the apparent equivalent hydrodynamic radius ( $R_h$ ) was determined using the Stokes-Einstein equation  $R_h = kT/(6\pi\eta D)$ , where  $k$  is the Boltzmann constant,  $T$  is the Kelvin temperature, and  $\eta$  is viscosity of solvent.

**Table S5.** DLS results for solutions of **5a** in CH<sub>2</sub>Cl<sub>2</sub> over a range of concentrations

| Concentration (mM) | Hydrodynamic radius (nm) |
|--------------------|--------------------------|
| 1.00               | 0.67                     |
| 2.50               | 1.09                     |
| 5.00               | 1.38                     |
| 10.00              | 1.76                     |

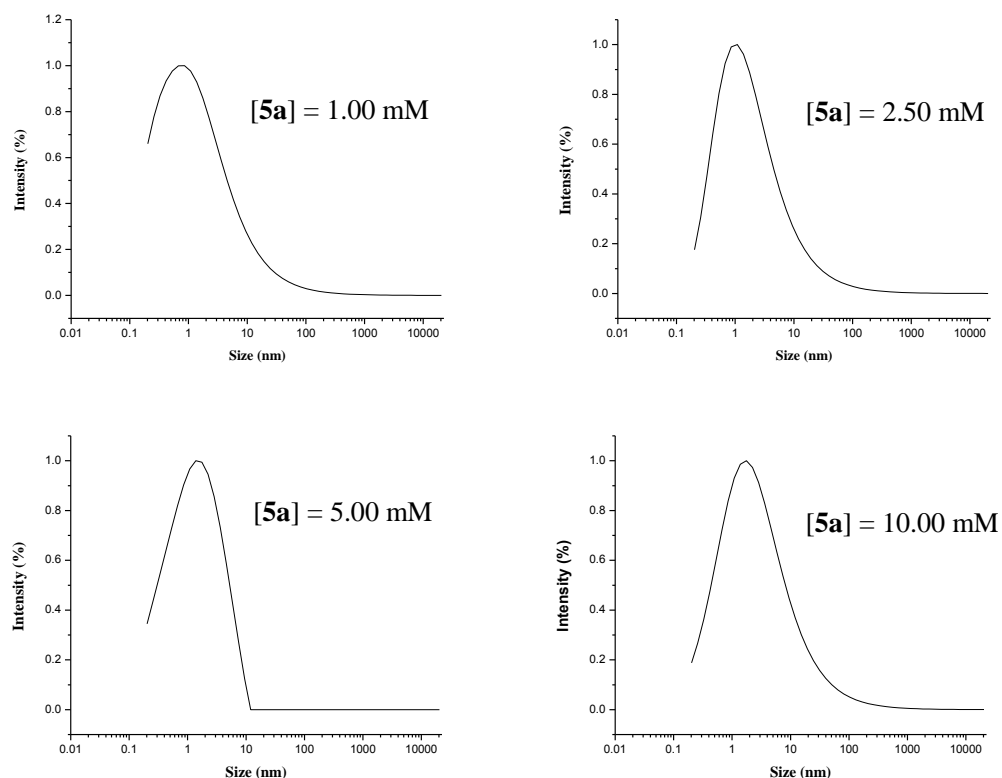

**Figure S19.** DLS measurements of solutions of **5a** in CH<sub>2</sub>Cl<sub>2</sub> over a range of concentrations.

**Table S6.** DLS results for solutions of **5b** in CH<sub>2</sub>Cl<sub>2</sub> over a range of concentrations

| Concentration (mM) | Hydrodynamic radius (nm) |
|--------------------|--------------------------|
| 5.00               | 0.86                     |
| 10.00              | 1.38                     |
| 20.00              | 1.76                     |
| 30.00              | 2.24                     |

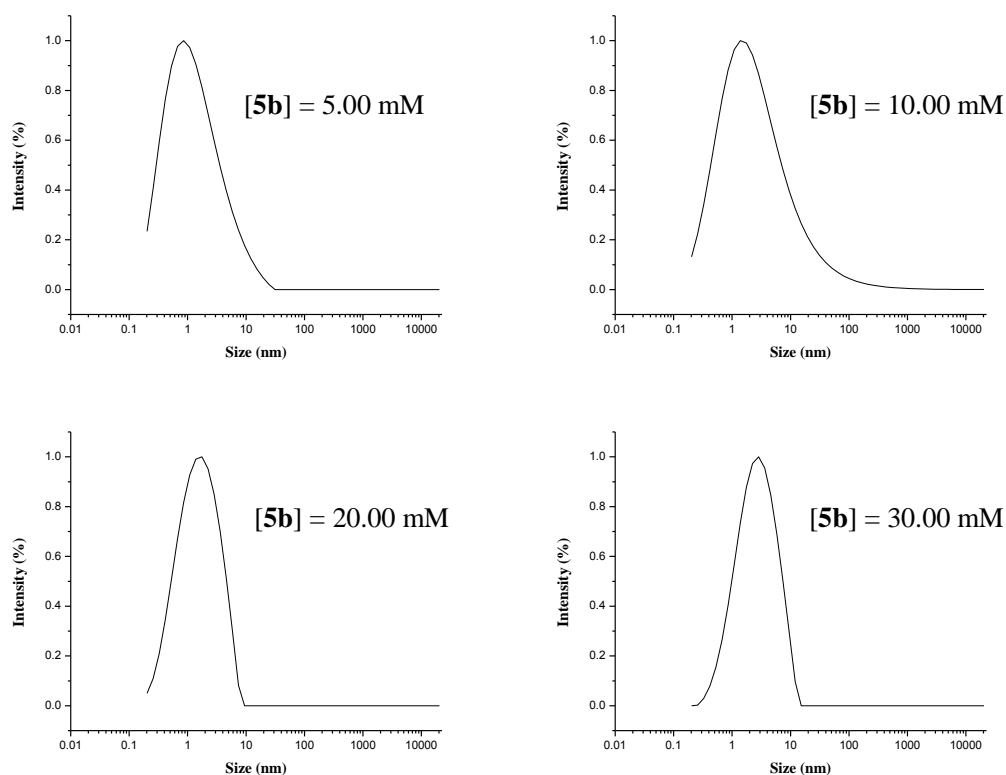

**Figure S20.** DLS measurements of solutions of **5b** in CH<sub>2</sub>Cl<sub>2</sub> over a range of concentrations.

**Table S7.** DLS results for solutions of **5c** in CH<sub>2</sub>Cl<sub>2</sub> over a range of concentrations

| Concentration (mM) | Hydrodynamic radius (nm) |
|--------------------|--------------------------|
| 5.00               | 0.85                     |
| 10.00              | 1.09                     |
| 20.00              | 2.24                     |
| 30.00              | 4.59                     |

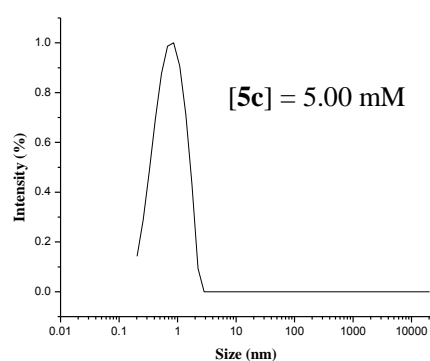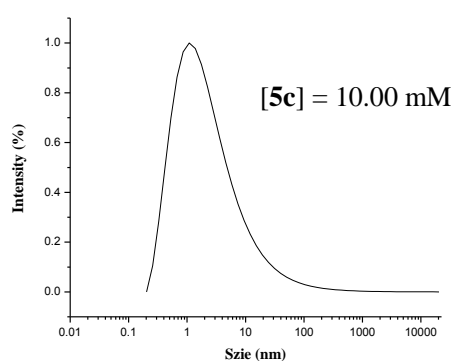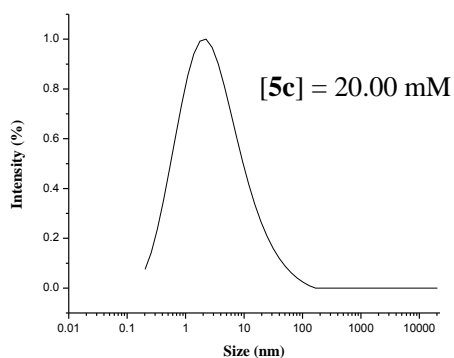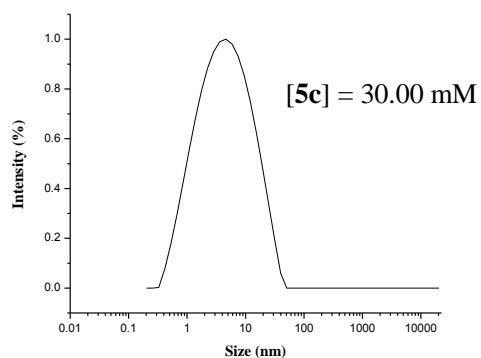

**Figure S21.** DLS measurements of solutions of **5c** in CH<sub>2</sub>Cl<sub>2</sub> over a range of concentrations.

**Table S8.** DLS results for solutions of **5d** in CH<sub>2</sub>Cl<sub>2</sub> over a range of concentrations

| Concentration (mM) | Hydrodynamic radius (nm) |
|--------------------|--------------------------|
| 5.00               | 0.78                     |
| 10.00              | 1.26                     |
| 20.00              | 1.76                     |
| 30.00              | 2.84                     |

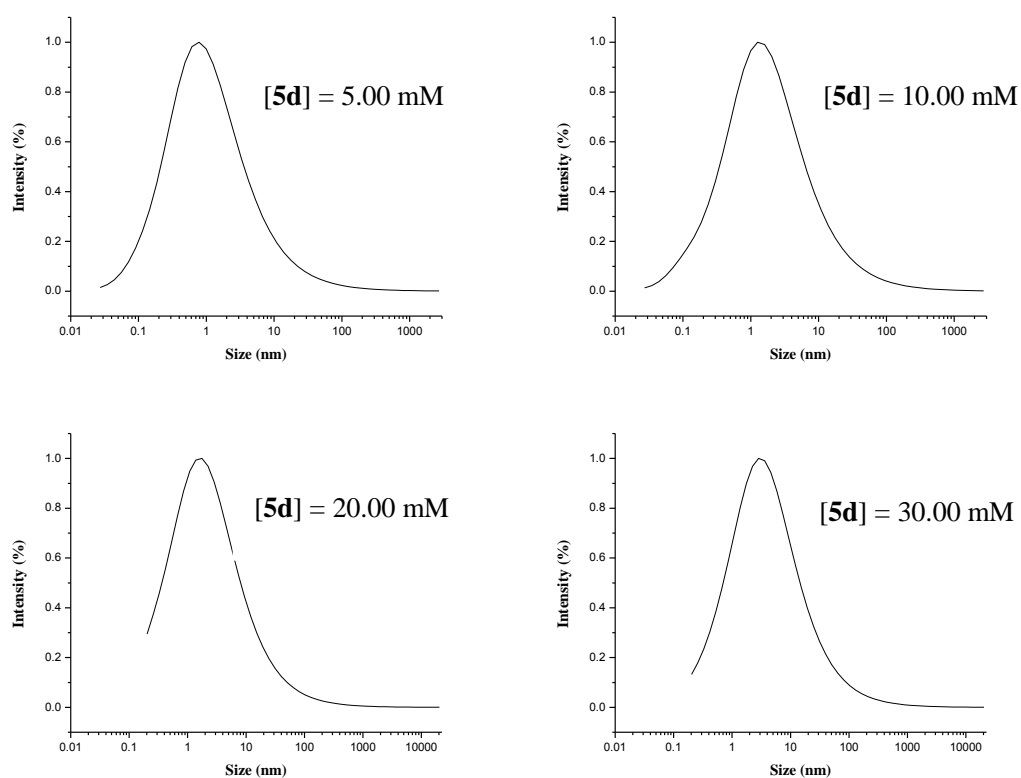

**Figure S22.** DLS measurements of solutions of **5d** in CH<sub>2</sub>Cl<sub>2</sub> over a range of concentrations.

## 8. ESI-MS spectra

### Analysis Info

Analysis Name D:\Data\ESI\2017\2017-01\0116\rb241B\_000001.d

Acquisition Date 1/16/2017 11:23:35 AM

Sample Name xrb241B

Instrument solariX

### Acquisition Parameter

|                     |           |                       |           |                       |                          |
|---------------------|-----------|-----------------------|-----------|-----------------------|--------------------------|
| Acquisition Mode    | Single MS | Acquired Scans        | 10        | Calibration Date      | Tue Jan 10 09:21:34      |
| Polarity            | Positive  | No. of Cell Fills     | 1         | Data Acquisition Size | 2048576                  |
| Broadband Low Mass  | 57.7 m/z  | Source Accumulation   | 0.001 sec | Data Processing Size  | 2097152                  |
| Broadband High Mass | 550.0 m/z | Ion Accumulation Time | 0.050 sec | Apodization           | Sine-Bell Multiplication |

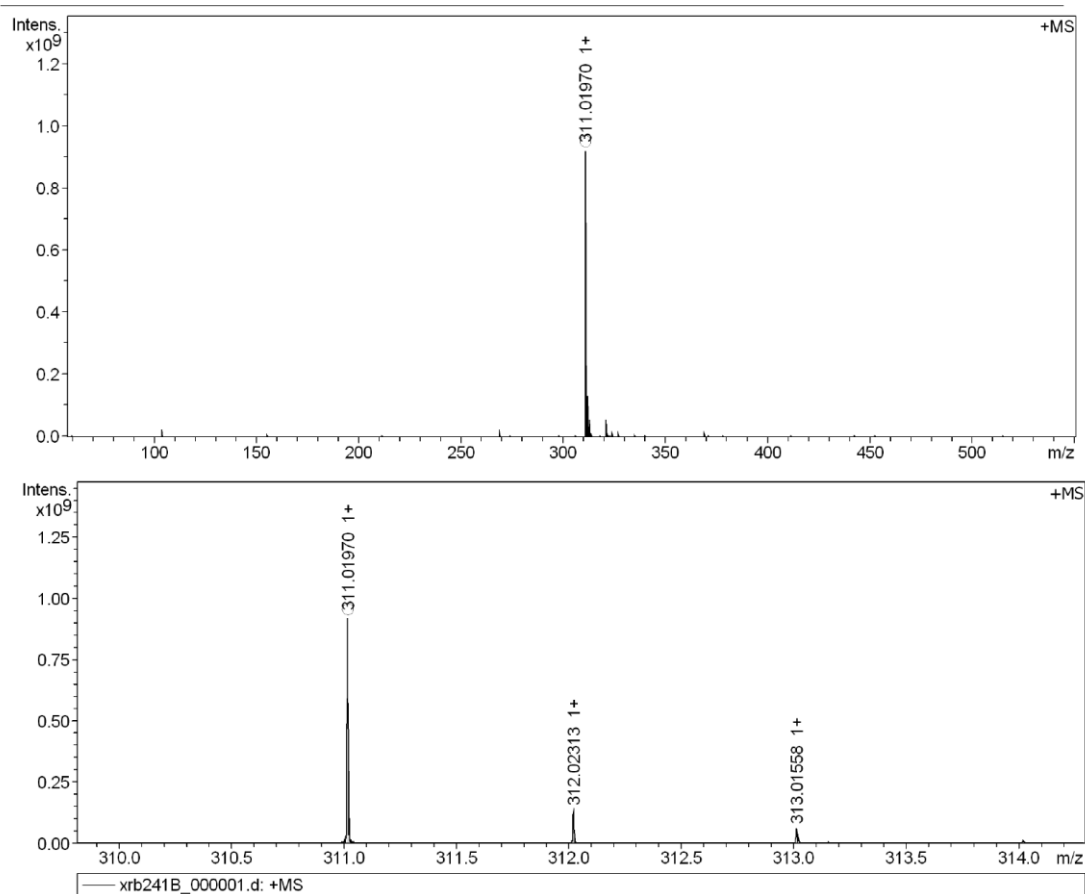

| Meas. m/z  | # | Ion Formula                                        | Score  | m/z        | err [ppm] | Mean err [ppm] | mSigma | rdb | e <sup>-</sup> | Conf | N-Rule |
|------------|---|----------------------------------------------------|--------|------------|-----------|----------------|--------|-----|----------------|------|--------|
| 311.019695 | 1 | C <sub>11</sub> H <sub>12</sub> NaO <sub>7</sub> S | 100.00 | 311.019594 | -0.3      | 0.1            | 6.5    | 5.5 | even           |      | ok     |

**Figure S23.** ESI-MS of **2b**.

1-50A #61 RT: 0.55 AV: 1 NL: 2.04E6  
T: FTMS {1,1} - p ESI Full ms [100.00-1000.00]

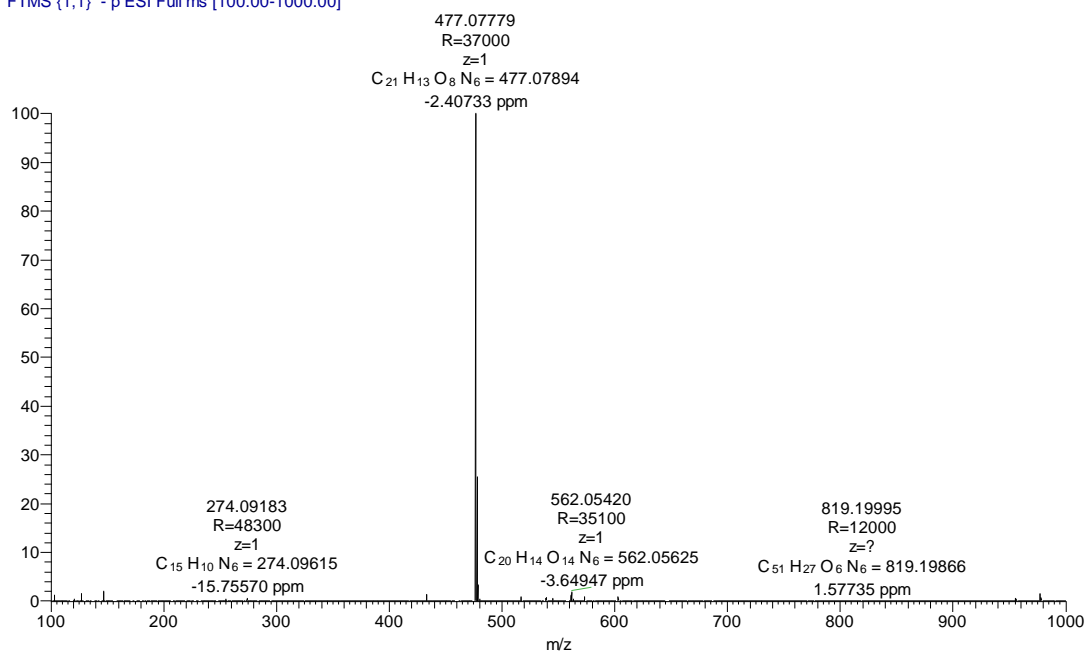

Figure S24. ESI-MS of 3a.

XRB-3-38A-NEG #17 RT: 0.17 AV: 1 NL: 1.88E7  
T: FTMS{1,1} 1 p ESI Full ms [50.00-1000.00]

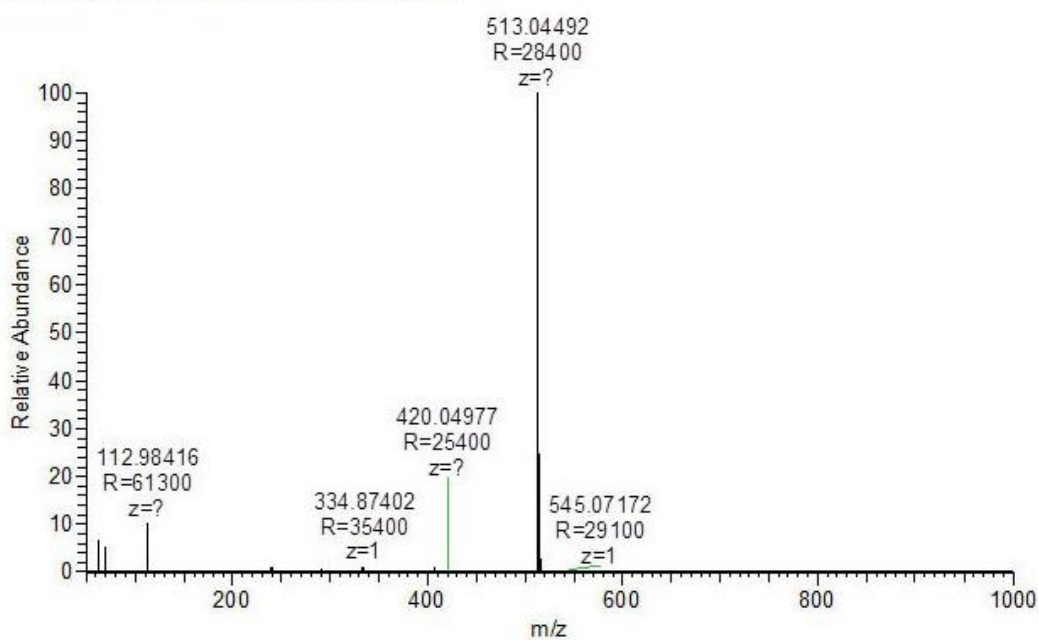

Figure S25. ESI-MS of 3b.

3-26B #12-18 RT: 0.13-0.20 AV: 7 NL: 2.08E5  
T: FTMS {1,1} - p ESI Full ms [100.00-1000.00]

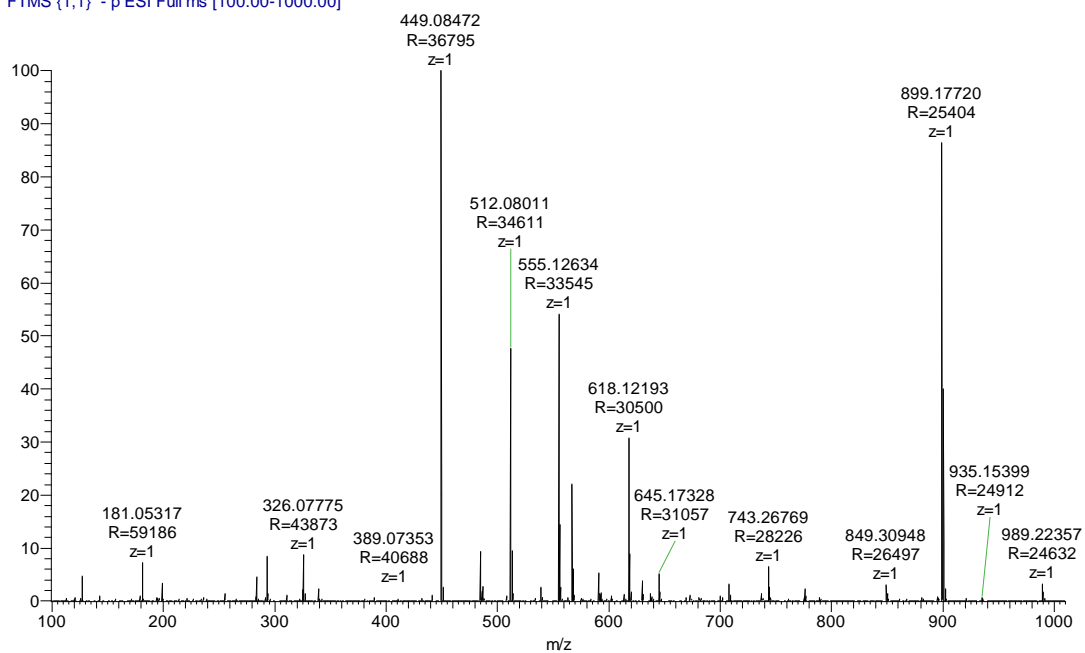

**Figure S26.** ESI-MS of **3c**.

XRBCO2Ag-NEG\_170113111558 #34 RT: 0.31 AV: 1 SB: 33 0.02-0.04 , 0.69-1.02 NL: 2.43E6  
T: FTMS {1,1} - p ESI Full ms [200.00-2000.00]

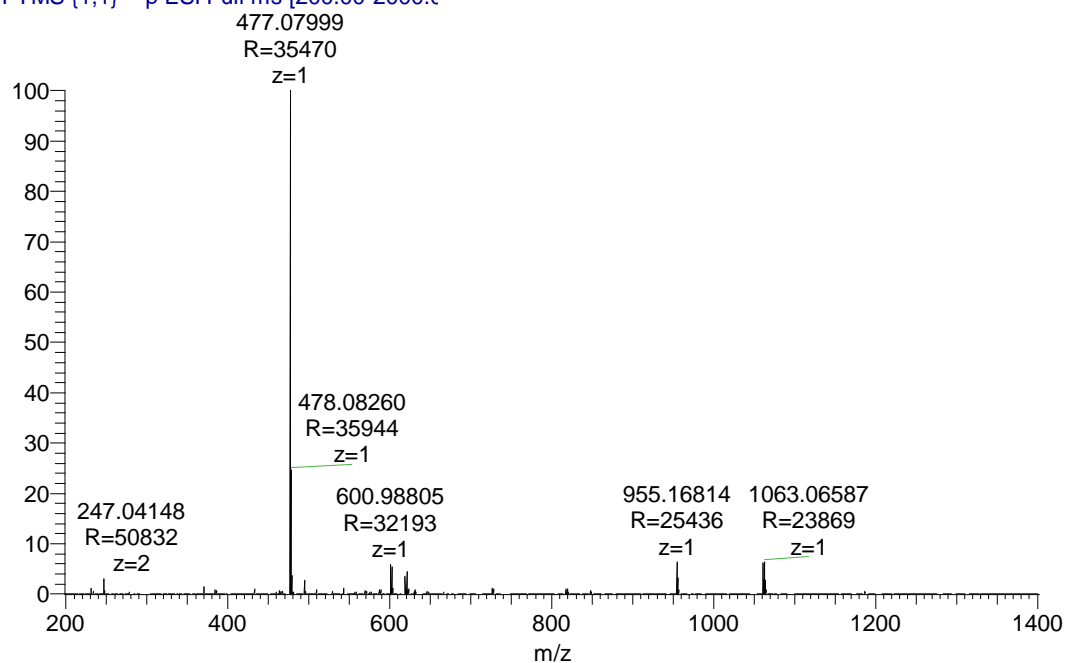

**Figure S27.** ESI-MS of **4a**.

XRBSO3Ag-NEG\_170113102635 #37 RT: 0.30 AV: 1 NL: 2.06E7  
T: FTMS {1,1} - p ESI Full ms [200.00-2000.0]

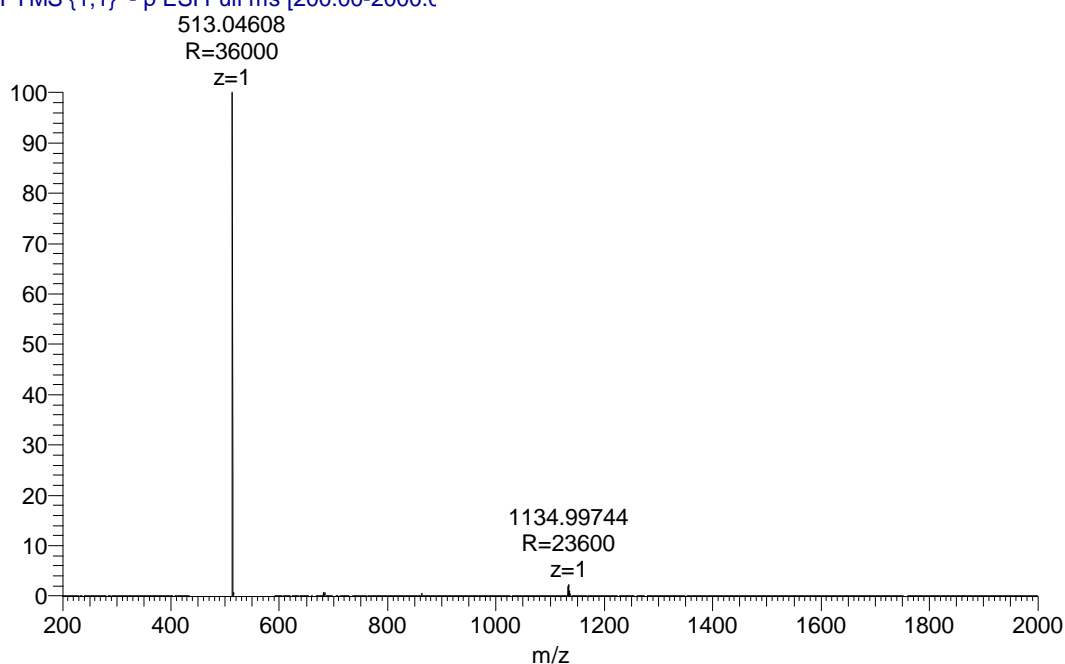

**Figure S28.** ESI-MS of **4b**.

XRBSO4Ag-NEG\_170113103803 #16 RT: 0.15 AV: 1 SB: 17 0.01-0.04 , 0.88-1.02 NL: 2.43E8  
T: FTMS {1,1} - p ESI Full ms [200.00-2000.0]

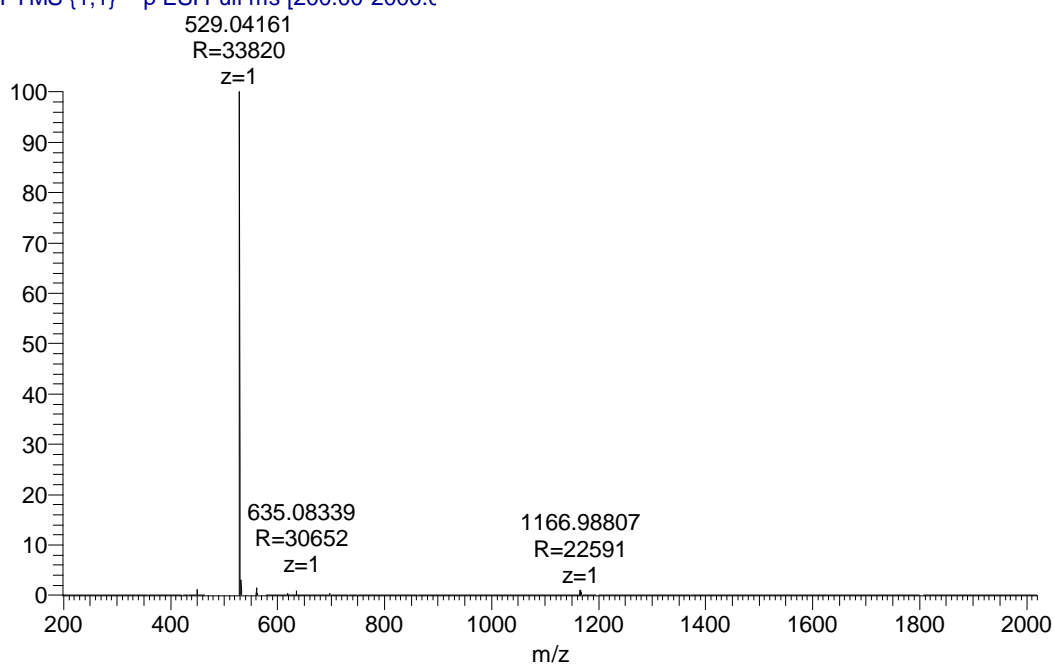

**Figure S29.** ESI-MS of **4c**.



XRBOPOAg-NEG\_170113104927 #19-20 RT: 0.16-0.17 AV: 2 NL: 1.87E8  
T: FTMS {1,1} - p ESI Full ms [200.00-2000.00]

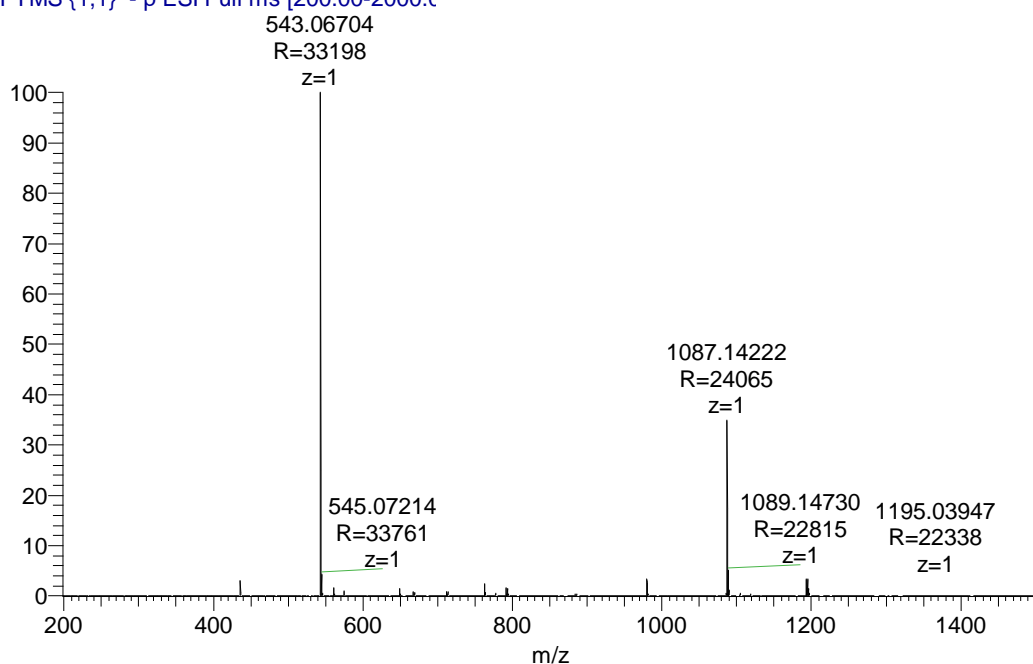

Figure S30. ESI-MS of 4d.

xrb006-neg #14-15 RT: 0.20-0.22 AV: 2 NL: 9.23E7  
T: FTMS {1,1} - p ESI Full ms [200.00-2000.00]

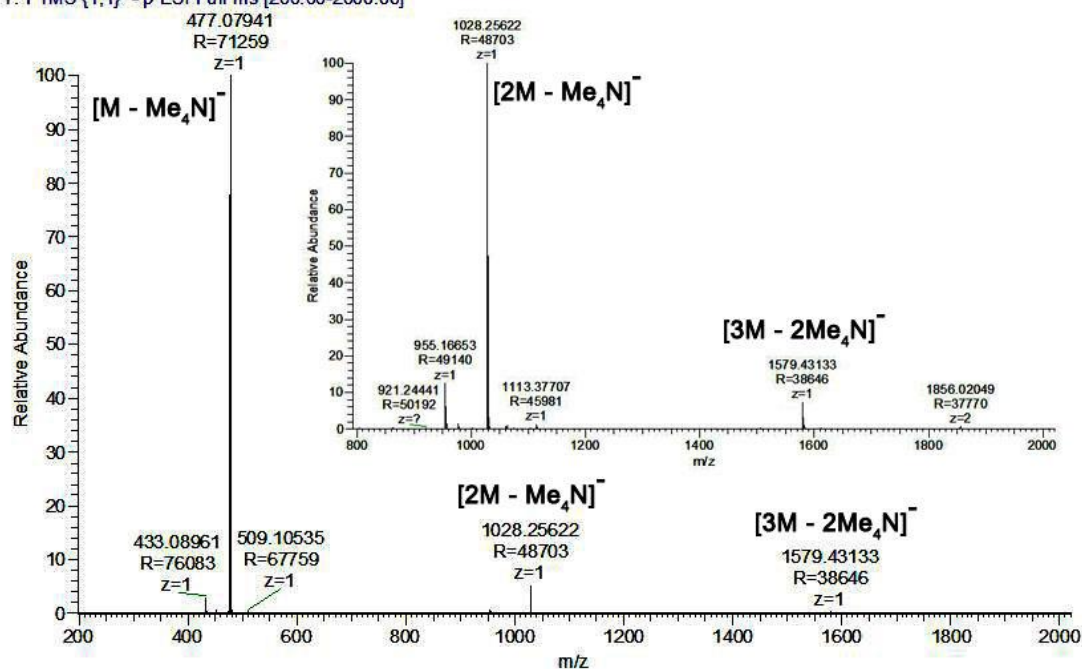

Figure S31. ESI-MS of 5a (inset: enlarged spectrum showing the dimeric and trimeric peaks).

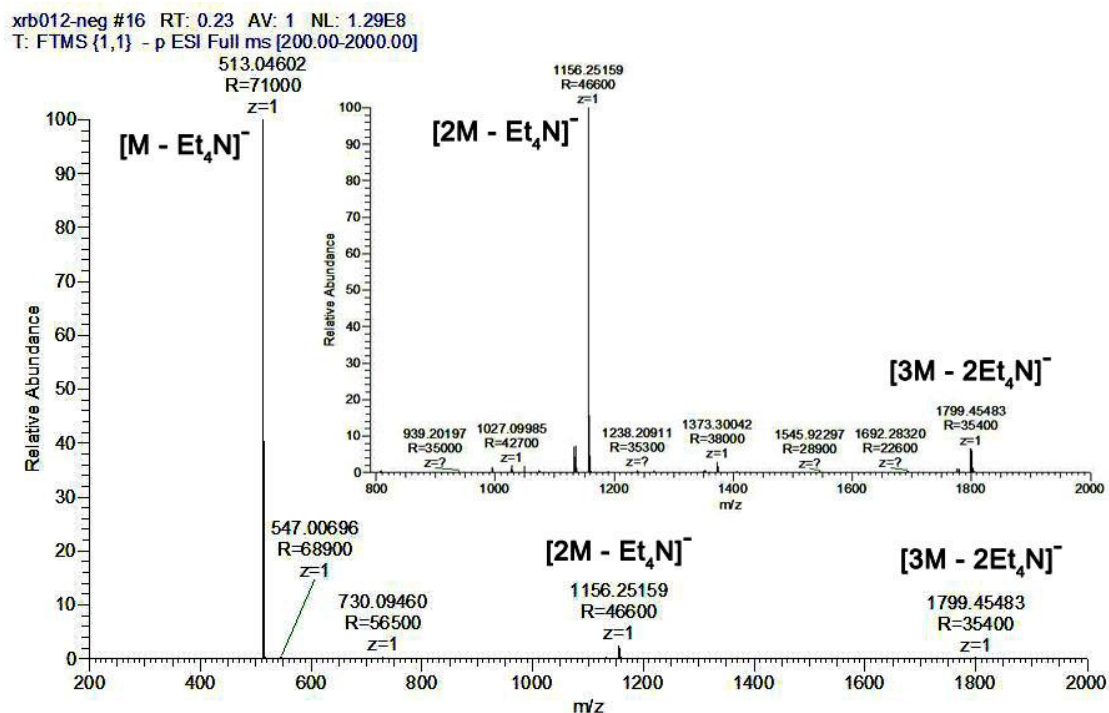

**Figure S32.** ESI-MS of **5b** (inset: enlarged spectrum showing the dimeric and trimeric peaks).

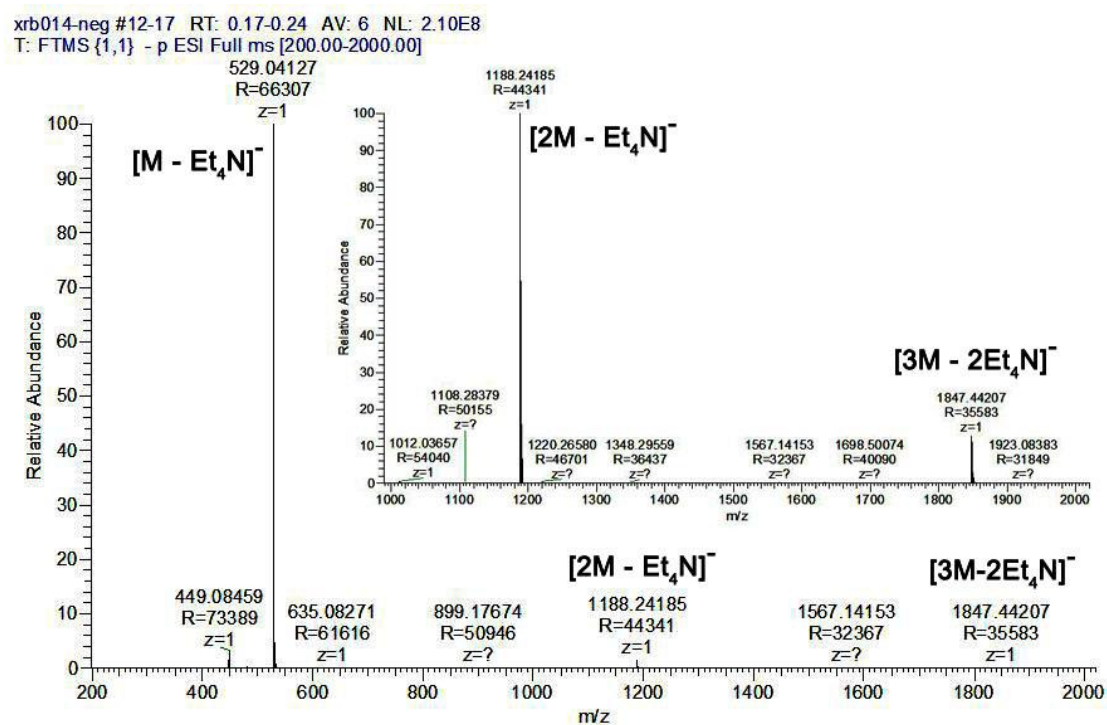

**Figure S33.** ESI-MS of **5c** (inset: enlarged spectrum showing the dimeric and trimeric peaks).

xrb017-neg #17-19 RT: 0.24-0.27 AV: 3 NL: 3.31E7  
T: FTMS {1,1} - p ESI Full ms [200.00-2000.00]

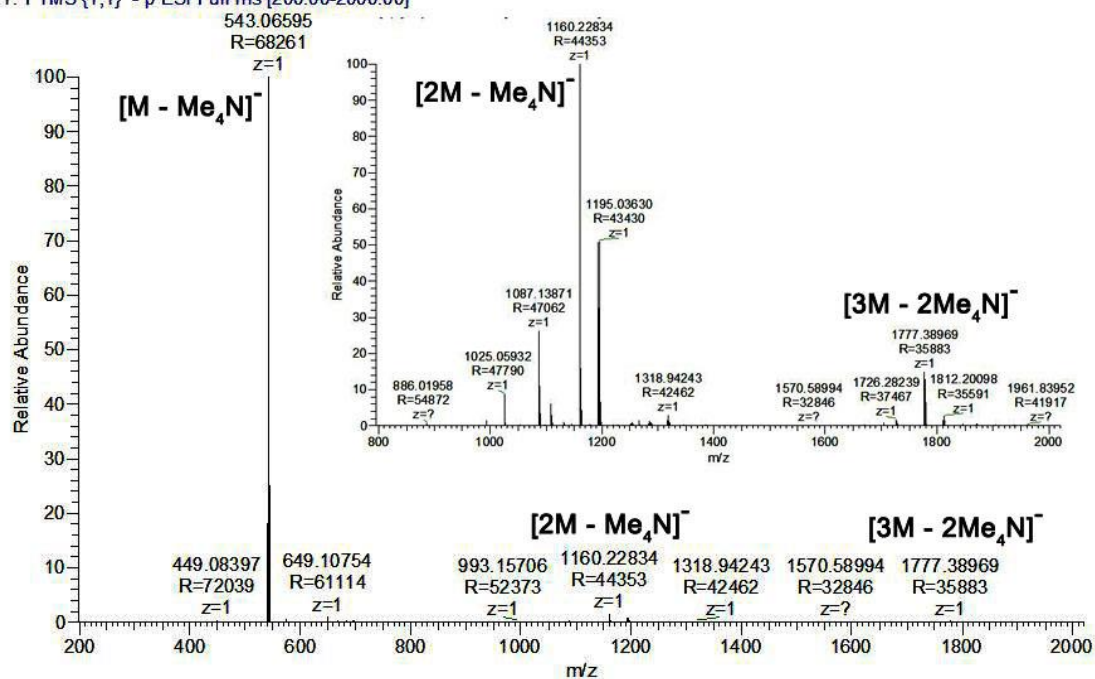

**Figure S34.** ESI-MS of 5d (inset: enlarged spectrum showing the dimeric and trimeric peaks).

# Analysis Info

Analysis Name D:\Data\ESI\2017\2017-01\0116\rb239B\_000001.d

Acquisition Date 1/16/2017 11:42:26 AM

Sample Name xrb239B

Instrument solariX

## Acquisition Parameter

|                     |           |                       |           |                       |                          |
|---------------------|-----------|-----------------------|-----------|-----------------------|--------------------------|
| Acquisition Mode    | Single MS | Acquired Scans        | 10        | Calibration Date      | Tue Jan 10 09:21:34      |
| Polarity            | Positive  | No. of Cell Fills     | 1         | Data Acquisition Size | 2048576                  |
| Broadband Low Mass  | 57.7 m/z  | Source Accumulation   | 0.001 sec | Data Processing Size  | 2097152                  |
| Broadband High Mass | 450.0 m/z | Ion Accumulation Time | 0.050 sec | Apodization           | Sine-Bell Multiplication |

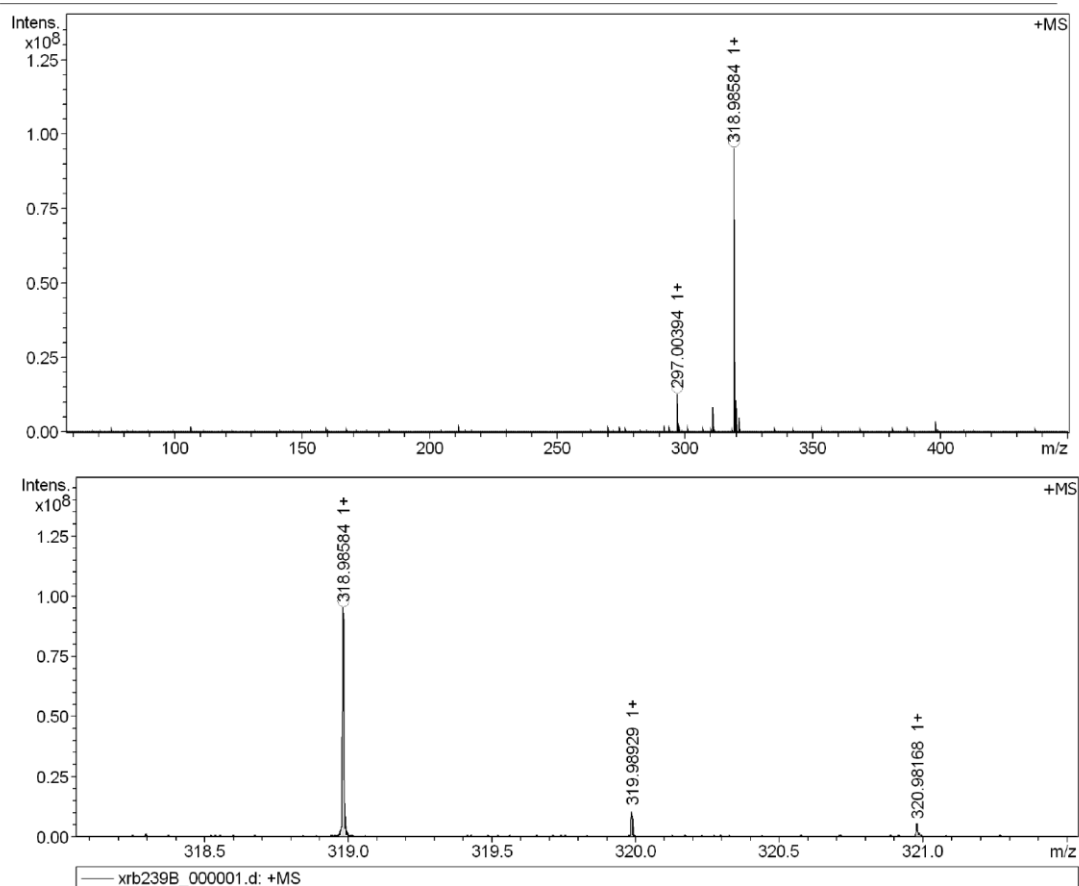

| Meas. m/z  | # | Ion Formula | Score  | m/z        | err [ppm] | Mean err [ppm] | mSigma | rdb | e <sup>-</sup> Conf | N-Rule |
|------------|---|-------------|--------|------------|-----------|----------------|--------|-----|---------------------|--------|
| 297.003943 | 1 | C10H10NaO7S | 100.00 | 297.003944 | 0.0       | 0.3            | 9.7    | 5.5 | even                | ok     |
| 318.985845 | 1 | C10H9Na2O7S | 100.00 | 318.985889 | -0.1      | 0.5            | 5.2    | 5.5 | even                | ok     |

**Figure S35.** ESI-MS of **8**.

XR017 #39-40 RT: 0.44-0.45 AV: 2 NL: 1.92E5  
T: FTMS {1,1} + p ESI Full ms [100.00-1000.00]

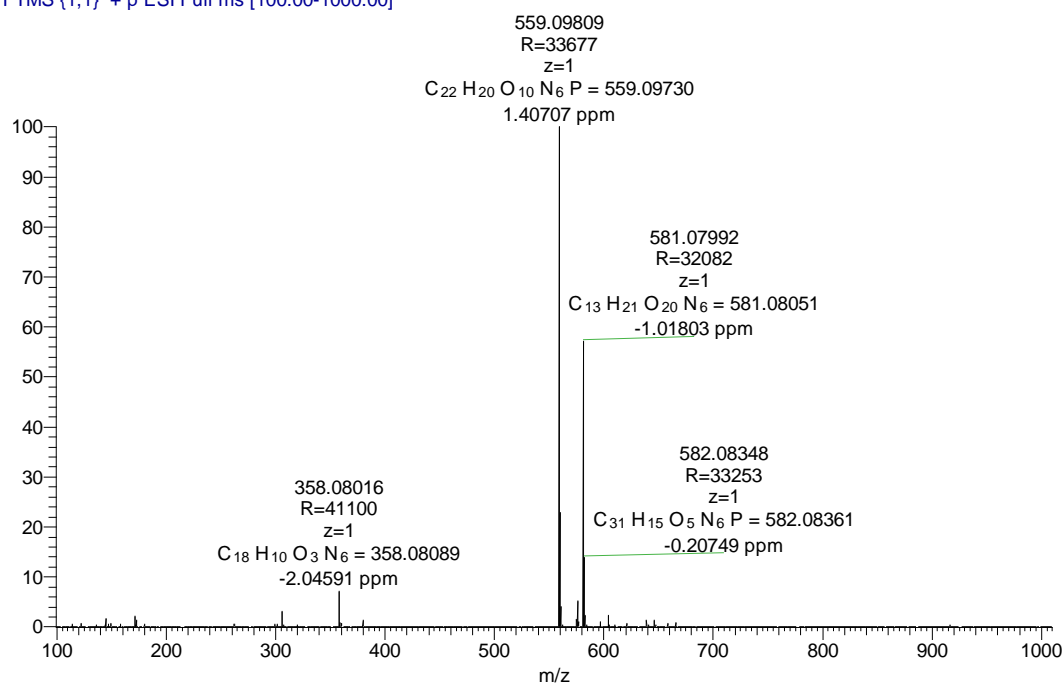

Figure S36. ESI-MS of 10.

XR043B\_150402111505 #33 RT: 0.28 AV: 1 NL: 5.87E6  
T: FTMS {1,1} - p ESI Full ms [100.00-1000.00]

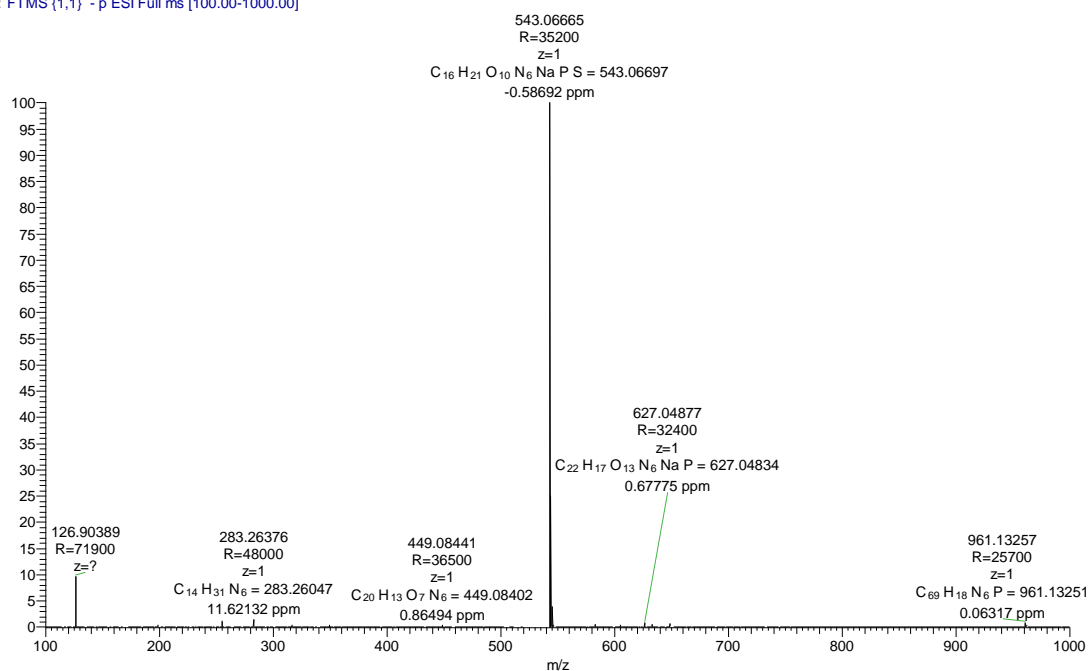

Figure S37. ESI-MS of 11.

## 9. X-ray crystallography study of **5a-c**

Single crystal X-ray diffraction data were collected on a MM007HF Saturn724+ diffractometer for structures **5a**, **5b** and **5c** using MoK/ $\alpha$  radiation ( $\lambda = 0.71073 \text{ \AA}$ ) at a temperature of 173 K. The intensity data were collected by the omega scans techniques, scaled, and reduced with CrystalClear (Rigaku Inc., 2007). Frame counting times of 10 seconds (**5a**), 5 seconds (**5b**) , 20 seconds (**5c**) were used for intensities data collection. X-rays were provided by a fine-focus sealed X-ray tube operated at 50 kV and 24 mA. Lattice constants were determined with the CrystalClear (Rigaku Inc., 2007) using peak centers for 8389 reflections (**5a**), 6849 reflections (**5b**), 6929 reflections (**5c**).

Integrated reflection intensities were produced and the correction of the collected intensities for absorption was done using the CrystalClear (Rigaku Inc., 2007) program. The structures were solved by direct methods using SHELXT (Sheldrick, 2014) and refined using full-matrix least-squares methods in ShelXL (Sheldrick, 2014/2015). All non-hydrogen atoms were refined anisotropically, and hydrogen atoms attached to carbon atoms were fixed at their ideal positions.

**Table S9.** Crystal data and structure refinement of **5a-c**

|                                   | <b>5a</b>                                                         | <b>5b</b>                                                         | <b>5c</b>                                                         |
|-----------------------------------|-------------------------------------------------------------------|-------------------------------------------------------------------|-------------------------------------------------------------------|
| Empirical formula                 | C <sub>33</sub> H <sub>37</sub> N <sub>11</sub> O <sub>8</sub>    | C <sub>28</sub> H <sub>33</sub> N <sub>7</sub> O <sub>9</sub> S   | C <sub>28</sub> H <sub>33</sub> N <sub>7</sub> O <sub>10</sub> S  |
| Formula weight                    | 715.73                                                            | 643.67                                                            | 659.67                                                            |
| Temperature                       | 173.15 K                                                          | 173(2) K                                                          | 173.15 K                                                          |
| Wavelength                        | 0.71073 Å                                                         | 0.71073 Å                                                         | 0.71073 Å                                                         |
| Crystal system                    | Orthorhombic                                                      | Orthorhombic                                                      | Monoclinic                                                        |
| Space group                       | Pbca                                                              | Pbca                                                              | P1 21/n1                                                          |
| <i>a</i>                          | 13.944(3) Å                                                       | 16.9672(19) Å                                                     | 11.585(2) Å                                                       |
| <i>b</i>                          | 17.897(4) Å                                                       | 16.6921(19) Å                                                     | 18.121(3) Å                                                       |
| <i>c</i>                          | 29.542(6) Å                                                       | 21.140(3) Å                                                       | 14.653(3) Å                                                       |
| $\alpha$                          | 90 °                                                              | 90 °                                                              | 90 °                                                              |
| $\beta$                           | 90 °                                                              | 90 °                                                              | 90.339(3) °                                                       |
| $\gamma$                          | 90 °                                                              | 90 °                                                              | 90 °                                                              |
| Volume                            | 7372(3) Å <sup>3</sup>                                            | 5987.3(12) Å <sup>3</sup>                                         | 3035.2(10) Å <sup>3</sup>                                         |
| Z                                 | 8                                                                 | 8                                                                 | 4                                                                 |
| Density (calculated)              | 1.290 Mg/m <sup>3</sup>                                           | 1.428 Mg/m <sup>3</sup>                                           | 1.444 Mg/m <sup>3</sup>                                           |
| Absorption coefficient            | 0.095 mm <sup>-1</sup>                                            | 0.174 mm <sup>-1</sup>                                            | 0.176 mm <sup>-1</sup>                                            |
| F(000)                            | 3008                                                              | 2704                                                              | 1384                                                              |
| Crystal size                      | 0.33 x 0.209 x 0.067 mm <sup>3</sup>                              | 0.349 x 0.17x 0.05 mm <sup>3</sup>                                | 0.201x 0.18 x 0.039 mm <sup>3</sup>                               |
| Theta range for data collection   | 1.976 to 27.424 °                                                 | 1.964 to 27.489 °                                                 | 1.802 to 27.578 °                                                 |
| Index ranges                      | -18<= <i>h</i> <=16<br>-23<= <i>k</i> <=15<br>-38<= <i>l</i> <=38 | -22<= <i>h</i> <=22<br>-21<= <i>k</i> <=21<br>-27<= <i>l</i> <=27 | -15<= <i>h</i> <=14<br>-23<= <i>k</i> <=23<br>-19<= <i>l</i> <=19 |
| Reflections collected             | 65235                                                             | 80056                                                             | 6929                                                              |
| Independent reflections           | 8389 [R(int) = 0.0602]                                            | 6849 [R(int) = 0.0511]                                            | 6929 [R(int) = ?]                                                 |
| Completeness to theta = 25.197 °  | 99.9%                                                             | 99.9 %                                                            | 99.7 %                                                            |
| Absorption correction             | Semi-empirical from equivalents                                   | Semi-empirical from equivalents                                   | Semi-empirical from equivalents                                   |
| Max. and min. transmission        | 1.00000 and 0.7260                                                | 1.00000 and 0.89169                                               | 1.0000 and 0.8400                                                 |
| Refinement method                 | Full-matrix least-squares on F <sup>2</sup>                       | Full-matrix least-squares on F <sup>2</sup>                       | Full-matrix least-squares on F <sup>2</sup>                       |
| Data / restraints / parameters    | 8389 / 0 / 479                                                    | 6849 / 0 / 412                                                    | 6929 / 0 / 422                                                    |
| Goodness-of-fit on F <sup>2</sup> | 1.324                                                             | 1.285                                                             | 1.093                                                             |
| Final R indices [I>2sigma(I)]     | R1 = 0.0843, wR2 = 0.1770                                         | R1 = 0.0640, wR2 = 0.1531                                         | R1 = 0.0678, wR2 = 0.1943                                         |
| R indices (all data)              | R1 = 0.0869, wR2 = 0.1785                                         | R1 = 0.0643, wR2 = 0.1533                                         | R1 = 0.0712, wR2 = 0.1972                                         |
| Extinction coefficient            | n/a                                                               | n/a                                                               | n/a                                                               |
| Largest diff. peak and hole       | 0.260 and -0.318 e.Å <sup>-3</sup>                                | 0.608 and -0.386 e.Å <sup>-3</sup>                                | 0.456and -0.345e.Å <sup>-3</sup>                                  |

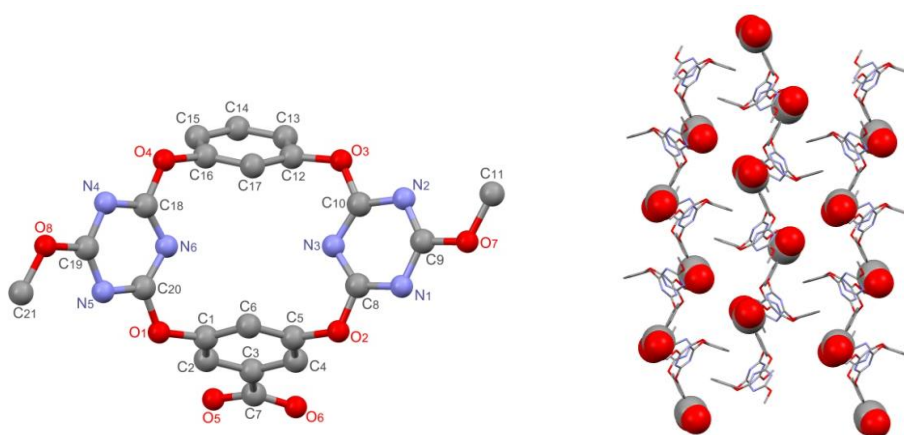

**Figure S38.** X-ray crystal structure of **5a** and the extended packing motif with the anionic heads highlighted in space filling. Counteranion  $^+\text{NMe}_4$  and solvent  $\text{CH}_3\text{CN}$  molecules are omitted for clarity.

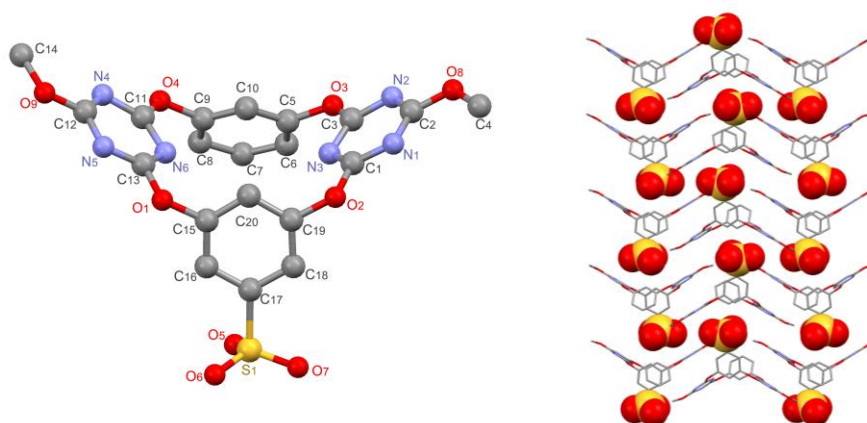

**Figure S39.** X-ray crystal structure of **5b** and the extended packing motif with the anionic heads highlighted in space filling. Counteranion  $^+\text{NEt}_4$  is omitted for clarity.

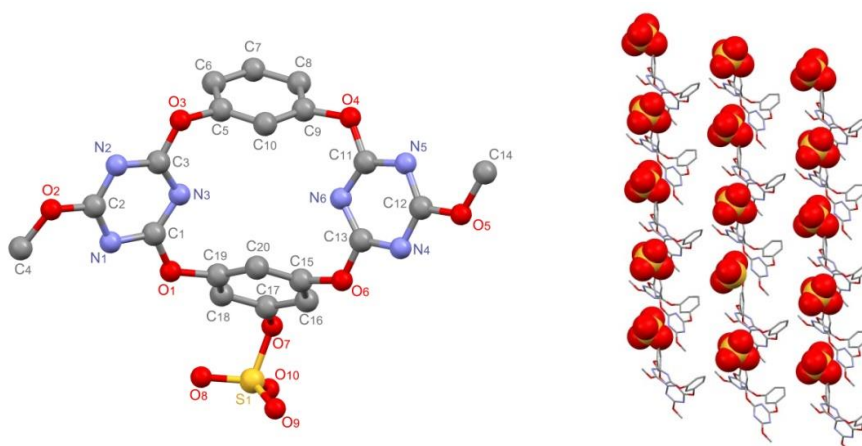

**Figure S40.** X-ray crystal structure of **5c** and the extended packing motif with the anionic heads highlighted in space filling. Counteranion  $^+\text{NEt}_4$  is omitted for clarity.



## 10. Copies of NMR spectra for new compounds

### 2b - $^1\text{H}$ NMR

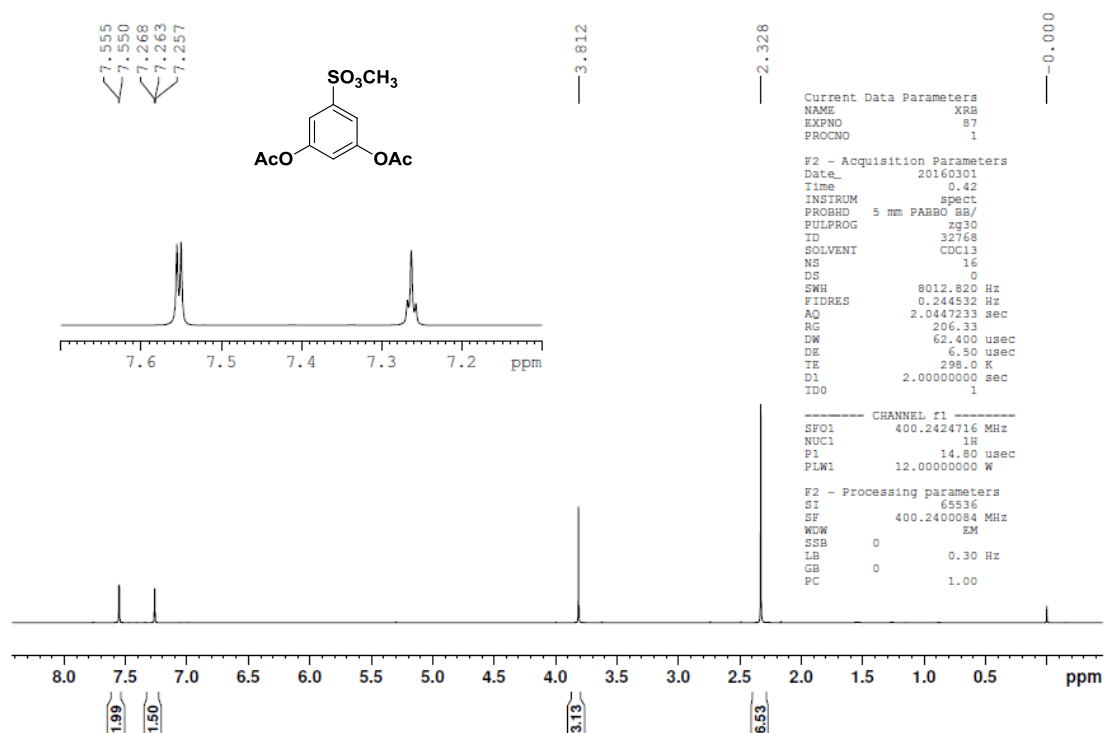

### 2b - $^{13}\text{C}$ NMR

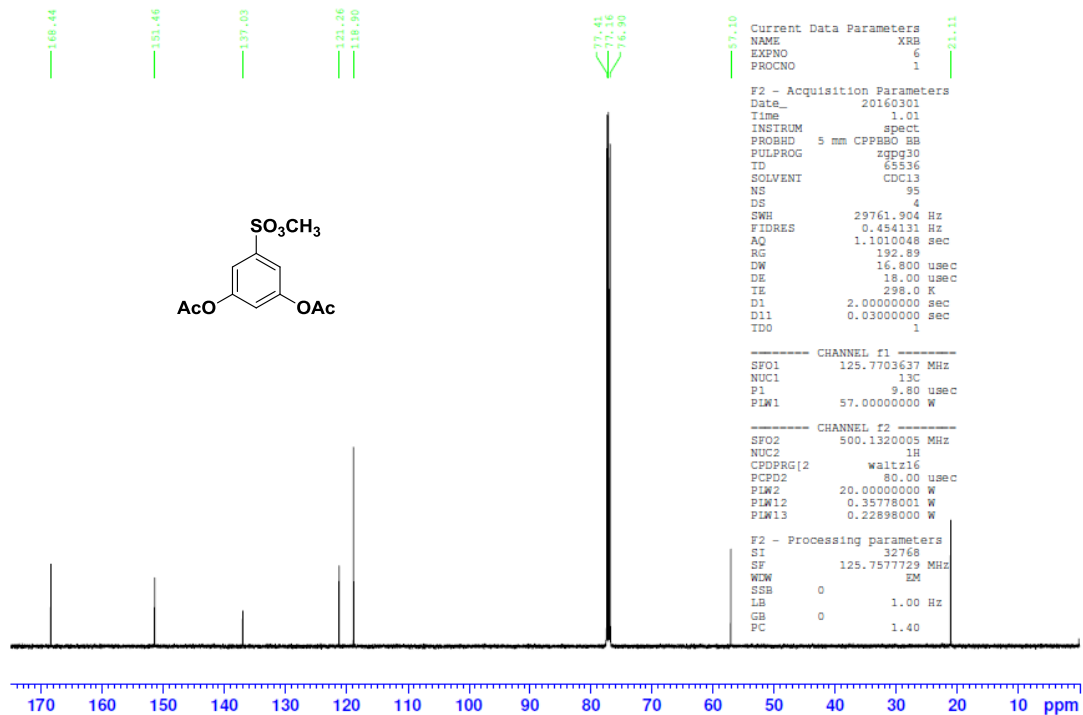

### 3a - <sup>1</sup>H NMR

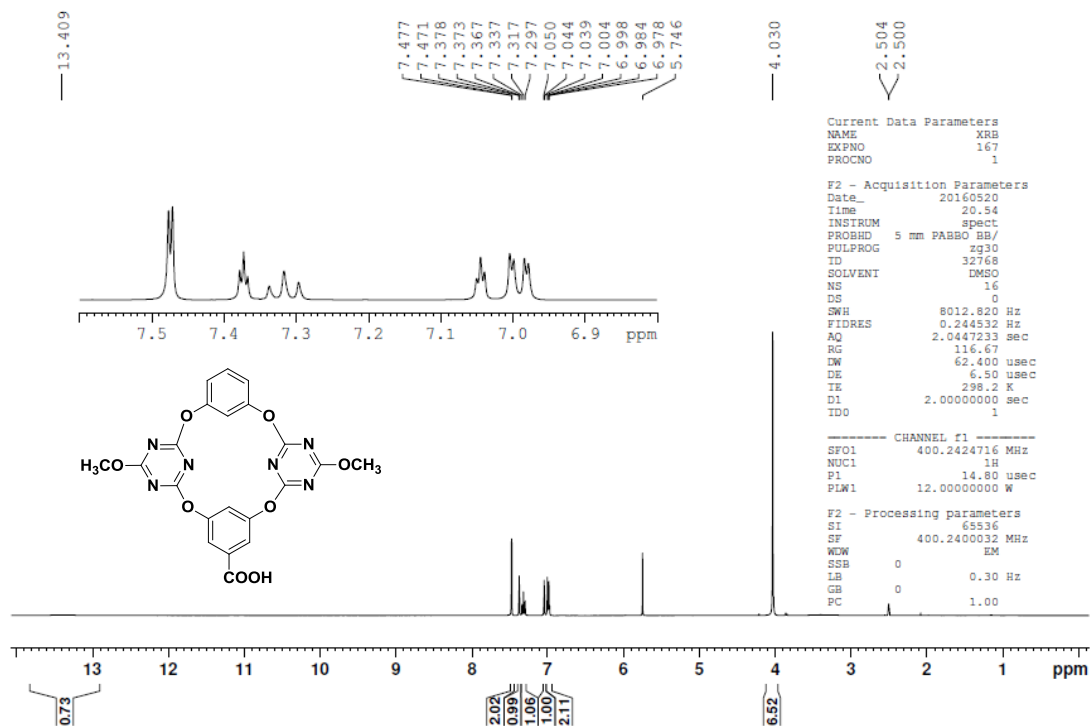

### 3a - <sup>13</sup>C NMR

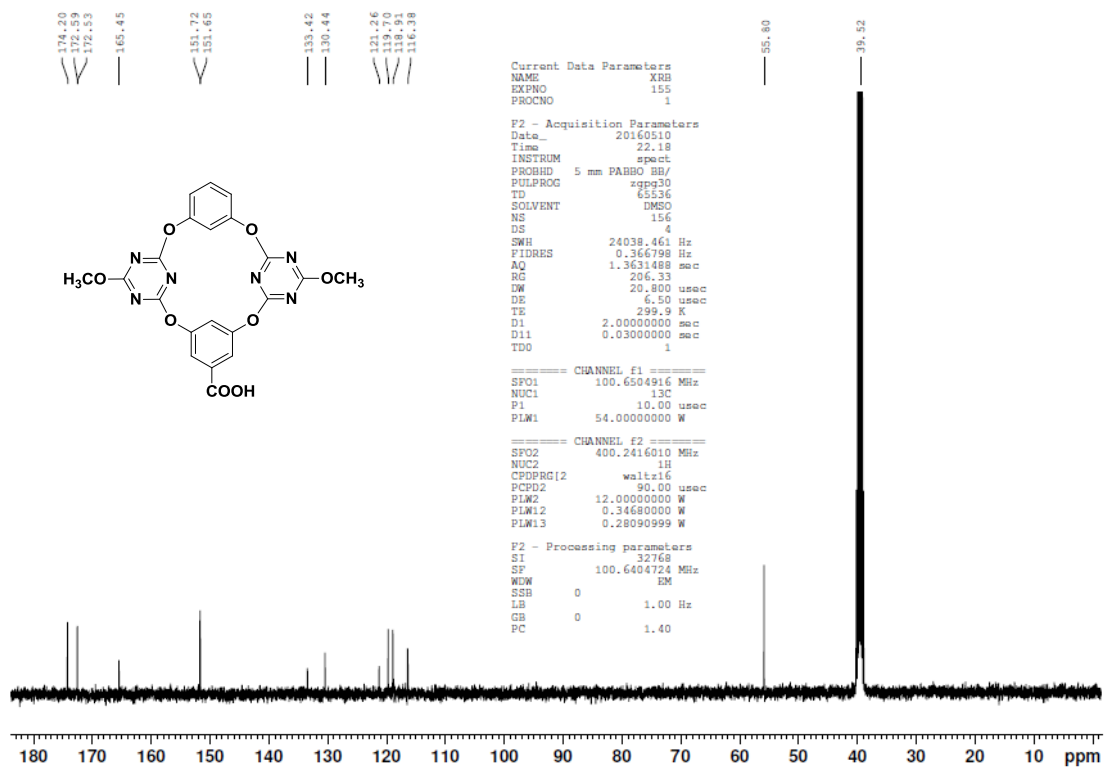

### 3b - <sup>1</sup>H NMR

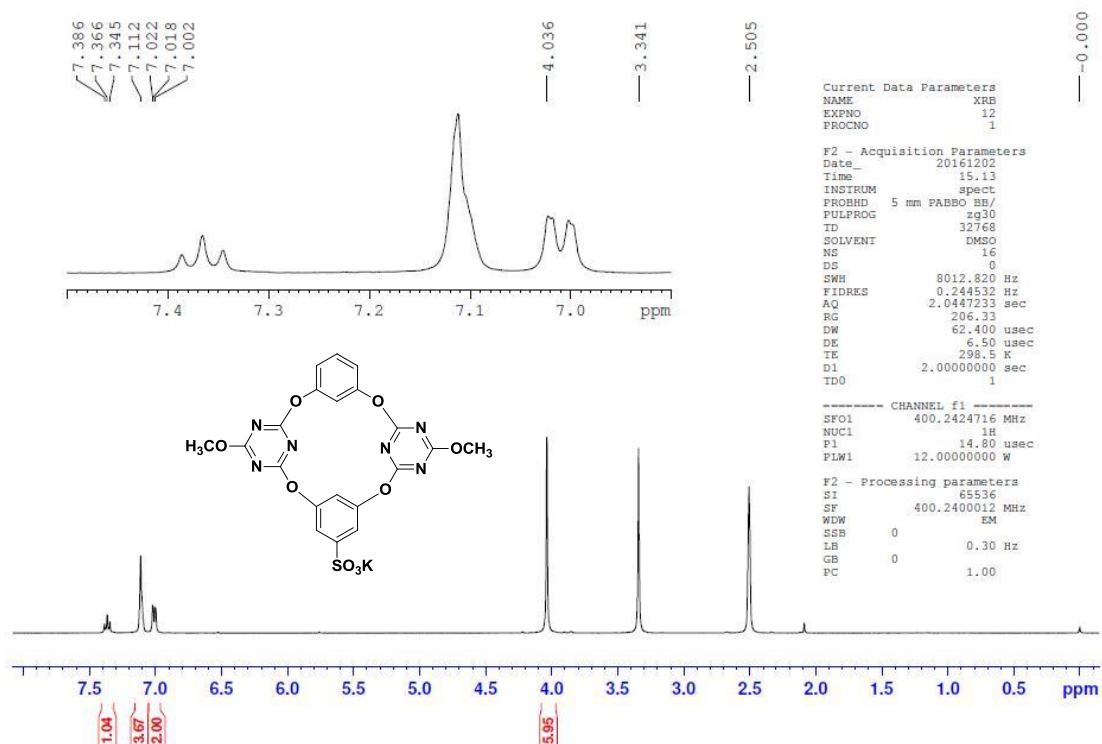

### 3b - <sup>13</sup>C NMR

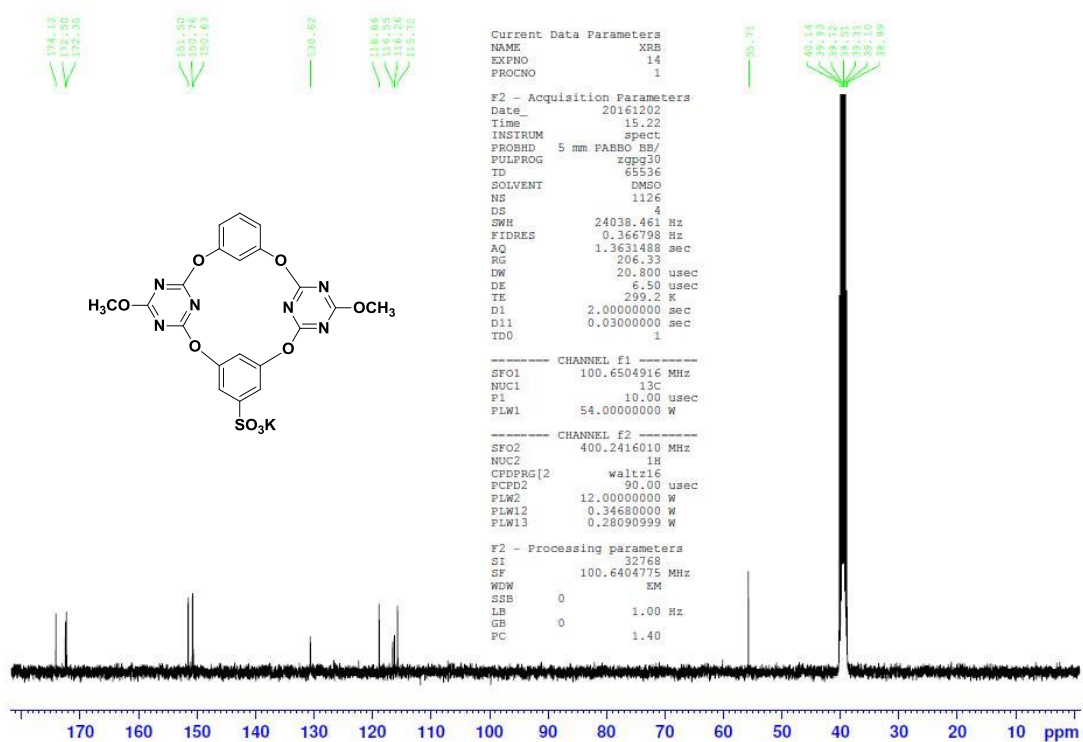

### 3c - <sup>1</sup>H NMR

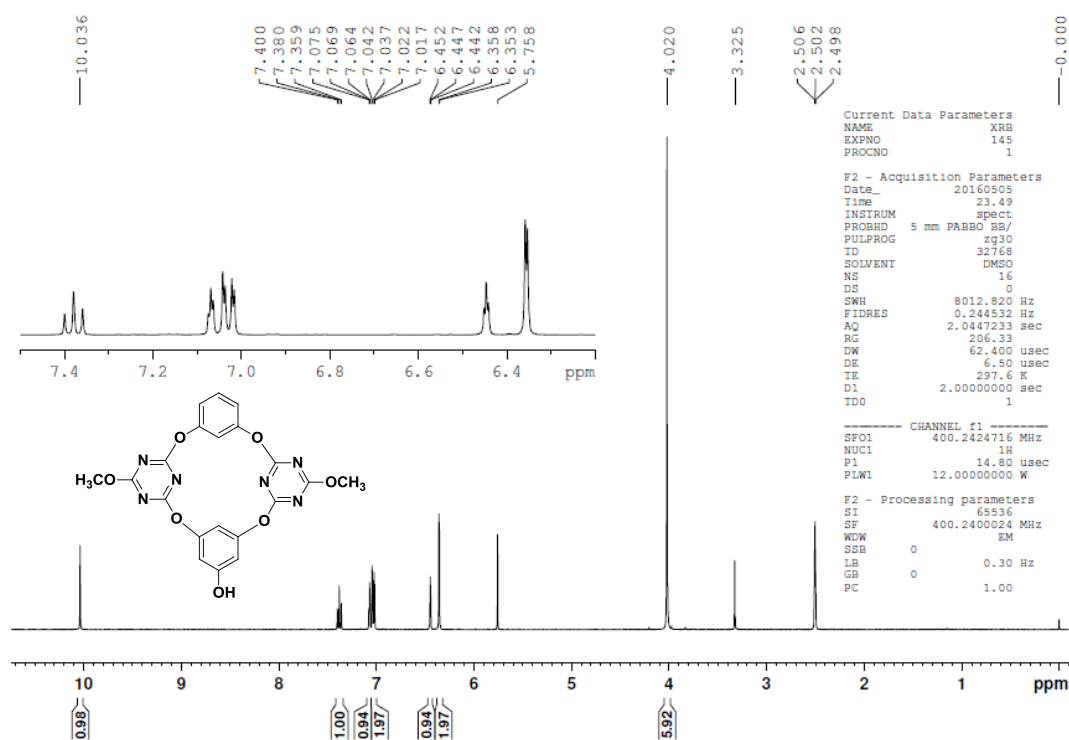

### 3c - <sup>13</sup>C NMR

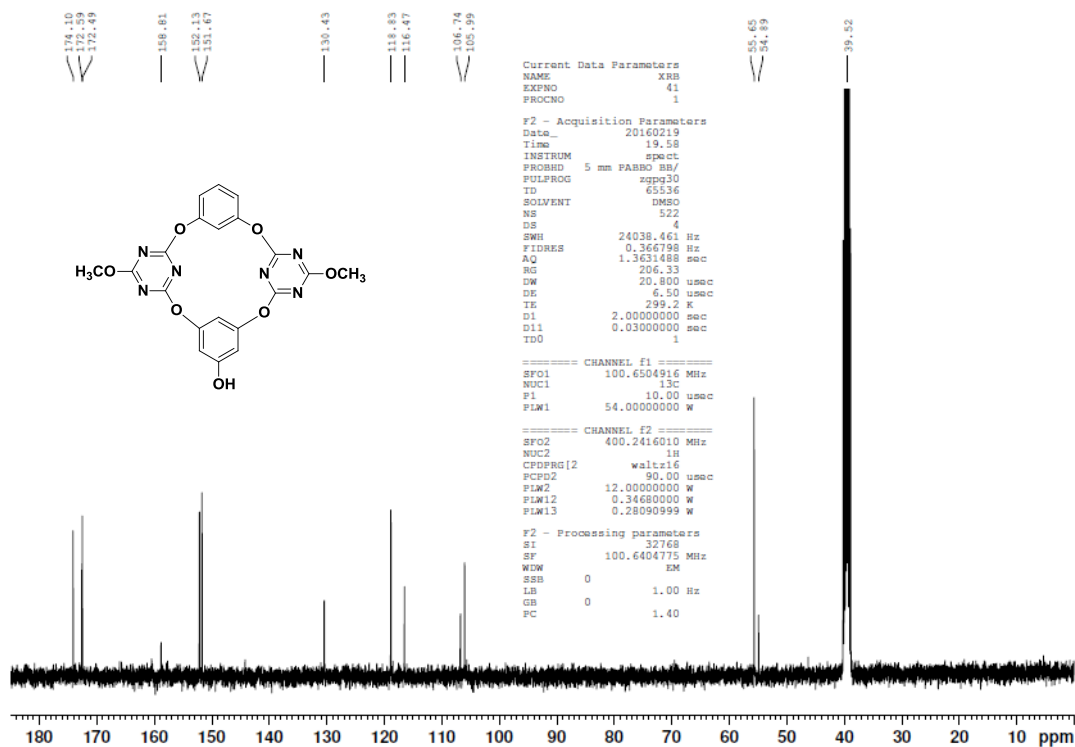

# 4a - <sup>1</sup>H NMR

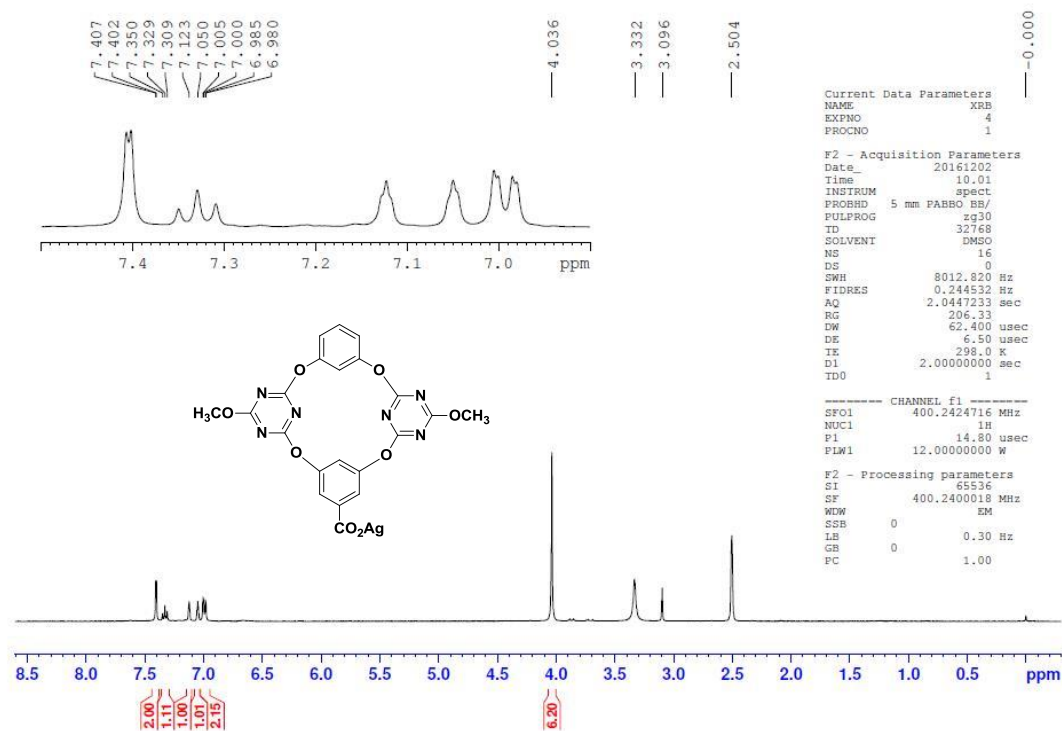

# 4a - <sup>13</sup>C NMR

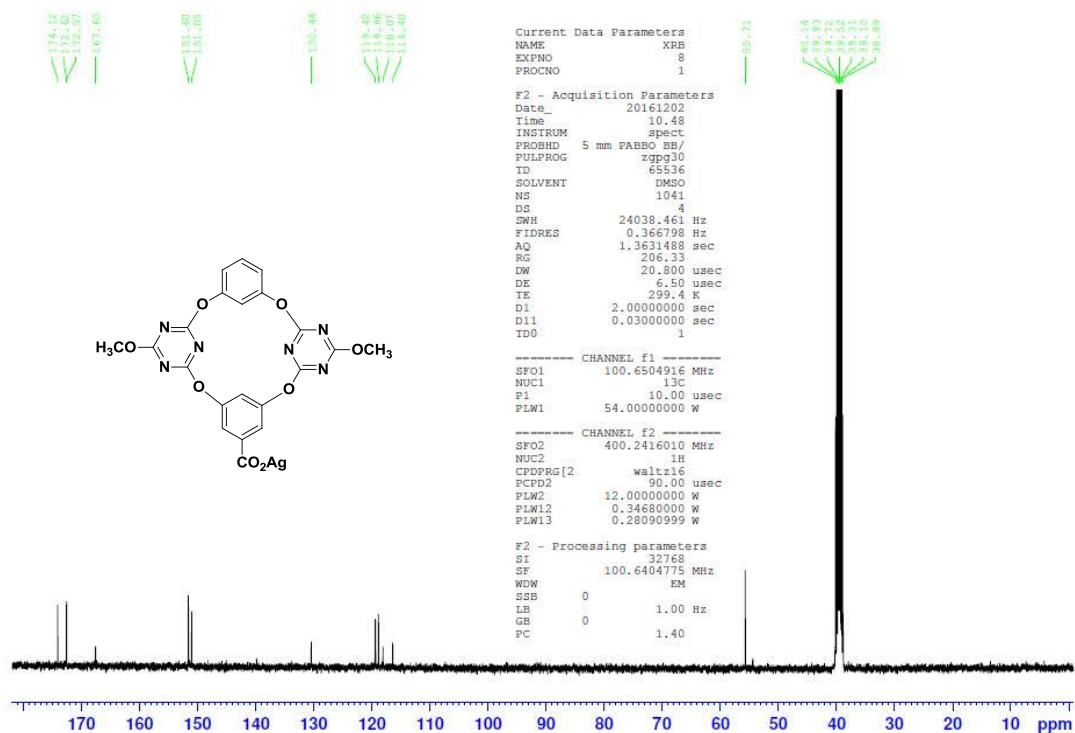

# 4b - <sup>1</sup>H NMR

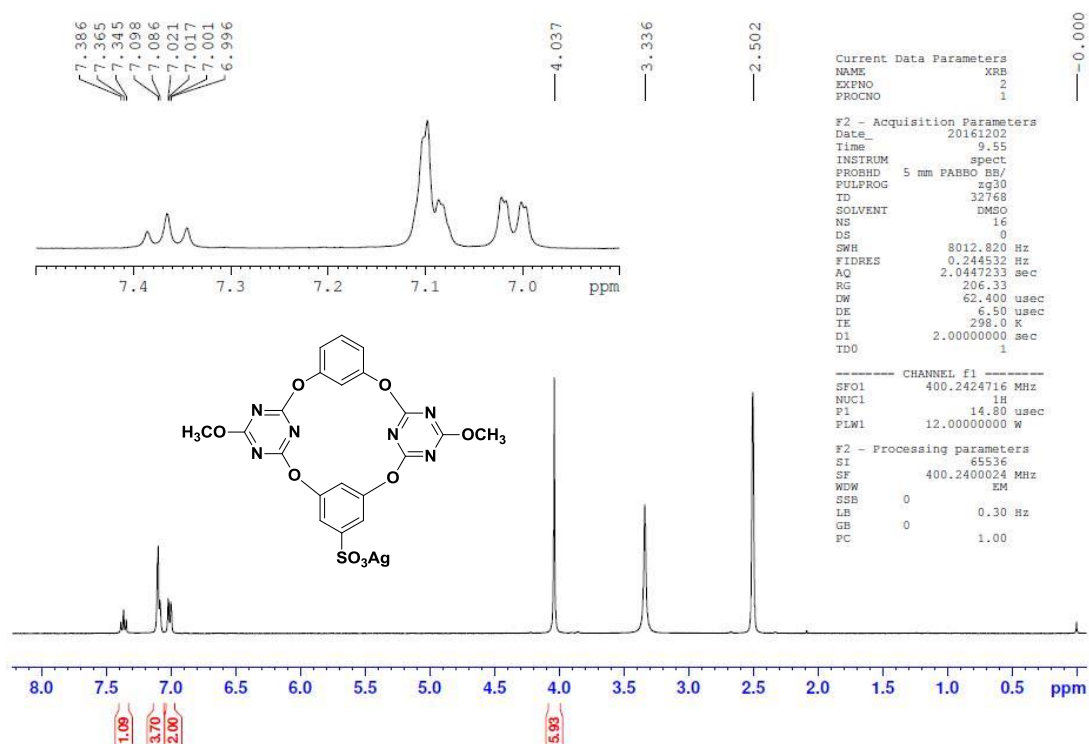

# 4b - <sup>13</sup>C NMR

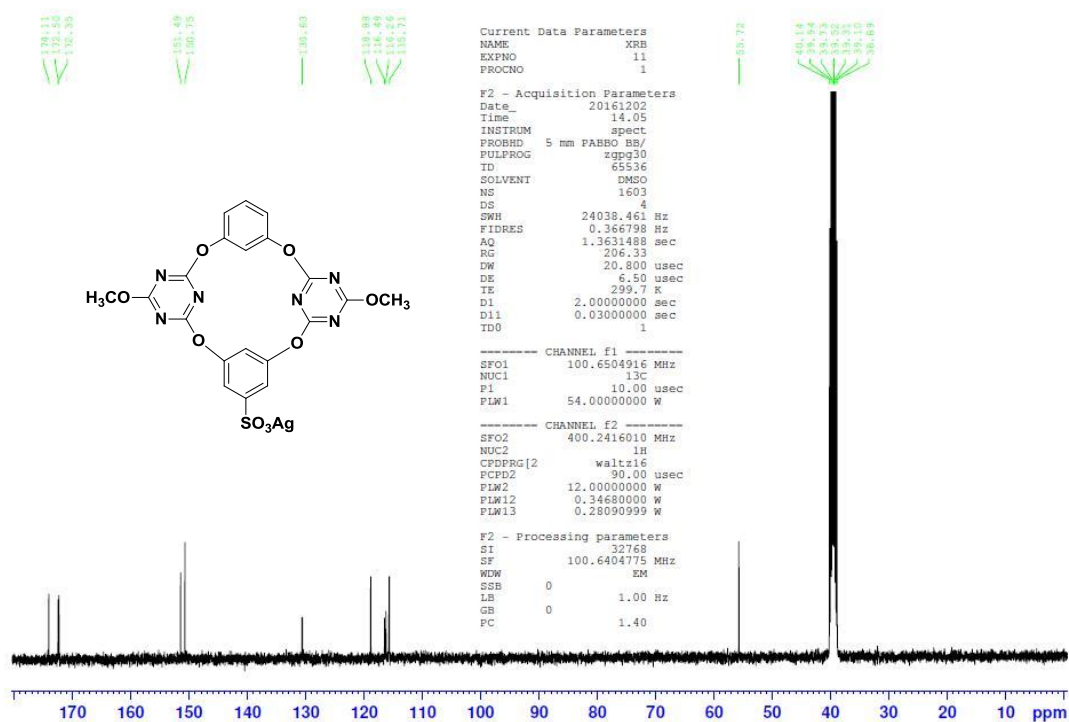

# 4c - <sup>1</sup>H NMR

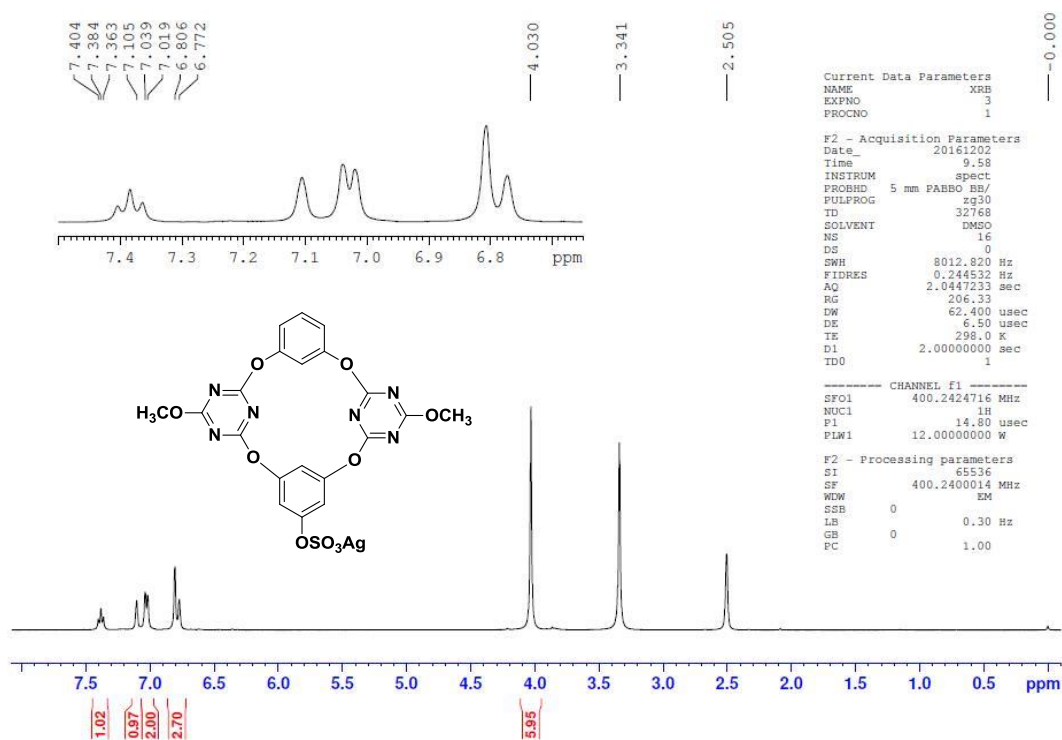

# 4c - <sup>13</sup>C NMR

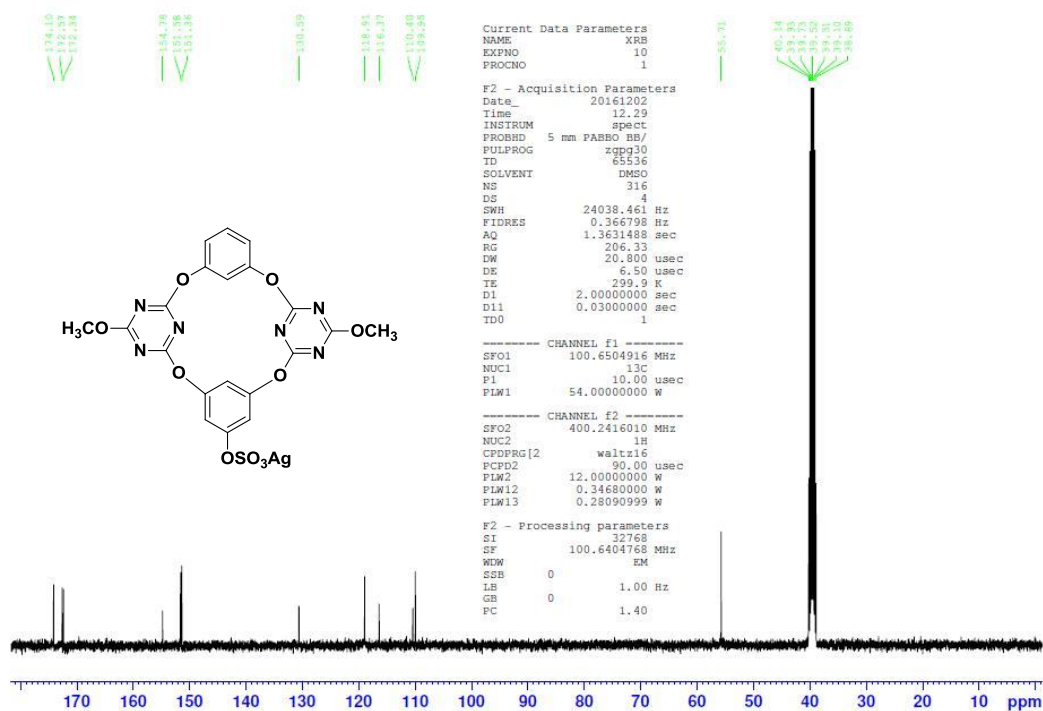



# 4d - <sup>1</sup>H NMR

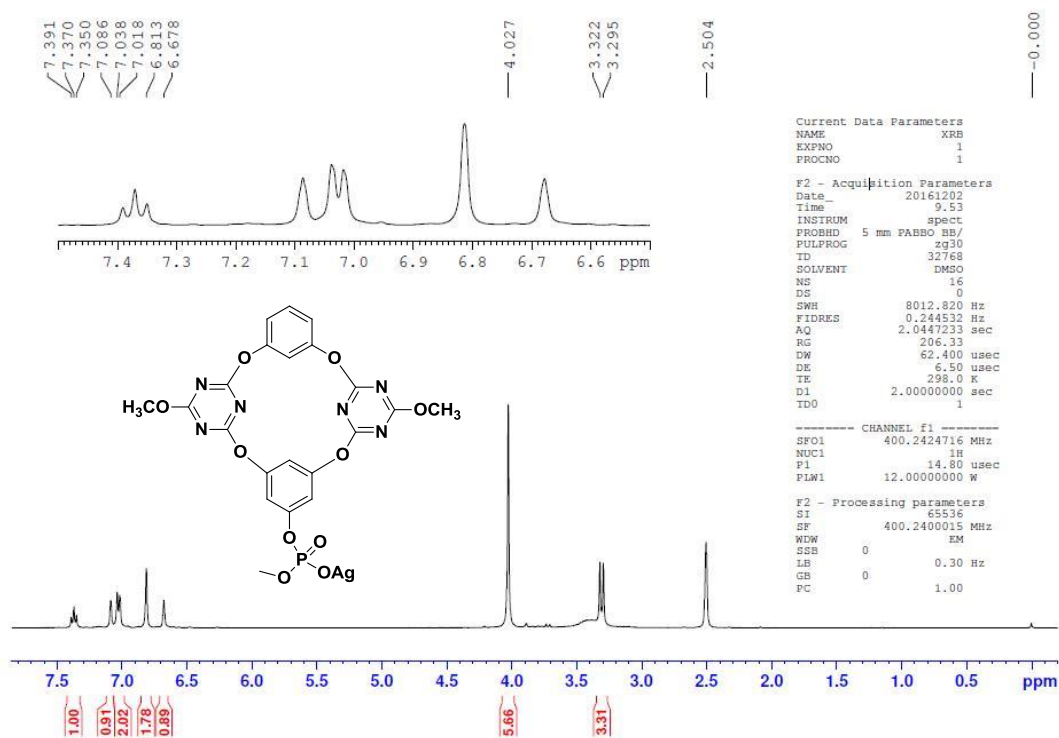

# 4d - <sup>13</sup>C NMR

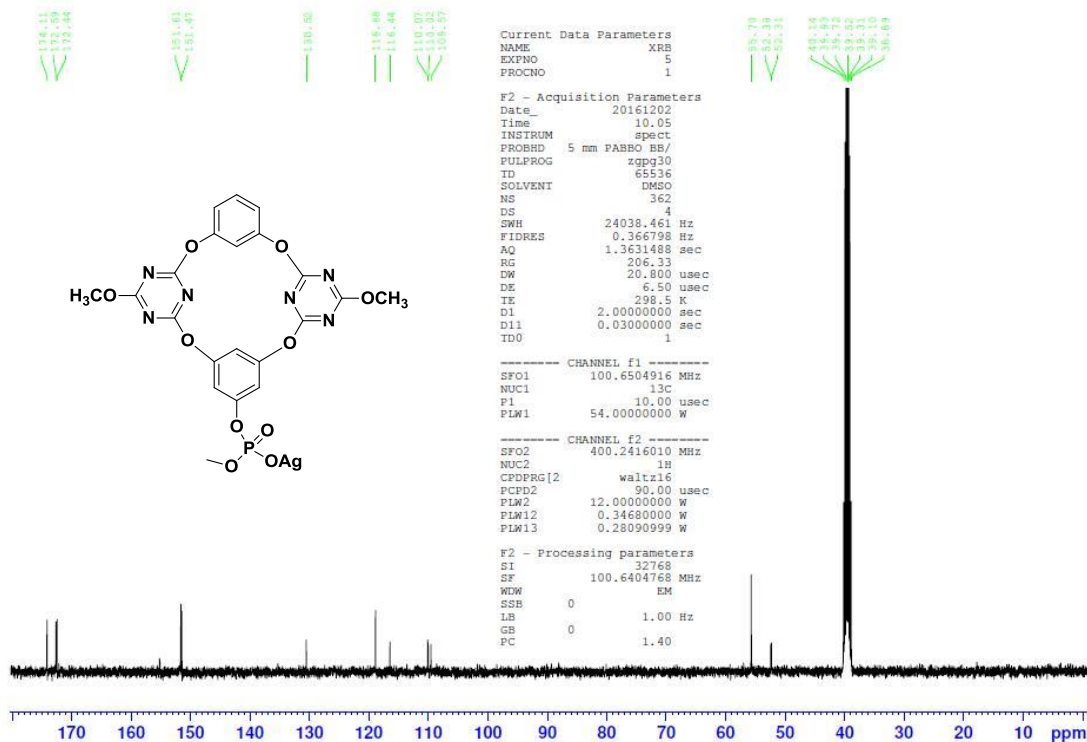



# 5a - <sup>1</sup>H NMR

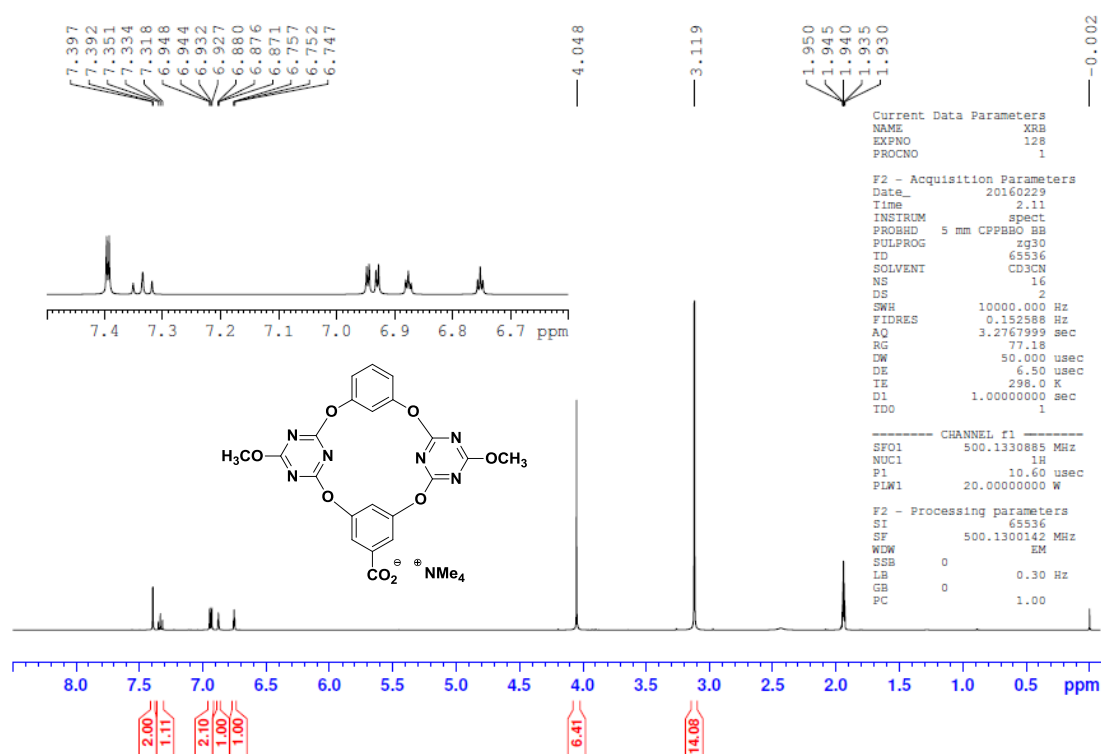

# 5a - <sup>13</sup>C NMR

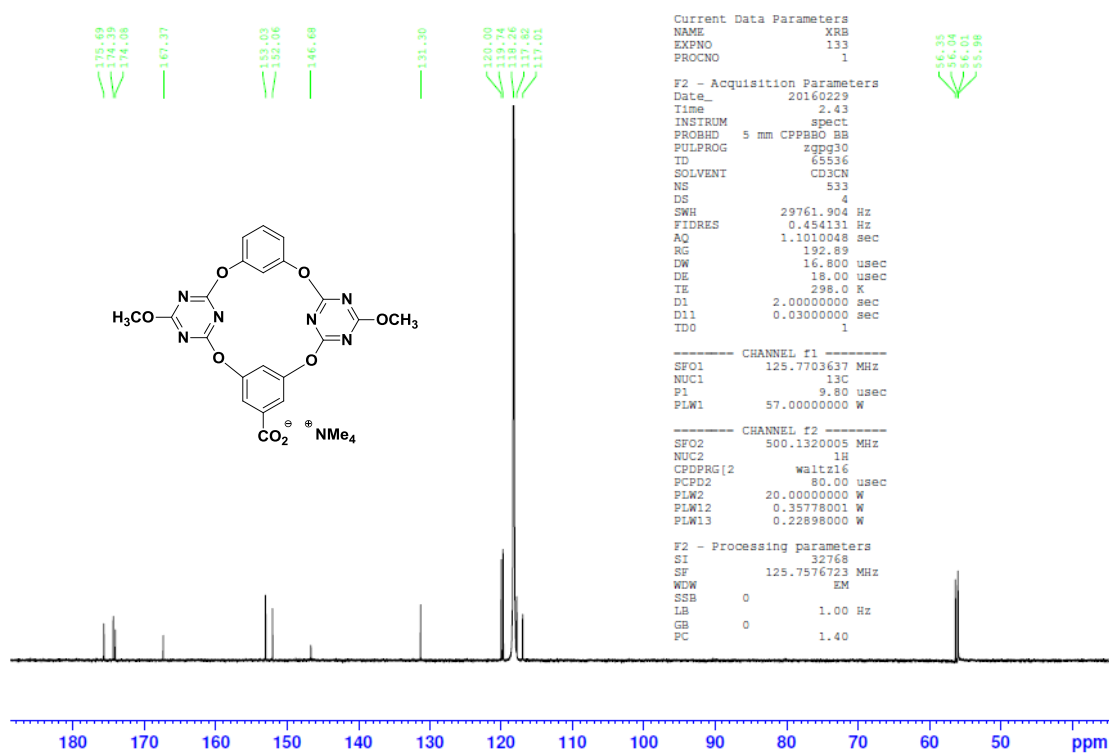

## 5b - <sup>1</sup>H NMR

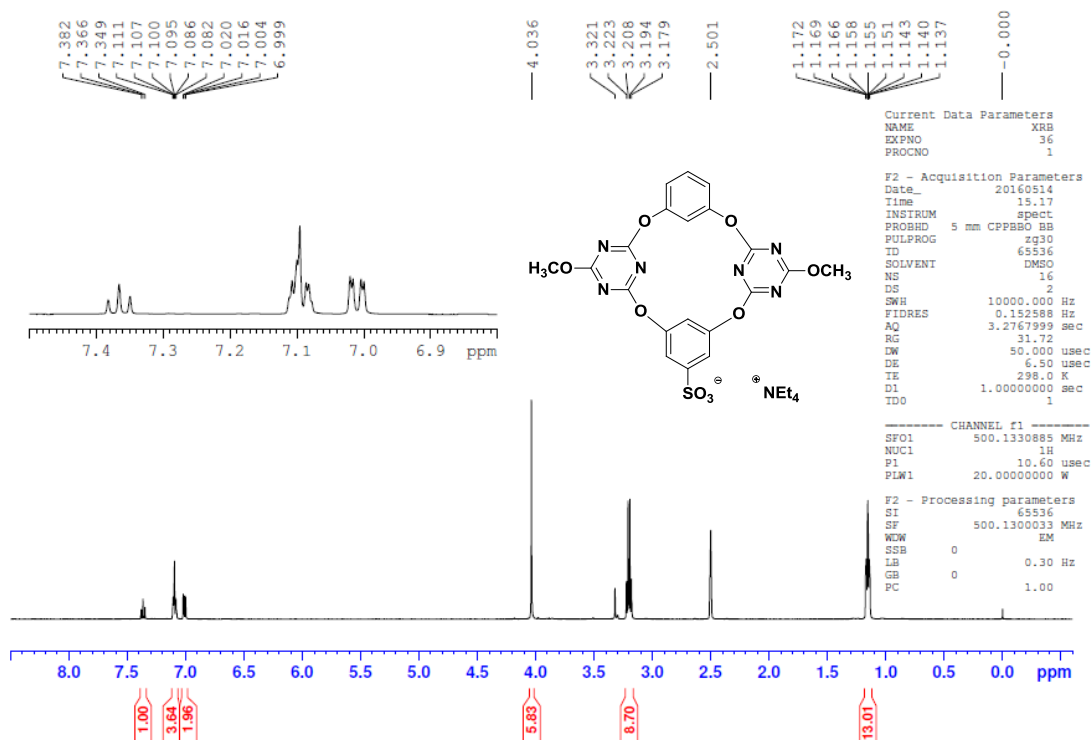

## 5b - <sup>13</sup>C NMR

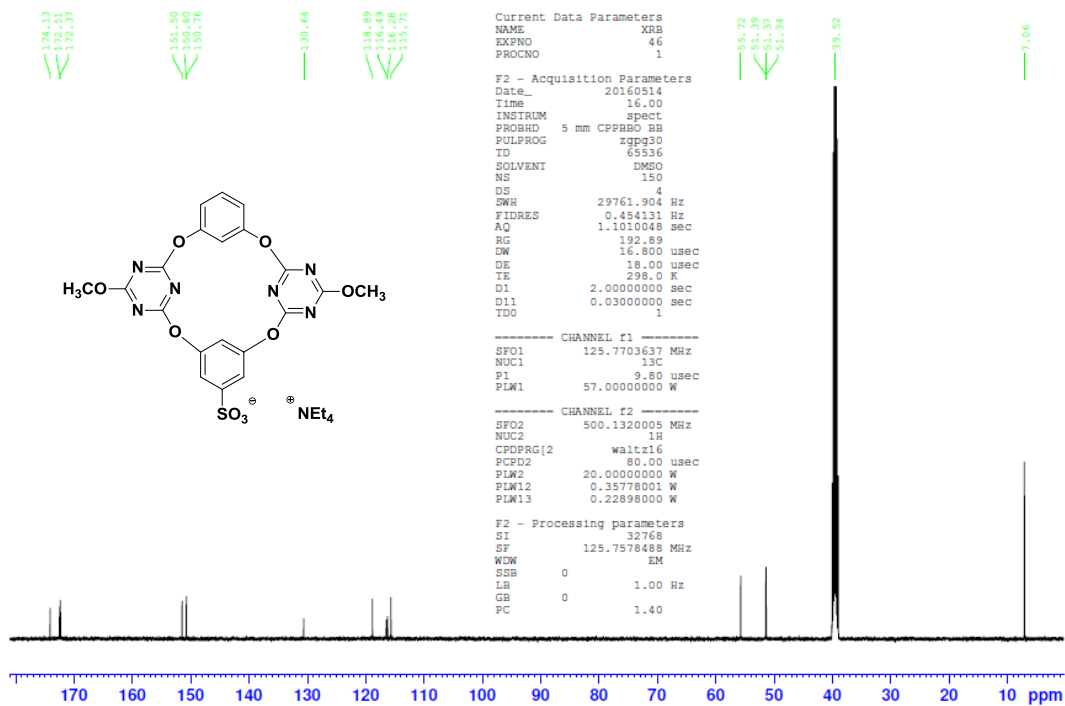

# 5c - <sup>1</sup>H NMR

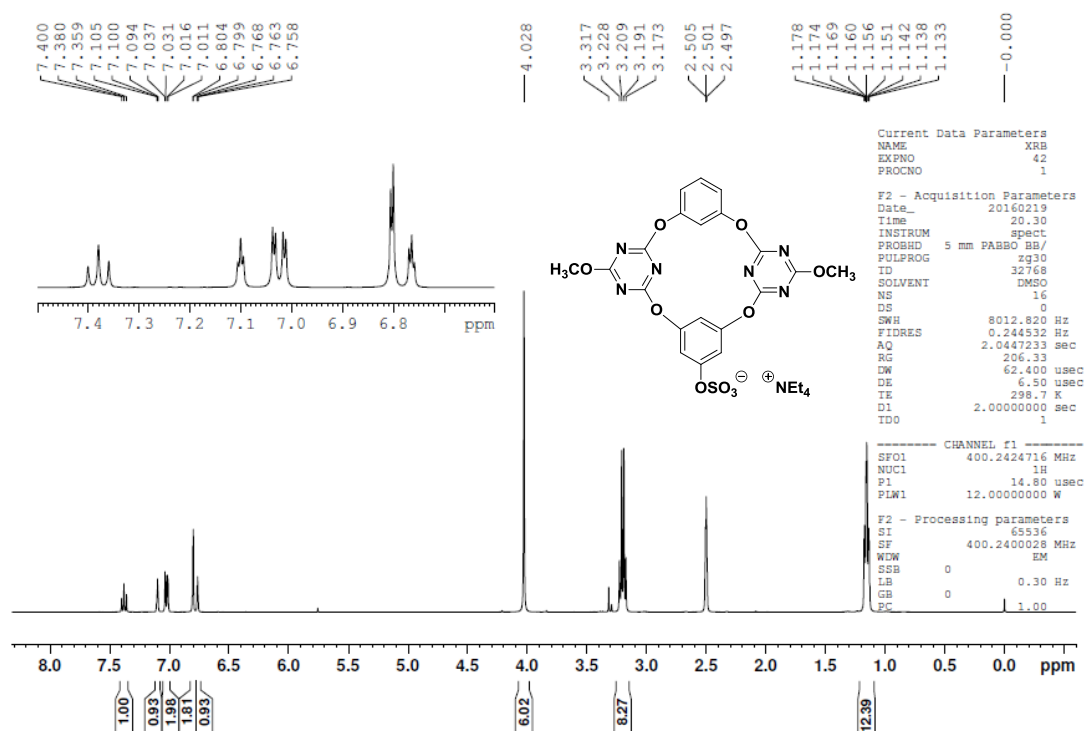

# 5c - <sup>13</sup>C NMR

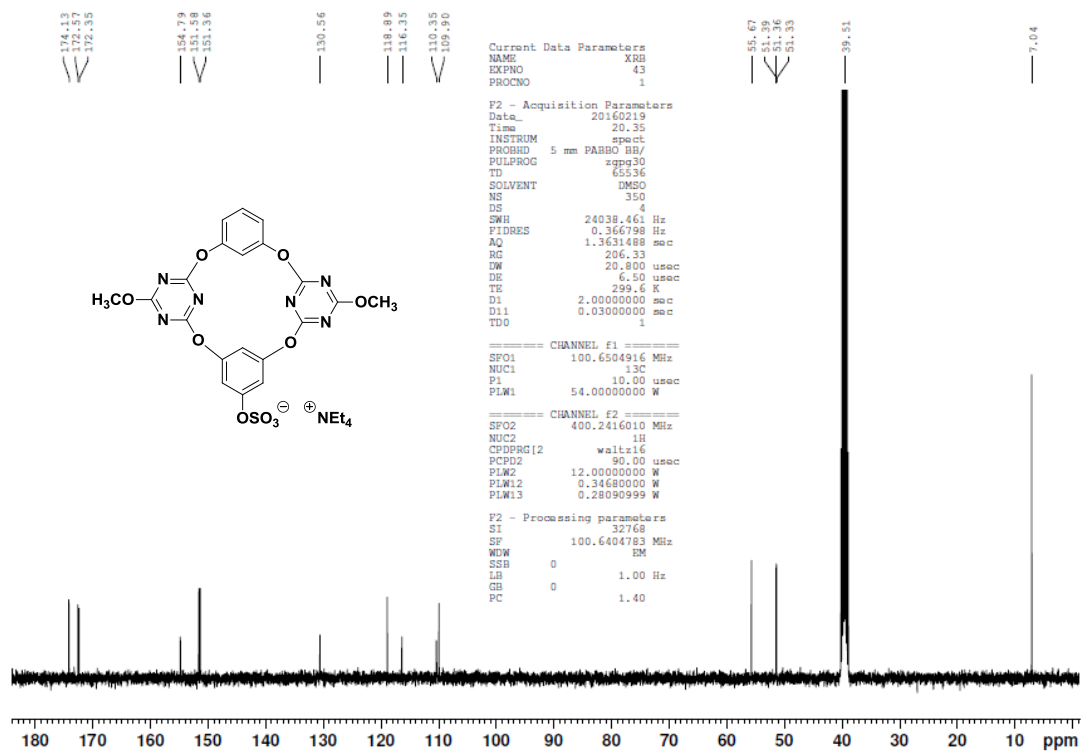

# 5d - <sup>1</sup>H NMR

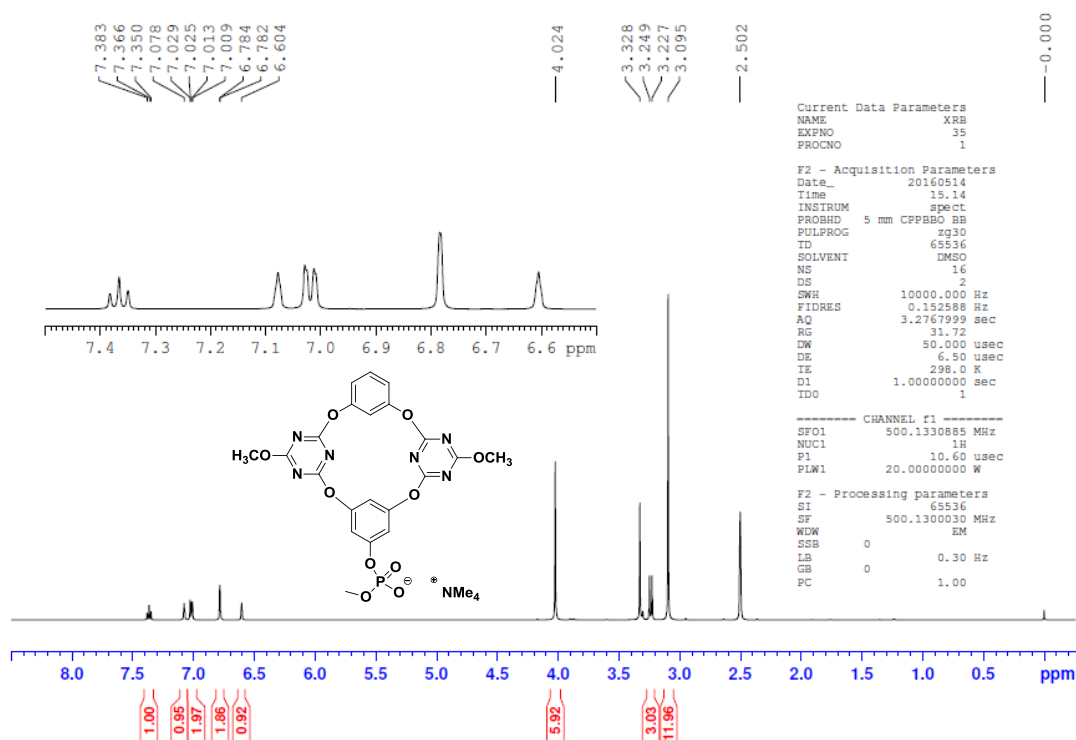

# 5d - <sup>13</sup>C NMR

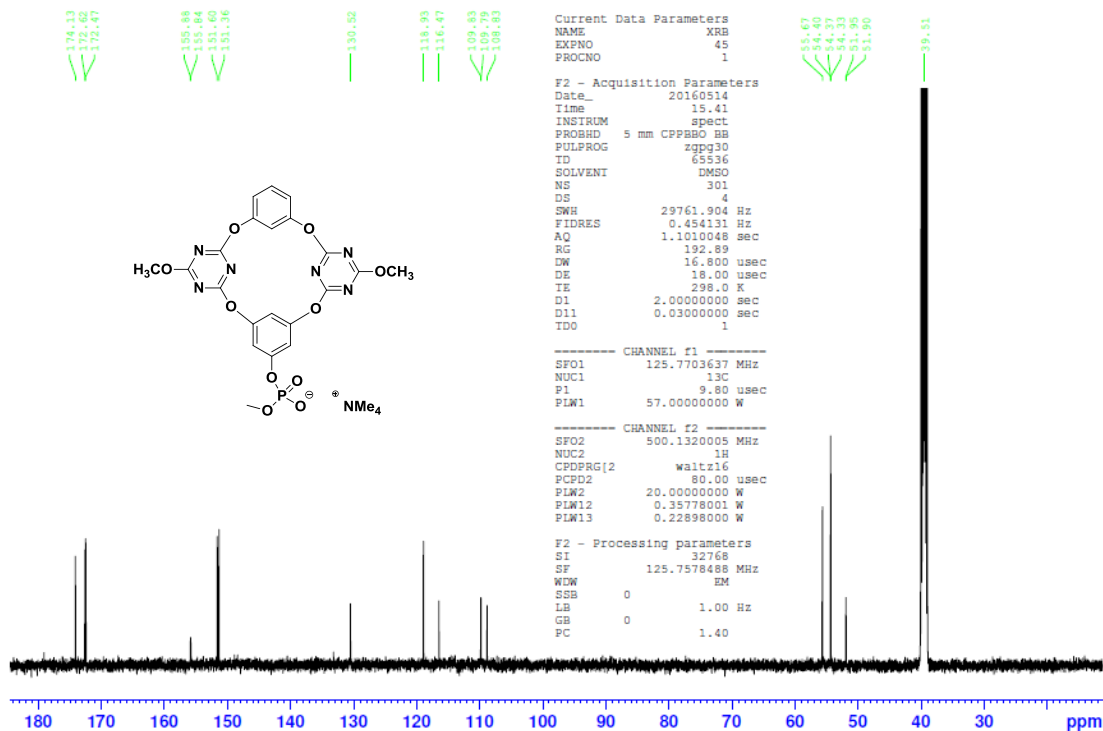

# 8 - <sup>1</sup>H NMR

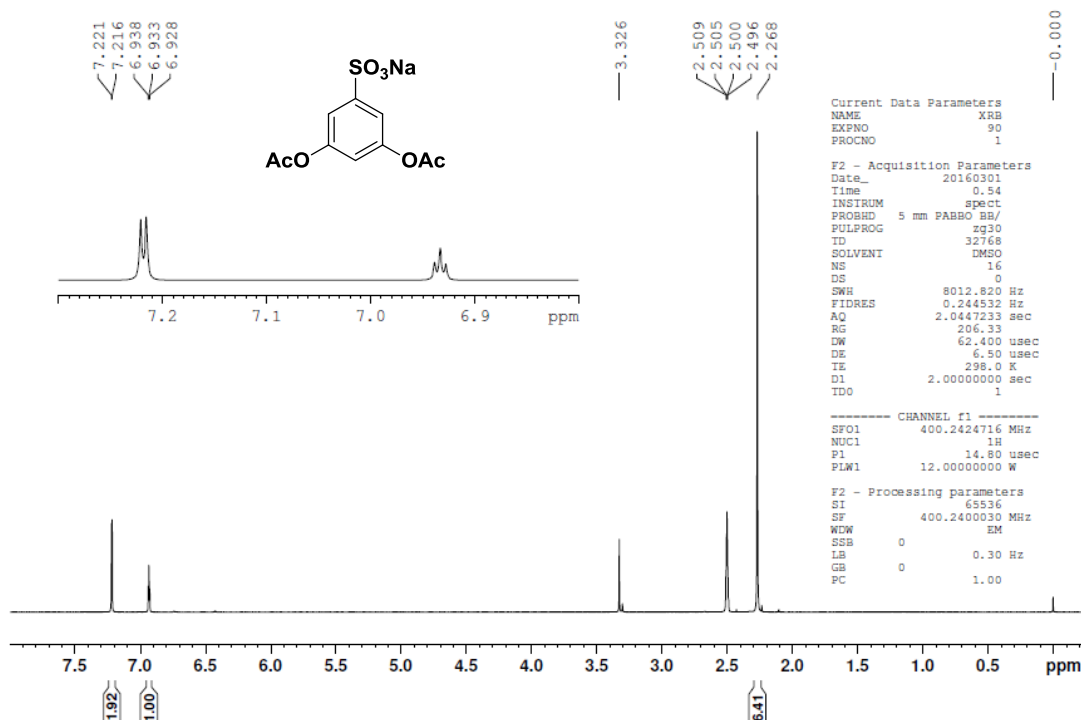

# 8 - <sup>13</sup>C NMR

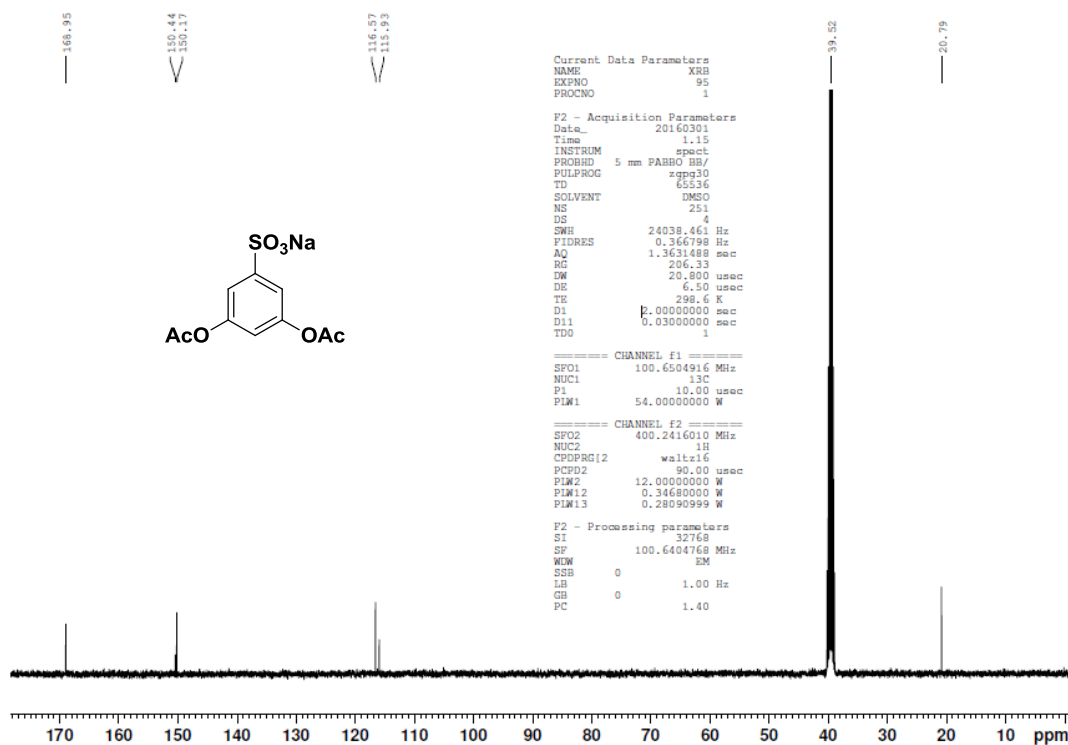

# 10 - <sup>1</sup>H NMR

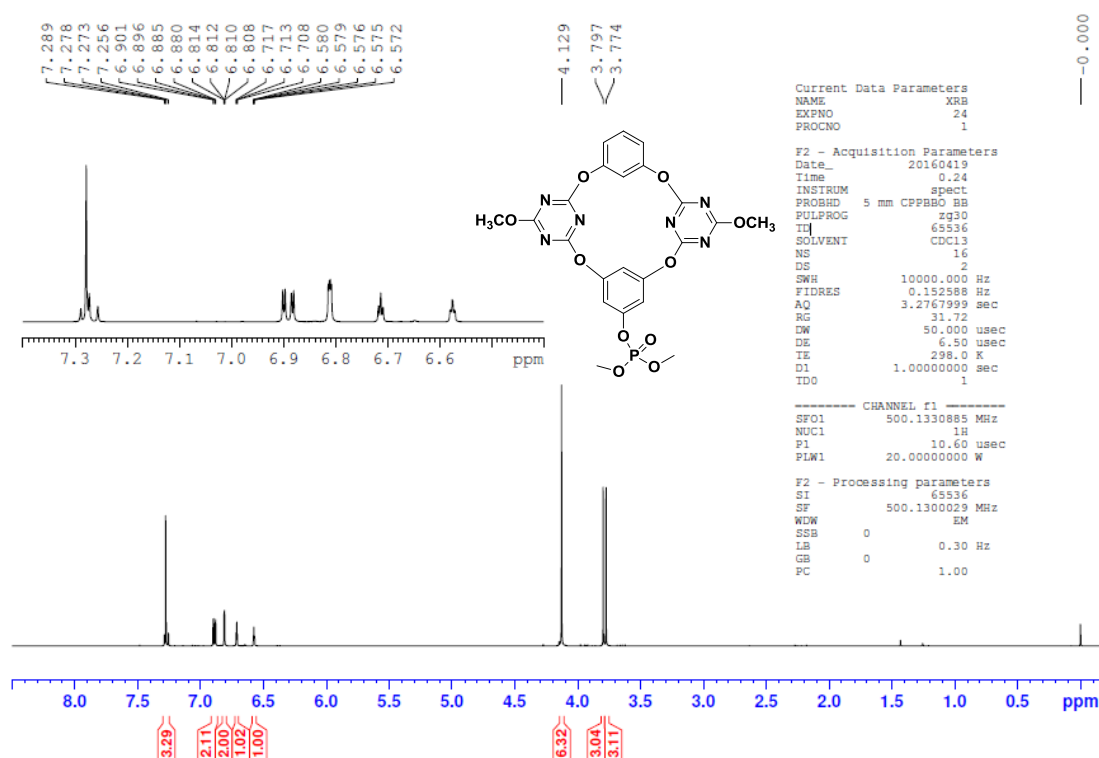

# 10 - <sup>13</sup>C NMR

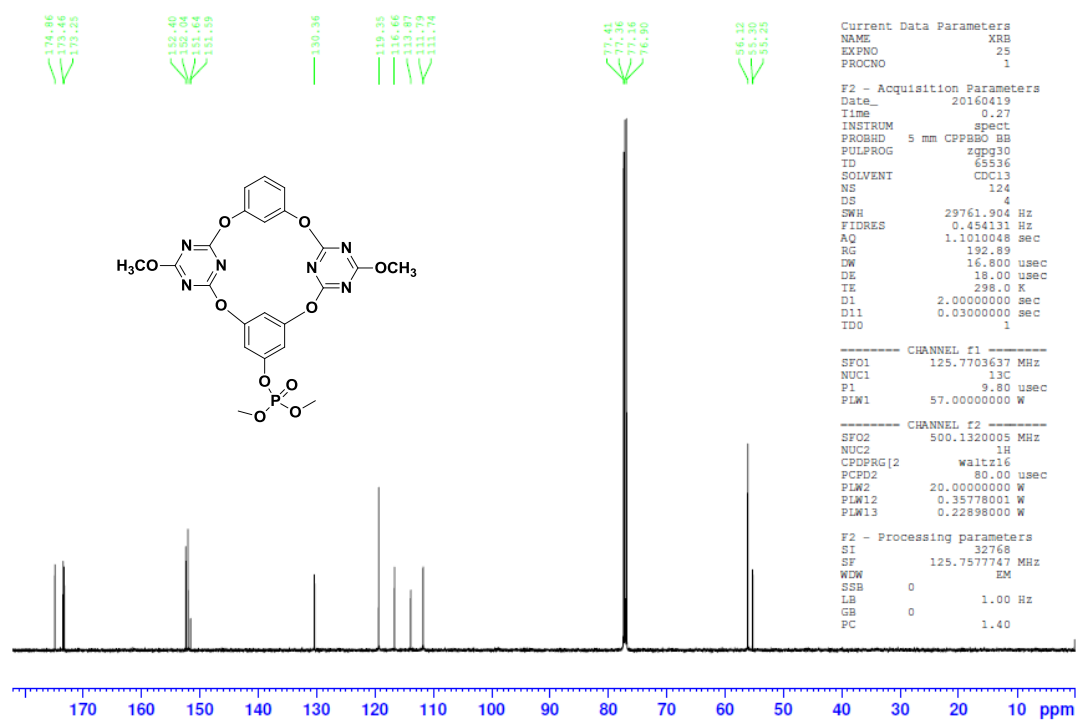

# 11 - <sup>1</sup>H NMR

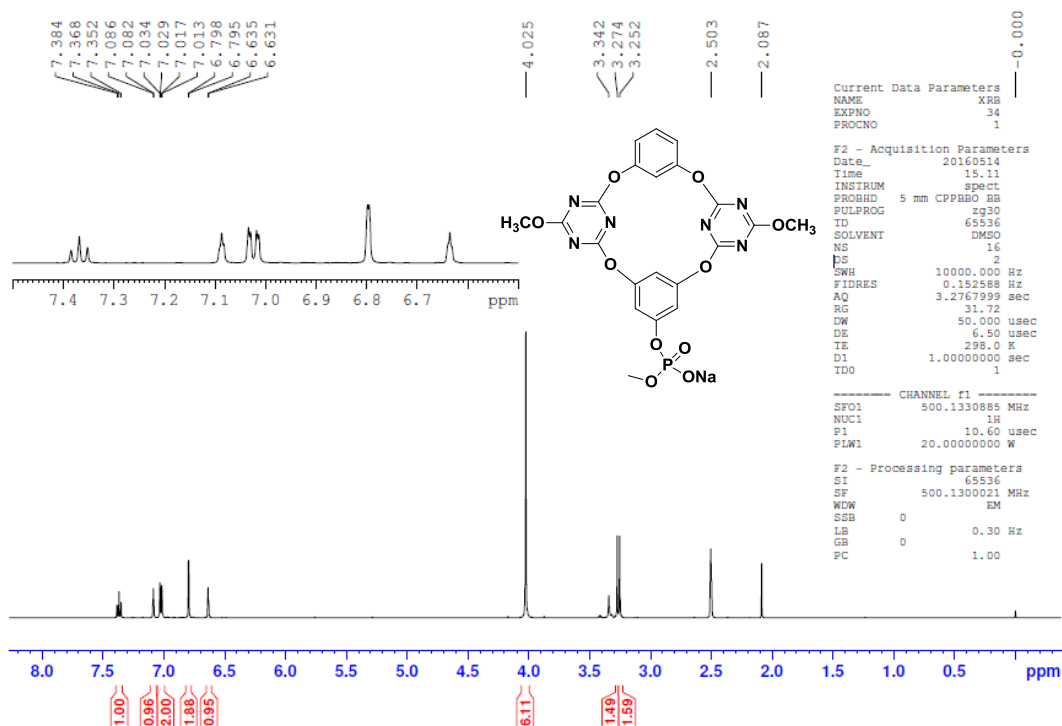

# 11 - <sup>13</sup>C NMR

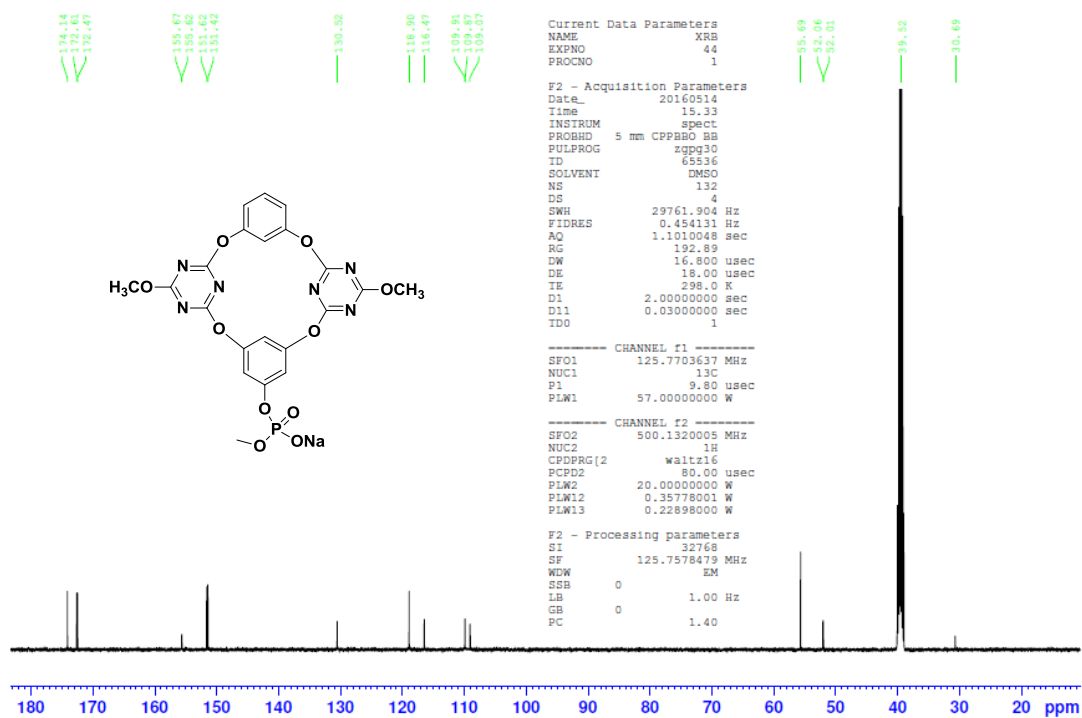

Supplement: Supplementary file 1 [file 7396231]
